# Supplementary material for: Theoretical study of azido gauche effect and its origin
Source: Royal Society of Chemistry journal article supplement (doi:10.1039/c7nj00369b), 2017-01-01
Supplement: c7nj00369b1.pdf [file c7nj00369b1.pdf]

## Theoretical study of azido *gauche* effect and its origin

Marija Baranac-Stojanović,<sup>\*a</sup> Milovan Stojanović<sup>b</sup> and Jovana Aleksić<sup>b</sup>

<sup>a</sup>*Faculty of Chemistry, University of Belgrade, Studentski trg 12-16, P.O.Box 158, 11000 Belgrade, Serbia*

<sup>b</sup>*Center for Chemistry ICTM, Njegoševa 12, University of Belgrade, P.O.Box 473, 11000 Belgrade, Serbia*

### *Supplementary Information*

#### **Table of Contents**

|                                                                                   |     |
|-----------------------------------------------------------------------------------|-----|
| Tables S1-S18.....                                                                | S2  |
| Figure S1. Optimized structures of isomers which are viable only in solvents..... | S19 |
| Absolute energies and x,y,z coordinates of optimized structures.....              | S20 |
| Gas-phase.....                                                                    | S20 |
| CH <sub>2</sub> Cl <sub>2</sub> .....                                             | S38 |
| DMSO.....                                                                         | S59 |
| Water.....                                                                        | S80 |

**Table S1.** Relative energies ( $\Delta E$ ), enthalpies ( $\Delta H$ ), free energies ( $\Delta G$ ), and free energies corrected for  $\Delta S_{\text{sym}}$  and  $\Delta S_{\text{mix}}$  ( $\Delta G_{\text{corr}}$ ) for ten conformers of diazidoethane in the gas-phase and in solvents ( $\text{CH}_2\text{Cl}_2$ , DMSO and  $\text{H}_2\text{O}$ ) and energy changes ( $\Delta\Delta$  values) upon conformational isomerizations, obtained at the MP2/6-311++G(d,p) level. All values are in kcal/mol.

| Conformer                                         | gas/ $\text{CH}_2\text{Cl}_2$ /DMSO/ $\text{H}_2\text{O}$ |                                                           |                                                           |                                                           |
|---------------------------------------------------|-----------------------------------------------------------|-----------------------------------------------------------|-----------------------------------------------------------|-----------------------------------------------------------|
|                                                   | $\Delta E$                                                | $\Delta H$                                                | $\Delta G$                                                | $\Delta G_{\text{corr}}$                                  |
| <i>aaa</i> , $C_2$                                | 1.84/2.30/2.45/2.46                                       | <b>1.91</b> /2.32/2.39/2.40                               | <b>1.79</b> / <b>2.19</b> /2.07/2.06                      | 2.20/2.60/2.48/2.47                                       |
| <i>aag</i> , $C_1$                                | 1.80/2.11/2.22/2.23                                       | 1.97/2.22/2.27/2.27                                       | 2.06/2.20/ <b>2.04</b> / <b>2.04</b>                      | <b>2.06</b> / <b>2.20</b> / <b>2.04</b> / <b>2.04</b>     |
| <i>gag</i> , $C_2$                                | <b>1.70</b> / <b>1.85</b> / <b>1.91</b> / <b>1.92</b>     | 1.93/ <b>2.05</b> / <b>2.04</b> / <b>2.04</b>             | 2.81/2.81/2.57/2.55                                       | 3.22/3.22/2.98/2.96                                       |
| <i>gag</i> <sup>-</sup> , $C_i$                   | 1.76/1.91/1.99/2.01                                       | 2.01/2.11/2.11/2.11                                       | 2.47/2.47/2.26/2.24                                       | 2.88/2.88/2.67/2.65                                       |
| <i>aga</i> , $C_2$                                | 1.49/1.13/1.06/1.05                                       | 1.61/1.13/0.99/0.97                                       | 1.90/0.90/0.86/0.86                                       | 2.31/1.31/1.27/1.27                                       |
| <i>agg</i> , $C_1$                                | 1.74/1.12/1.01/1.00                                       | 1.88/1.21/1.04/1.02                                       | 2.11/1.34/1.00/0.98                                       | 2.11/1.34/1.00/0.98                                       |
| <i>ag</i> <sup>-</sup> <i>g</i> , $C_1$           | 0.13/0.10/0.14/0.15                                       | 0.22/0.14/0.12/0.12                                       | 0.39/ <b>0.00</b> / <b>0.00</b> / <b>0.00</b>             | 0.39/ <b>0.00</b> / <b>0.00</b> / <b>0.00</b>             |
| <i>ggg</i> , $C_2$                                | 1.44/0.99/0.93/0.92                                       | 1.65/1.18/1.04/1.03                                       | 2.61/1.86/1.48/1.45                                       | 3.02/2.27/1.90/1.86                                       |
| <i>gg</i> <sup>-</sup> <i>g</i> , $C_1$           | <b>0.00</b> / <b>0.00</b> /0.04/0.05                      | <b>0.00</b> / <b>0.00</b> / <b>0.00</b> / <b>0.00</b>     | <b>0.00</b> /0.31/0.29/0.29                               | <b>0.00</b> /0.31/0.29/0.29                               |
| <i>ggg</i> <sup>-</sup> , $C_1$                   | 0.26/0.02/ <b>0.00</b> / <b>0.00</b>                      | 0.42/0.12/0.03/0.02                                       | 1.32/0.83/0.55/0.53                                       | 1.32/0.83/0.55/0.53                                       |
| Isomerization                                     | $\Delta\Delta E$                                          | $\Delta\Delta H$                                          | $\Delta\Delta G$                                          | $\Delta\Delta G_{\text{corr}}$                            |
| <i>aaa</i> → <i>aga</i>                           | -0.35/-1.18/-1.38/-1.41                                   | -0.30/-1.19/-1.40/-1.42                                   | 0.11/-1.29/-1.21/-1.20                                    | 0.11/-1.29/-1.21/-1.20                                    |
| <i>aag</i> → <i>agg</i>                           | -0.06/-0.98/-1.20/-1.23                                   | -0.09/-1.01/-1.23/-1.25                                   | 0.05/-0.86/-1.04/-1.06                                    | 0.05/-0.86/-1.04/-1.06                                    |
| <i>aag</i> → <i>ag</i> <sup>-</sup> <i>g</i>      | -1.67/-2.01/-2.07/-2.08                                   | -1.75/-2.09/-2.15/-2.16                                   | -1.67/-2.20/-2.04/-2.04                                   | -1.67/-2.20/-2.04/-2.04                                   |
| <i>gag</i> → <i>ggg</i>                           | -0.26/-0.85/-0.99/-1.00                                   | -0.28/-0.87/-1.00/-1.01                                   | -0.21/-0.95/-1.08/-1.10                                   | -0.21/-0.95/-1.08/-1.10                                   |
| <i>gag</i> → <i>gg</i> <sup>-</sup> <i>g</i>      | -1.70/-1.85/-1.87/-1.87                                   | -1.93/-2.05/-2.04/-2.04                                   | -2.81/-2.50/-2.28/-2.26                                   | -3.22/-2.91/-2.69/-2.67                                   |
| <i>gag</i> <sup>-</sup> → <i>ggg</i> <sup>-</sup> | -1.50/-1.89/-1.99/-2.01                                   | -1.60/-1.99/-2.09/-2.10                                   | -1.15/-1.64/-1.71/-1.71                                   | -1.56/-2.05/-2.12/-2.12                                   |
| <i>anti</i> → <i>gauche</i> <sup>a</sup>          | <b>-1.70</b> / <b>-1.85</b> / <b>-1.91</b> / <b>-1.92</b> | <b>-1.91</b> / <b>-2.05</b> / <b>-2.04</b> / <b>-2.04</b> | <b>-1.79</b> / <b>-2.19</b> / <b>-2.04</b> / <b>-2.04</b> | <b>-2.06</b> / <b>-2.20</b> / <b>-2.04</b> / <b>-2.04</b> |

<sup>a</sup> Energy difference between the most stable  $\text{CC}_{\text{gauche}}$  and the most stable  $\text{CC}_{\text{anti}}$  conformer (bolded numbers for each energy term).

**Table S2.** Contribution of various energy components to the total binding interactions between two  $\text{N}_3\text{CH}_2\cdot$  fragments in diazidoethane and energy changes ( $\Delta\Delta\text{E}$  values) occurring upon conformational isomerization.<sup>a</sup> Data for 1,2-difluoroethane (DFE) are included for comparison.<sup>b</sup> Values are in kcal/mol, obtained at the MP2/6-311++G(d,p) level.

| Conformer                                                 | $\Delta\text{E}_{\text{tot}}$ | $\Delta\text{E}_{\text{def}}$       | $\Delta\text{E}_{\text{int}}$       | $\Delta\text{E}_{\text{elstat}}$       | $\Delta\text{E}_{\text{oi}}$       | $\Delta\text{E}_{\text{disp}}$       | $\Delta\text{E}_{\text{Pauli}}$       |
|-----------------------------------------------------------|-------------------------------|-------------------------------------|-------------------------------------|----------------------------------------|------------------------------------|--------------------------------------|---------------------------------------|
| <i>aaa</i>                                                | -115.76                       | 33.19                               | -148.95                             | -147.21                                | -151.59                            | -66.53                               | 216.38                                |
| <i>aag</i>                                                | -115.92                       | 25.41                               | -141.33                             | -150.53                                | -153.35                            | -67.77                               | 230.32                                |
| <i>gag</i>                                                | -116.08                       | 17.39                               | -133.47                             | -153.37                                | -154.27                            | -68.61                               | 242.78                                |
|                                                           | <i>-117.06</i>                | <i>16.10</i>                        | <i>-133.13</i>                      | <i>-146.20</i>                         | <i>-159.90</i>                     | <i>-67.73</i>                        | <i>240.70</i>                         |
| <i>gag</i> <sup>-</sup>                                   | -116.01                       | 17.21                               | -133.22                             | -153.73                                | -154.59                            | -68.20                               | 243.30                                |
| <i>aga</i>                                                | -116.22                       | 21.64                               | -137.86                             | -147.87                                | -154.09                            | -55.86                               | 219.96                                |
| <i>agg</i>                                                | -115.98                       | 20.16                               | -136.14                             | -150.40                                | -154.47                            | -62.10                               | 230.83                                |
| <i>ag</i> <sup>-</sup> <i>g</i>                           | -117.53                       | 24.57                               | -142.10                             | -153.13                                | -156.05                            | -68.37                               | 235.45                                |
| <i>ggg</i>                                                | -116.29                       | 18.59                               | -134.88                             | -154.48                                | -154.14                            | -68.09                               | 241.83                                |
| <i>gg</i> <sup>-</sup> <i>g</i>                           | -117.62                       | 17.57                               | -135.19                             | -153.92                                | -157.16                            | -71.50                               | 247.39                                |
|                                                           | <i>-118.88</i>                | <i>17.29</i>                        | <i>-136.19</i>                      | <i>-148.16</i>                         | <i>-163.12</i>                     | <i>-71.24</i>                        | <i>246.33</i>                         |
| <i>ggg</i> <sup>-</sup>                                   | -117.46                       | 17.95                               | -135.41                             | -155.45                                | -155.91                            | -70.93                               | 246.88                                |
| <i>a</i> DFE                                              | -97.82                        | 10.31                               | -108.13                             | -148.82                                | -155.48                            | -25.50                               | 221.67                                |
| <i>g</i> DFE                                              | -98.58                        | 10.50                               | -109.08                             | -152.20                                | -160.01                            | -26.11                               | 229.24                                |
| Isomerization                                             | $\Delta\text{E}_{\text{iso}}$ | $\Delta\Delta\text{E}_{\text{def}}$ | $\Delta\Delta\text{E}_{\text{int}}$ | $\Delta\Delta\text{E}_{\text{elstat}}$ | $\Delta\Delta\text{E}_{\text{oi}}$ | $\Delta\Delta\text{E}_{\text{disp}}$ | $\Delta\Delta\text{E}_{\text{Pauli}}$ |
| <i>aaa</i> → <i>aga</i>                                   | -0.35                         | -11.44                              | 11.09                               | -0.66<br>(20.9)                        | -2.50<br>(79.1)                    | 10.67                                | 3.58                                  |
| <i>aag</i> → <i>agg</i>                                   | -0.06                         | -5.25                               | 5.19                                | 0.13                                   | -1.12                              | 5.67                                 | 0.51                                  |
| <i>aag</i> → <i>ag</i> <sup>-</sup> <i>g</i>              | -1.67                         | -0.90                               | -0.77                               | -2.60<br>(44.1)                        | -2.70<br>(45.8)                    | -0.60<br>(10.1)                      | 5.13                                  |
| <i>gag</i> → <i>ggg</i>                                   | -0.26                         | 1.15                                | -1.41                               | -1.11<br>(50.7)                        | -0.13<br>(5.9)                     | 0.52                                 | -0.95<br>(43.4)                       |
| <i>gag</i> → <i>gg</i> <sup>-</sup> <i>g</i> <sup>c</sup> | -1.70                         | 0.02                                | -1.72                               | -0.55<br>(8.6)                         | -2.89<br>(45.7)                    | -2.89<br>(45.7)                      | 4.61                                  |
|                                                           | <i>-1.87</i>                  | <i>1.19</i>                         | <i>-3.06</i>                        | <i>-1.96</i><br>(22.6)                 | <i>-3.22</i><br>(37.1)             | <i>-3.51</i><br>(40.3)               | <i>5.63</i>                           |
| <i>gag</i> <sup>-</sup> → <i>ggg</i> <sup>-</sup>         | -1.50                         | 0.69                                | -2.19                               | -1.72<br>(29.8)                        | -1.32<br>(22.9)                    | -2.73<br>(47.3)                      | 3.58                                  |
| <i>a</i> DFE → <i>g</i> DFE                               | -0.77                         | 0.18                                | -0.95                               | -3.38<br>(39.7)                        | -4.53<br>(53.2)                    | -0.61<br>(7.1)                       | 7.57                                  |

<sup>a</sup>  $\Delta\text{E}_{\text{tot}}$  = total binding energy between two radical fragments,  $\Delta\text{E}_{\text{def}}$  = deformation energy,  $\Delta\text{E}_{\text{int}}$  = interaction energy,  $\Delta\text{E}_{\text{elstat}}$  = electrostatic energy,  $\Delta\text{E}_{\text{oi}}$  = orbital interaction energy,  $\Delta\text{E}_{\text{disp}}$  = dispersion energy,  $\Delta\text{E}_{\text{Pauli}}$  = Pauli repulsion,  $\Delta\text{E}_{\text{iso}}$  = isomerization energy,  $\Delta\Delta\text{E}$  values represent individual energy changes upon conformational isomerization. Values in italic are in  $\text{H}_2\text{O}$ . Values in parentheses are percentage contribution to all attractive interactions contained in  $\Delta\Delta\text{E}_{\text{int}}$ . <sup>b</sup>From ref. 3f. <sup>c</sup>Corresponds to the most stable  $\text{CC}_{\text{anti}}$  → the most stable  $\text{CC}_{\text{gauche}}$  isomerization.

**Table S3.** Energies of vicinal hyperconjugative interactions between two  $N_3CH_2$  fragments in 1,2-diazidoethane and their change upon conformational isomerization, estimated on the basis of second-order perturbative approach at the HF/6-311++G(d,p) level.<sup>a</sup> Energies are in kcal/mol.

| Conformer                                         | total  | total <sub>gauche</sub> | total <sub>anti</sub> | $\sigma_{CH} \rightarrow \sigma_{CH}^*$ | $\sigma_{CN} \rightarrow \sigma_{CN}^*$ | $\sigma_{CH} \rightarrow \sigma_{CN}^*$ | $\sigma_{CN} \rightarrow \sigma_{CH}^*$ |
|---------------------------------------------------|--------|-------------------------|-----------------------|-----------------------------------------|-----------------------------------------|-----------------------------------------|-----------------------------------------|
| <i>aag</i> , $C_1$                                | -20.27 | -3.92                   | -16.35                | -3.19/-2.90/-3.12/-3.28                 | -2.09/-1.77                             |                                         |                                         |
| <i>gag</i> , $C_2$                                | -20.06 | -3.74                   | -16.32                | -3.34/-2.82/-2.82/-3.34                 | -2.00/-2.00                             |                                         |                                         |
| <i>gag</i> <sup>-</sup> , $C_i$                   | -19.98 | -3.76                   | -16.22                | -3.01/-3.14/-3.01/-3.14                 | -1.96/-1.96                             |                                         |                                         |
| <i>ag</i> <sup>-</sup> <i>g</i> , $C_1$           | -21.46 | -3.94                   | -17.52                | -3.29/-3.27                             |                                         | -3.88/-4.37                             | -1.38/-1.33                             |
| <i>ggg</i> <sup>-</sup> , $C_1$                   | -21.69 | -3.69                   | -18.00                | -3.49/-2.97                             |                                         | -4.32/-4.59                             | -1.25/-1.38                             |
| <i>gg</i> <sup>-</sup> <i>g</i> , $C_1$           | -21.62 | -3.69                   | -18.93                | -3.28/-3.23                             |                                         | -4.47/-4.51                             | -1.21/-1.23                             |
| Isomerization                                     |        |                         |                       |                                         |                                         |                                         |                                         |
| <i>aag</i> → <i>ag</i> <sup>-</sup> <i>g</i>      | -1.19  | -0.02                   | -1.17                 |                                         |                                         |                                         |                                         |
| <i>gag</i> → <i>gg</i> <sup>-</sup> <i>g</i>      | -1.56  | 0.05                    | -1.61                 |                                         |                                         |                                         |                                         |
| <i>gag</i> <sup>-</sup> → <i>ggg</i> <sup>-</sup> | -1.71  | 0.07                    | -1.78                 |                                         |                                         |                                         |                                         |

<sup>a</sup> Individual interactions correspond to *anti* vicinal hyperconjugation. Total<sub>anti</sub> is the sum of six interactions between *anti*-related  $\sigma$ -bonds. Total<sub>gauche</sub> is the sum of twelve interactions between *gauche*-related  $\sigma$ -bonds. Total is the sum of all vicinal hyperconjugations, that is total<sub>anti</sub> + total<sub>gauche</sub>.

**Table S4.** Relative energies ( $\Delta E$ ), enthalpies ( $\Delta H$ ), free energies ( $\Delta G$ ), free energies corrected for  $\Delta S_{\text{sym}}$  and  $\Delta S_{\text{mix}}$  ( $\Delta G_{\text{corr}}$ ) for fourteen conformers of 2-azidoethanamine in the gas-phase and in solvents ( $\text{CH}_2\text{Cl}_2$ , DMSO and  $\text{H}_2\text{O}$ ) and energy changes ( $\Delta\Delta$  values) upon conformational isomerizations, obtained at the MP2/6-311++G(d,p) level. All values are in kcal/mol.

| Conformer                                                               | gas/ $\text{CH}_2\text{Cl}_2$ /DMSO/ $\text{H}_2\text{O}$ |                                |                                |                                |
|-------------------------------------------------------------------------|-----------------------------------------------------------|--------------------------------|--------------------------------|--------------------------------|
|                                                                         | $\Delta E$                                                | $\Delta H$                     | $\Delta G$                     | $\Delta G_{\text{corr}}$       |
| <i>aaa</i> , $C_s$                                                      | 1.93/1.19/1.14/1.14                                       | 1.87/1.16/1.11/1.11            | <b>1.16/0.69/0.52/0.50</b>     | 1.57/ <b>1.10/0.93/0.91</b>    |
| <i>aag</i> , $C_1$                                                      | 1.67/1.41/1.48/1.49                                       | 1.69/1.39/1.45/1.46            | 1.49/1.24/1.16/1.16            | <b>1.49/1.24/1.16/1.16</b>     |
| <i>gaa</i> , $C_1$                                                      | 1.63/ <b>0.86/0.82/0.82</b>                               | 1.71/ <b>0.93/0.89/0.89</b>    | 1.95/1.26/1.09/1.08            | 1.95/1.26/1.09/1.08            |
| <i>gag</i> , $C_1$                                                      | <b>1.49/1.16/1.23/1.23</b>                                | <b>1.61/1.21/1.28/1.29</b>     | 1.75/1.40/1.36/1.36            | 1.75/1.40/1.36/1.36            |
| <i>gag<sup>-</sup></i> , $C_1$                                          | 1.53/1.20/1.25/1.26                                       | 1.62/1.23/1.27/1.28            | 1.75/1.40/1.33/1.32            | 1.75/1.40/1.33/1.32            |
| <i>aga</i> , $C_1$                                                      | 0.51/0.13/0.16/0.16                                       | 0.43/0.07/0.10/0.10            | 0.10/0.09/0.11/0.12            | 0.10/0.09/0.11/0.12            |
| <i>agg</i> , $C_1$                                                      | <b>0.00/0.10/0.23/0.24</b>                                | <b>0.00/0.04/0.16/0.17</b>     | <b>0.00/0.00/0.00/0.00</b>     | <b>0.00/0.00/0.00/0.00</b>     |
| <i>ag<sup>-</sup>g</i> , $C_1$                                          | - /- /1.44/1.41                                           | - /- /1.31/1.28                | - /- /0.90/0.83                | - /- /0.90/0.83                |
| <i>gga</i> , $C_1$                                                      | 0.70/0.10/0.10/0.11                                       | 0.74/0.16/0.17/0.17            | 1.12/0.73/0.65/0.65            | 1.12/0.73/0.65/0.65            |
| <i>ggg</i> , $C_1$                                                      | 0.32/0.14/0.19/0.20                                       | 0.40/0.19/0.23/0.24            | 0.85/0.74/0.68/0.68            | 0.85/0.74/0.68/0.68            |
| <i>ggg<sup>-</sup></i> , $C_1$                                          | 1.99/1.04/0.90/0.88                                       | 2.03/1.09/0.94/0.93            | 2.33/1.10/1.05/1.04            | 2.33/1.10/1.05/1.04            |
| <i>gg<sup>-</sup>a</i> , $C_1$                                          | 0.99/0.50/0.51/0.51                                       | 1.00/0.50/0.51/0.51            | 1.42/0.94/0.83/0.82            | 1.42/0.94/0.83/0.82            |
| <i>gg<sup>-</sup>g<sup>-</sup></i> , $C_1$                              | 0.52/0.38/0.46/0.47                                       | 0.57/0.39/0.49/0.50            | 0.80/0.84/0.87/0.88            | 0.80/0.84/0.87/0.88            |
| <i>gg<sup>-</sup>g</i> , $C_1$                                          | 0.48/ <b>0.00/0.00/0.00</b>                               | 0.47/ <b>0.00/0.00/0.00</b>    | 1.02/0.65/0.57/0.56            | 1.02/0.65/0.57/0.56            |
| Isomerization                                                           | $\Delta\Delta E$                                          | $\Delta\Delta H$               | $\Delta\Delta G$               | $\Delta\Delta G_{\text{corr}}$ |
| <i>aaa</i> $\rightarrow$ <i>aga</i>                                     | -1.42/-1.06/-0.99/-0.98                                   | -1.44/-1.10/-1.01/-1.00        | -1.07/-0.60/-0.40/-0.39        | -1.48/-1.01/-0.81/-0.80        |
| <i>aag</i> $\rightarrow$ <i>agg</i>                                     | -1.67/-1.31/-1.25/-1.24                                   | -1.69/-1.35/-1.30/-1.29        | -1.49/-1.24/-1.16/-1.16        | -1.49/-1.24/-1.16/-1.16        |
| <i>aag</i> $\rightarrow$ <i>ag<sup>-</sup>g</i>                         | - /- /-0.04/-0.08                                         | - /- /-0.14/-0.18              | - /- /-0.27/-0.33              | - /- /-0.27/-0.33              |
| <i>gaa</i> $\rightarrow$ <i>gga</i>                                     | -0.93/-0.76/-0.72/-0.71                                   | -0.96/-0.77/-0.72/-0.71        | -0.83/-0.52/-0.44/-0.43        | -0.83/-0.52/-0.44/-0.43        |
| <i>gaa</i> $\rightarrow$ <i>gg<sup>-</sup>a</i>                         | -0.64/-0.36/-0.31/-0.31                                   | -0.70/-0.44/-0.38/-0.38        | -0.52/-0.32/-0.27/-0.26        | -0.52/-0.32/-0.27/-0.26        |
| <i>gag</i> $\rightarrow$ <i>ggg</i>                                     | -1.17/-1.02/-1.03/-1.04                                   | -1.21/-1.03/-1.04/-1.05        | -0.89/-0.66/-0.68/-0.68        | -0.89/-0.66/-0.68/-0.68        |
| <i>gag</i> $\rightarrow$ <i>gg<sup>-</sup>g</i>                         | -1.01/-1.16/-1.23/-1.23                                   | -1.13/-1.21/-1.28/-1.29        | -0.72/-0.75/-0.80/-0.80        | -0.72/-0.75/-0.80/-0.80        |
| <i>gag<sup>-</sup></i> $\rightarrow$ <i>ggg<sup>-</sup></i>             | 0.46/-0.16/-0.35/-0.37                                    | 0.42/-0.14/-0.33/-0.35         | 0.58/-0.30/-0.27/-0.28         | 0.58/-0.30/-0.27/-0.28         |
| <i>gag<sup>-</sup></i> $\rightarrow$ <i>gg<sup>-</sup>g<sup>-</sup></i> | -1.01/-0.82/-0.79/-0.78                                   | -1.04/-0.83/-0.78/-0.77        | -0.95/-0.56/-0.45/-0.44        | -0.95/-0.56/-0.45/-0.44        |
| <i>anti</i> $\rightarrow$ <i>gauche<sup>a</sup></i>                     | <b>-1.49/-0.86/-0.82/-0.82</b>                            | <b>-1.61/-0.93/-0.89/-0.89</b> | <b>-1.16/-0.69/-0.52/-0.50</b> | <b>-1.49/-1.10/-0.93/-0.91</b> |

<sup>a</sup> Energy difference between the most stable  $\text{CC}_{\text{gauche}}$  and the most stable  $\text{CC}_{\text{anti}}$  conformer (bolded numbers for each energy term).

**Table S5.** Contribution of various energy components to the total binding interactions between  $\text{N}_3\text{CH}_2\cdot$  and  $\cdot\text{CH}_2\text{NH}_2$  fragments and energy changes ( $\Delta\Delta\text{E}$  values) occurring upon conformational isomerization.<sup>a</sup> Data for 2-fluoroethanamine (2FEA) are included for comparison.<sup>b</sup> Values are in kcal/mol, obtained at the MP2/6-311++G(d,p) level.

| Conformer                                                   | $\Delta\text{E}_{\text{tot}}$ | $\Delta\text{E}_{\text{def}}$       | $\Delta\text{E}_{\text{int}}$       | $\Delta\text{E}_{\text{elstat}}$       | $\Delta\text{E}_{\text{oi}}$       | $\Delta\text{E}_{\text{disp}}$       | $\Delta\text{E}_{\text{Pauli}}$       |
|-------------------------------------------------------------|-------------------------------|-------------------------------------|-------------------------------------|----------------------------------------|------------------------------------|--------------------------------------|---------------------------------------|
| <i>aaa</i>                                                  | -99.45                        | 23.92                               | -123.37                             | -158.94                                | -155.77                            | -47.67                               | 239.01                                |
| <i>aag</i>                                                  | -99.69                        | 29.87                               | -129.56                             | -153.75                                | -153.18                            | -49.03                               | 226.40                                |
| <i>gaa</i>                                                  | -99.78                        | 15.13                               | -114.91                             | -162.24                                | -156.85                            | -47.46                               | 251.64                                |
|                                                             | -99.17                        | 15.04                               | -114.11                             | -155.81                                | -164.73                            | -47.07                               | 253.50                                |
| <i>gag</i>                                                  | -99.93                        | 21.82                               | -121.75                             | -157.03                                | -154.38                            | -49.50                               | 239.16                                |
| <i>gag<sup>-</sup></i>                                      | -99.89                        | 21.91                               | -121.80                             | -156.98                                | -154.52                            | -49.70                               | 239.40                                |
| <i>aga</i>                                                  | -100.86                       | 23.91                               | -124.77                             | -160.90                                | -156.25                            | -47.93                               | 240.31                                |
| <i>agg</i>                                                  | -101.36                       | 30.90                               | -132.26                             | -155.00                                | 154.29                             | -50.14                               | 227.17                                |
| <i>gga</i>                                                  | -100.72                       | 15.51                               | -116.23                             | -164.30                                | -157.49                            | -47.95                               | 253.51                                |
| <i>ggg</i>                                                  | -101.11                       | 23.84                               | -124.95                             | -157.96                                | -155.12                            | -51.24                               | 239.37                                |
| <i>ggg<sup>-</sup></i>                                      | -99.41                        | 24.02                               | -123.43                             | -155.86                                | -153.49                            | -48.59                               | 234.51                                |
| <i>gg<sup>-</sup>a</i>                                      | -100.38                       | 15.36                               | -115.74                             | -162.98                                | -158.73                            | -48.78                               | 254.75                                |
|                                                             | -99.81                        | 15.57                               | -114.95                             | -157.05                                | -166.12                            | -48.33                               | 256.55                                |
| <i>gg<sup>-</sup>g<sup>-</sup></i>                          | -100.87                       | 21.08                               | -121.95                             | -159.28                                | -157.59                            | -50.41                               | 245.33                                |
| <i>gg<sup>-</sup>g</i>                                      | -100.88                       | 21.45                               | -122.33                             | -160.09                                | -156.78                            | -50.72                               | 245.26                                |
|                                                             | -99.74                        | 21.46                               | -121.35                             | -153.94                                | -163.32                            | -50.71                               | 246.62                                |
| <i>ag</i> 2FEA                                              | -90.92                        | 17.74                               | -108.66                             | -155.31                                | -155.91                            | -27.54                               | 230.10                                |
| <i>gg</i> 2FEA                                              | -92.31                        | 19.67                               | -111.98                             | -156.77                                | -157.53                            | -28.82                               | 231.14                                |
| Isomerization                                               | $\Delta\text{E}_{\text{iso}}$ | $\Delta\Delta\text{E}_{\text{def}}$ | $\Delta\Delta\text{E}_{\text{int}}$ | $\Delta\Delta\text{E}_{\text{elstat}}$ | $\Delta\Delta\text{E}_{\text{oi}}$ | $\Delta\Delta\text{E}_{\text{disp}}$ | $\Delta\Delta\text{E}_{\text{Pauli}}$ |
| <i>aaa</i> → <i>aga</i>                                     | -1.42                         | -0.02                               | -1.40                               | -1.96<br>(72.6)                        | -0.48<br>(17.8)                    | -0.26<br>(9.6)                       | 1.30                                  |
| <i>aag</i> → <i>agg</i>                                     | -1.67                         | 1.03                                | -2.70                               | -1.25<br>(36.0)                        | -1.11<br>(32.0)                    | -1.11<br>(32.0)                      | 0.77                                  |
| <i>gaa</i> → <i>gga</i>                                     | -0.93                         | 0.39                                | -1.32                               | -2.06<br>(64.6)                        | -0.64<br>(20.1)                    | -0.49<br>(15.3)                      | 1.87                                  |
| <i>gaa</i> → <i>gg<sup>-</sup>a</i>                         | -0.64                         | 0.19                                | -0.83                               | -0.74<br>(18.8)                        | -1.88<br>(47.7)                    | -1.32<br>(33.5)                      | 3.11                                  |
| <i>gag</i> → <i>ggg</i>                                     | -1.17                         | 2.03                                | -3.20                               | -0.93<br>(27.3)                        | -0.74<br>(21.7)                    | -1.74<br>(51.0)                      | 0.21                                  |
| <i>gag</i> → <i>gg<sup>-</sup>g</i>                         | -1.01                         | -0.43                               | -0.58                               | -3.06<br>(45.8)                        | -2.40<br>(35.9)                    | -1.22<br>(18.3)                      | 6.10                                  |
| <i>gag<sup>-</sup></i> → <i>ggg<sup>-</sup></i>             | 0.46                          | 2.09                                | -1.63                               | 1.12                                   | 1.03                               | 1.11                                 | -4.89                                 |
| <i>gag<sup>-</sup></i> → <i>gg<sup>-</sup>g<sup>-</sup></i> | -1.01                         | -0.86                               | -0.15                               | -2.30<br>(37.8)                        | -3.07<br>(50.5)                    | -0.71<br>(11.7)                      | 5.93                                  |
| <i>gag</i> → <i>ggg</i>                                     | -1.17                         | 2.03                                | -3.20                               | -0.93                                  | -0.74                              | -1.74                                | 0.21                                  |
| <i>ggg</i> → <i>agg</i>                                     | -0.32                         | 6.99                                | -7.31                               | 2.96                                   | 0.83                               | 1.10                                 | -12.20                                |
| <i>gag</i> → <i>agg<sup>c</sup></i>                         | -1.49                         | 9.02                                | -10.51                              | 2.03                                   | 0.09                               | -0.64                                | -11.99                                |

|                                                  |              |             |              |              |              |              |              |
|--------------------------------------------------|--------------|-------------|--------------|--------------|--------------|--------------|--------------|
| <i>gag</i> → <i>aag</i>                          | 0.18         | 7.99        | -7.81        | 3.28         | 1.20         | 0.47         | -12.76       |
| <i>aag</i> → <i>agg</i>                          | -1.67        | 1.03        | -2.70        | -1.25        | -1.11        | -1.11        | 0.77         |
| <i>gag</i> → <i>agg</i> <sup>c</sup>             | -1.49        | 9.02        | -10.51       | 2.03         | 0.09         | -0.64        | -11.99       |
| <i>gaa</i> → <i>gg<sup>-</sup>a</i>              | <i>-0.31</i> | <i>0.53</i> | <i>-0.84</i> | <i>-1.24</i> | <i>-1.39</i> | <i>-1.26</i> | <i>3.05</i>  |
|                                                  |              |             |              | (31.9)       | (35.7)       | (32.4)       |              |
| <i>gg<sup>-</sup>a</i> → <i>gg<sup>-</sup>g</i>  | <i>-0.51</i> | <i>5.89</i> | <i>-6.40</i> | <i>3.11</i>  | <i>2.80</i>  | <i>-2.38</i> | <i>-9.93</i> |
|                                                  |              |             |              |              |              | (19.3)       | (80.7)       |
| <i>gaa</i> → <i>gg<sup>-</sup>g</i> <sup>c</sup> | <i>-0.82</i> | <i>6.42</i> | <i>-7.24</i> | <i>1.87</i>  | <i>1.41</i>  | <i>-3.64</i> | <i>-6.88</i> |
| <i>ag</i> 2FEA → <i>gg</i> 2FEA                  | -1.40        | 1.92        | -3.32        | -1.46        | -1.62        | -1.28        | 1.04         |
|                                                  |              |             |              | (33.5)       | (37.2)       | (29.3)       |              |

<sup>a</sup> Labeling of various energy terms is the same as in Table 2. Values in italic are in H<sub>2</sub>O. Values in parentheses are percentage contribution to all attractive interactions. <sup>b</sup>From ref. 3f. <sup>c</sup>Corresponds to the most stable CC<sub>anti</sub> → the most stable CC<sub>gauche</sub> isomerization.

**Table S6.** Energies of vicinal hyperconjugative interactions between  $N_3CH_2$  and  $CH_2NH_2$  fragments in 2-azidoethanamine and their change upon conformational isomerization, estimated on the basis of second-order perturbative approach at the HF/6-311++G(d,p) level.<sup>a</sup> Energies are in kcal/mol.

| Conformer                                                   | total  | total <sub>gauche</sub> | total <sub>anti</sub> | $\sigma_{CH} \rightarrow \sigma_{CH}^*$ | $\sigma_{CN_3} \rightarrow \sigma_{CNH_2}^*$<br>$\sigma_{CNH_2} \rightarrow \sigma_{CN_3}^*$ | $\sigma_{CH} \rightarrow \sigma_{CN_3}^*$<br>$\sigma_{CH} \rightarrow \sigma_{CNH_2}^*$ | $\sigma_{CN_3} \rightarrow \sigma_{CH}^*$<br>$\sigma_{CNH_2} \rightarrow \sigma_{CH}^*$ |
|-------------------------------------------------------------|--------|-------------------------|-----------------------|-----------------------------------------|----------------------------------------------------------------------------------------------|-----------------------------------------------------------------------------------------|-----------------------------------------------------------------------------------------|
| <i>aaa</i>                                                  | -20.63 | -3.34                   | -17.29                | -3.63/-3.63/-3.01/-3.01                 | -2.26/-1.75                                                                                  |                                                                                         |                                                                                         |
| <i>aag</i>                                                  | -20.66 | -3.65                   | -17.01                | -3.32/-3.63/-3.00/-3.00                 | -1.90/-2.16                                                                                  |                                                                                         |                                                                                         |
| <i>gaa</i>                                                  | -20.28 | -3.21                   | -17.07                | -3.63/-3.32/-2.96/-3.11                 | -2.10/-1.95                                                                                  |                                                                                         |                                                                                         |
| <i>gag</i>                                                  | -20.46 | -3.50                   | -16.96                | -3.33/-3.37/-2.99/-3.09                 | -1.79/-2.39                                                                                  |                                                                                         |                                                                                         |
| <i>gag<sup>-</sup></i>                                      | -20.57 | -3.55                   | -17.02                | -3.69/-3.03/-2.95/-3.14                 | -1.82/-2.39                                                                                  |                                                                                         |                                                                                         |
| <i>aga</i>                                                  | -21.74 | -3.28                   | -18.46                | -3.81/-3.02                             |                                                                                              | -4.34/-4.76                                                                             | -1.27/-1.26                                                                             |
| <i>agg</i>                                                  | -21.69 | -3.70                   | -17.99                | -3.56/-3.10                             |                                                                                              | -4.42/-3.98                                                                             | -1.34/-1.59                                                                             |
| <i>gga</i>                                                  | -22.09 | -3.13                   | -18.96                | -3.54/-3.18                             |                                                                                              | -5.00/-4.73                                                                             | -1.25/-1.26                                                                             |
| <i>ggg</i>                                                  | -22.08 | -3.60                   | -18.48                | -3.32/-3.22                             |                                                                                              | -5.09/-3.94                                                                             | -1.32/-1.59                                                                             |
| <i>gg<sup>-</sup>a</i>                                      | -22.27 | -3.14                   | -19.13                | -3.84/-3.01                             |                                                                                              | -5.10/-4.98                                                                             | -1.15/-1.05                                                                             |
| <i>gg<sup>-</sup>g<sup>-</sup></i>                          | -21.60 | -3.36                   | -18.24                | -3.52/-3.05                             |                                                                                              | -4.86/-4.07                                                                             | -1.30/-1.44                                                                             |
| <i>gg<sup>-</sup>g</i>                                      | -21.70 | -3.56                   | -18.14                | -3.75/-3.05                             |                                                                                              | -4.55/-4.13                                                                             | -1.27/-1.39                                                                             |
| Isomerization                                               |        |                         |                       |                                         |                                                                                              |                                                                                         |                                                                                         |
| <i>aaa</i> → <i>aga</i>                                     | -1.11  | 0.06                    | -1.17                 |                                         |                                                                                              |                                                                                         |                                                                                         |
| <i>aag</i> → <i>agg</i>                                     | -1.03  | -0.05                   | -0.98                 |                                         |                                                                                              |                                                                                         |                                                                                         |
| <i>gaa</i> → <i>gga</i>                                     | -1.81  | 0.08                    | -1.89                 |                                         |                                                                                              |                                                                                         |                                                                                         |
| <i>gaa</i> → <i>gg<sup>-</sup>a</i>                         | -1.99  | 0.07                    | -2.06                 |                                         |                                                                                              |                                                                                         |                                                                                         |
| <i>gag</i> → <i>ggg</i>                                     | -1.62  | -0.10                   | -1.52                 |                                         |                                                                                              |                                                                                         |                                                                                         |
| <i>gag</i> → <i>gg<sup>-</sup>g</i>                         | -1.24  | -0.06                   | -1.18                 |                                         |                                                                                              |                                                                                         |                                                                                         |
| <i>gag<sup>-</sup></i> → <i>gg<sup>-</sup>g<sup>-</sup></i> | -1.03  | 0.19                    | -1.22                 |                                         |                                                                                              |                                                                                         |                                                                                         |

<sup>a</sup> Individual interactions correspond to *anti* vicinal hyperconjugation. Total<sub>anti</sub> is the sum of six interactions between *anti*-related  $\sigma$ -bonds. Total<sub>gauche</sub> is the sum of twelve interactions between *gauche*-related  $\sigma$ -bonds. Total is the sum of all vicinal hyperconjugations, that is total<sub>anti</sub> + total<sub>gauche</sub>.



**Table S7.** Relative energies ( $\Delta E$ ), enthalpies ( $\Delta H$ ) and free energies ( $\Delta G$ ) for four conformers of 2-azidoethylammonium cation in the gas-phase and in solvents ( $\text{CH}_2\text{Cl}_2$ , DMSO and  $\text{H}_2\text{O}$ ) and energy changes ( $\Delta\Delta$  values) upon conformational isomerizations, obtained at the MP2/6-311++G(d,p) level. All values are in kcal/mol.

| Conformer                                      | gas/ $\text{CH}_2\text{Cl}_2$ /DMSO/ $\text{H}_2\text{O}$ |                                |                                |
|------------------------------------------------|-----------------------------------------------------------|--------------------------------|--------------------------------|
|                                                | $\Delta E$                                                | $\Delta H$                     | $\Delta G$                     |
| <i>aa</i> , $C_1$                              | <b>8.60/3.58/2.97/2.91</b>                                | <b>8.60/3.83/3.21/3.14</b>     | <b>7.57/3.24/3.11/3.08</b>     |
| <i>ag</i> , $C_1$                              | 9.79/3.80/3.05/2.98                                       | 9.77/4.19/3.41/3.33            | 9.00/4.46/3.83/3.77            |
| <i>ga</i> , $C_1$                              | <b>0.00/0.00/0.00/0.00</b>                                | <b>0.00/0.00/0.00/0.00</b>     | <b>0.00/0.00/0.00/0.00</b>     |
| <i>gg</i> , $C_1$                              | - /0.83/0.59/0.57                                         | - /0.83/0.66/0.63              | - /1.08/1.31/1.32              |
| Isomerization                                  | $\Delta\Delta E$                                          | $\Delta\Delta H$               | $\Delta\Delta G$               |
| <i>aa</i> $\rightarrow$ <i>ga</i> <sup>a</sup> | <b>-8.60/-3.58/-2.97/-2.91</b>                            | <b>-8.60/-3.38/-3.21/-3.14</b> | <b>-7.57/-3.24/-3.11/-3.08</b> |
| <i>ag</i> $\rightarrow$ <i>gg</i>              | - /-2.97/-2.46/-2.41                                      | - /-3.36/-2.75/-2.70           | - /-3.38/-2.52/-2.45           |

<sup>a</sup> Energy difference between the most stable  $\text{CC}_{\text{gauche}}$  and the most stable  $\text{CC}_{\text{anti}}$  conformer (bolded numbers for each energy term).

**Table S8.** Contribution of various energy components to the total binding interactions between  $\text{N}_3\text{CH}_2\cdot$  and  $\cdot\text{CH}_2\text{NH}_3^+$  fragments in the most stable  $\text{CC}_{\text{anti}}$  and the most stable  $\text{CC}_{\text{gauche}}$  forms and energy changes ( $\Delta\Delta E$  values) occurring upon conformational isomerization.<sup>a</sup> Data for 2-fluoroethylammonium cation (2FEAH) are included for comparison.<sup>b</sup> Values are in kcal/mol, obtained at the MP2/6-311++G(d,p) level.

| Conformer                                   | $\Delta E_{\text{tot}}$ | $\Delta E_{\text{def}}$       | $\Delta E_{\text{int}}$       | $\Delta E_{\text{elstat}}$       | $\Delta E_{\text{oi}}$       | $\Delta E_{\text{disp}}$       | $\Delta E_{\text{Pauli}}$       |
|---------------------------------------------|-------------------------|-------------------------------|-------------------------------|----------------------------------|------------------------------|--------------------------------|---------------------------------|
| <i>aa</i>                                   | -110.10                 | 21.79                         | -131.89                       | -133.27                          | -153.87                      | -47.32                         | 202.57                          |
|                                             | <i>-107.74</i>          | <i>20.69</i>                  | <i>-128.43</i>                | <i>-64.82</i>                    | <i>-223.85</i>               | <i>-47.89</i>                  | <i>208.13</i>                   |
| <i>ga</i>                                   | -118.66                 | 21.05                         | -139.71                       | -143.77                          | -158.52                      | -47.05                         | 209.63                          |
|                                             | <i>-110.65</i>          | <i>20.35</i>                  | <i>-131.00</i>                | <i>-75.03</i>                    | <i>-221.53</i>               | <i>-48.20</i>                  | <i>213.76</i>                   |
| <i>a</i> FEAH                               | -99.18                  | 11.22                         | -110.40                       | -131.03                          | -151.97                      | -29.64                         | 202.24                          |
| <i>g</i> FEAH                               | -106.02                 | 11.56                         | -117.58                       | -140.48                          | -155.52                      | -29.78                         | 208.20                          |
| Isomerization                               | $\Delta E_{\text{iso}}$ | $\Delta\Delta E_{\text{def}}$ | $\Delta\Delta E_{\text{int}}$ | $\Delta\Delta E_{\text{elstat}}$ | $\Delta\Delta E_{\text{oi}}$ | $\Delta\Delta E_{\text{disp}}$ | $\Delta\Delta E_{\text{Pauli}}$ |
| <i>aa</i> $\rightarrow$ <i>ga</i>           | -8.57                   | -0.75                         | -7.82                         | -10.50                           | -4.65                        | 0.27                           | 7.06                            |
|                                             | <i>-2.91</i>            | <i>-0.34</i>                  | <i>-2.57</i>                  | <i>-10.21</i>                    | <i>2.32</i>                  | <i>-0.31</i>                   | <i>5.63</i>                     |
|                                             |                         |                               |                               | (69.3)                           | (30.7)                       |                                |                                 |
|                                             |                         |                               |                               | (97.1)                           |                              | (2.9)                          |                                 |
| <i>a</i> 2FEAH $\rightarrow$ <i>g</i> 2FEAH | -6.84                   | 0.34                          | -7.18                         | -9.45                            | -3.55                        | -0.14                          | 5.96                            |
|                                             |                         |                               |                               | (71.9)                           | (27.0)                       | (1.1)                          |                                 |

<sup>a</sup> Labeling of various energy terms is the same as in Table 2. Values in italic are in  $\text{H}_2\text{O}$ . Values in parentheses are percentage contribution to all attractive interactions. <sup>b</sup>From ref. 3f.

**Table S9.** Energies of vicinal hyperconjugative interactions between  $N_3CH_2$  and  $CH_2NH_3^+$  fragments in the most stable  $CC_{anti}$  and the most stable  $CC_{gauche}$  isomer of 2-azidoethylammonium cation and their changes upon conformational isomerization, estimated on the basis of second-order perturbative approach at the HF/6-311++G(d,p) level.<sup>a</sup> Energies are in kcal/mol.

| Conformer             | total         | total <sub>gauche</sub> | total <sub>anti</sub> | $\sigma_{CH} \rightarrow \sigma_{CH}^*$ | $\sigma_{CN_3} \rightarrow \sigma_{CNH_3}^*$ /<br>$\sigma_{CNH_3} \rightarrow \sigma_{CN_3}^*$ | $\sigma_{CH} \rightarrow \sigma_{CN_3}^*$ /<br>$\sigma_{CH} \rightarrow \sigma_{CNH_3}^*$ | $\sigma_{CN_3} \rightarrow \sigma_{CH}^*$ /<br>$\sigma_{CNH_3} \rightarrow \sigma_{CH}^*$ |
|-----------------------|---------------|-------------------------|-----------------------|-----------------------------------------|------------------------------------------------------------------------------------------------|-------------------------------------------------------------------------------------------|-------------------------------------------------------------------------------------------|
| <i>aa</i>             | -20.47        | -4.02                   | -16.45                | -2.83/-2.80/-3.04/-3.05                 | -3.55/-1.18                                                                                    |                                                                                           |                                                                                           |
|                       | <i>-20.14</i> | <i>-4.05</i>            | <i>-16.09</i>         | <i>-2.90/-2.91/-2.97/-2.93</i>          | <i>-2.84/-1.54</i>                                                                             |                                                                                           |                                                                                           |
| <i>ga</i>             | -20.48        | -3.99                   | -16.49                | -2.86/-2.96                             |                                                                                                | -2.60/-5.34                                                                               | -1.58/-1.15                                                                               |
|                       | <i>-21.68</i> | <i>-3.98</i>            | <i>-17.70</i>         | <i>-3.07/-3.05</i>                      |                                                                                                | <i>-3.52/-5.49</i>                                                                        | <i>-1.37/-1.20</i>                                                                        |
| Isomerization         |               |                         |                       |                                         |                                                                                                |                                                                                           |                                                                                           |
| <i>aa</i> → <i>ga</i> | -0.01         | 0.03                    | -0.04                 |                                         |                                                                                                |                                                                                           |                                                                                           |
|                       | <i>-1.54</i>  | <i>0.07</i>             | <i>-1.61</i>          |                                         |                                                                                                |                                                                                           |                                                                                           |

<sup>a</sup> Individual interactions correspond to *anti* vicinal hyperconjugation. Total<sub>anti</sub> is the sum of six interactions between *anti*-related  $\sigma$ -bonds. Total<sub>gauche</sub> is the sum of twelve interactions between *gauche*-related  $\sigma$ -bonds. Total is the sum of all vicinal hyperconjugations, that is total<sub>anti</sub> + total<sub>gauche</sub>. Values in italic are from H<sub>2</sub>O.

**Table S10.** Relative energies ( $\Delta E$ ), enthalpies ( $\Delta H$ ) and free energies ( $\Delta G$ ) for fourteen conformers of 2-azidoethanol in the gas-phase and in solvents ( $\text{CH}_2\text{Cl}_2$ , DMSO and  $\text{H}_2\text{O}$ ) and energy changes ( $\Delta\Delta$  values) upon conformational isomerizations, obtained at the MP2/6-311++G(d,p) level. All values are in kcal/mol.

| Conformer                                                              | gas/ $\text{CH}_2\text{Cl}_2$ /DMSO/ $\text{H}_2\text{O}$ |                                |                                |
|------------------------------------------------------------------------|-----------------------------------------------------------|--------------------------------|--------------------------------|
|                                                                        | $\Delta E$                                                | $\Delta H$                     | $\Delta G$                     |
| <i>aaa</i> , $C_1$                                                     | 2.49/2.23/2.24/2.25                                       | 2.36/2.13/2.19/2.20            | <b>1.24/1.13/1.20/1.20</b>     |
| <i>aag</i> , $C_1$                                                     | 2.82/2.13/2.04/2.04                                       | 2.81/2.21/2.16/2.15            | 2.44/1.78/1.62/1.60            |
| <i>gaa</i> , $C_1$                                                     | <b>2.39</b> /2.03/2.03/2.04                               | <b>2.36/2.01</b> /2.06/2.06    | 1.97/1.59/1.48/1.47            |
| <i>gag</i> , $C_1$                                                     | 2.75/1.96/ <b>1.85/1.84</b>                               | 2.81/2.03/ <b>1.96/1.96</b>    | 2.82/2.01/1.84/1.82            |
| <i>gag</i> <sup>-</sup> , $C_1$                                        | 2.69/ <b>1.93</b> /1.85/1.85                              | 2.77/2.08/2.03/2.03            | 2.78/2.13/1.95/1.93            |
| <i>aga</i> , $C_1$                                                     | - /1.44/1.22/1.20                                         | - /1.30/1.11/1.09              | - /0.76/0.37/0.35              |
| <i>agg</i> , $C_1$                                                     | 3.44/1.67/1.32/1.29                                       | 3.32/1.63/1.32/1.29            | 2.98/1.41/0.88/0.82            |
| <i>ag</i> <sup>-</sup> <i>g</i> , $C_1$                                | <b>0.00/0.00</b> /0.05/0.07                               | <b>0.00/0.00</b> /0.09/0.10    | <b>0.00/0.00/0.00/0.00</b>     |
| <i>gga</i> , $C_1$                                                     | 2.76/1.45/1.21/1.19                                       | 2.67/1.38/1.19/1.17            | 2.44/1.17/0.91/0.88            |
| <i>ggg</i> , $C_1$                                                     | 2.69/1.33/1.08/1.06                                       | 2.72/1.43/1.22/1.20            | 2.84/1.53/1.26/1.22            |
| <i>ggg</i> <sup>-</sup> , $C_1$                                        | 0.60/0.32/0.30/0.31                                       | 0.68/0.41/0.43/0.43            | 1.05/0.83/0.74/0.73            |
| <i>gg</i> <sup>-</sup> <i>a</i> , $C_1$                                | 0.70/0.06/ <b>0.00/0.00</b>                               | 0.63/0.01/ <b>0.00/0.00</b>    | 0.83/0.17/0.08/0.07            |
| <i>gg</i> <sup>-</sup> <i>g</i> <sup>-</sup> , $C_1$                   | 1.58/0.35/0.12/0.11                                       | 1.56/0.42/0.23/0.21            | 1.94/0.88/0.60/0.57            |
| <i>gg</i> <sup>-</sup> <i>g</i> , $C_1$                                | 1.41/- /- /-                                              | 1.29/- /- /-                   | 0.96/- /- /-                   |
| Isomerization                                                          | $\Delta\Delta E$                                          | $\Delta\Delta H$               | $\Delta\Delta G$               |
| <i>aaa</i> → <i>aga</i>                                                | - /-0.79/-1.02/-1.05                                      | - /-0.83/-1.08/-1.11           | - /-0.37/-0.83/-0.85           |
| <i>aag</i> → <i>agg</i>                                                | 0.62/-0.46/-0.72/-0.75                                    | 0.51/-0.58/-0.84/-0.87         | 0.54/-0.37/-0.74/-0.78         |
| <i>aag</i> → <i>ag</i> <sup>-</sup> <i>g</i>                           | -2.82/-2.13/-1.99/-1.97                                   | -2.81/-2.21/-2.07/-2.05        | -2.44/-1.78/-1.62/-1.60        |
| <i>gaa</i> → <i>gga</i>                                                | 0.37/-0.58/-0.82/-0.85                                    | 0.32/-0.63/-0.87/-0.90         | 0.47/-0.42/-0.56/-0.59         |
| <i>gaa</i> → <i>gg</i> <sup>-</sup> <i>a</i>                           | -1.69/-1.98/-2.03/-2.04                                   | -1.73/-2.00/-2.06/-2.06        | -1.14/-1.42/-1.40/-1.40        |
| <i>gag</i> → <i>ggg</i>                                                | -0.06/-0.63/-0.77/-0.79                                   | -0.09/-0.61/-0.74/-0.76        | 0.02/-0.48/-0.58/-0.60         |
| <i>gag</i> → <i>gg</i> <sup>-</sup> <i>g</i>                           | -1.34/- /- /-                                             | -1.52/- /- /-                  | -1.86/- /- /-                  |
| <i>gag</i> <sup>-</sup> → <i>ggg</i> <sup>-</sup>                      | -2.09/-1.61/-1.55/-1.54                                   | -2.10/-1.66/-1.60/-1.59        | -1.73/-1.29/-1.21/-1.20        |
| <i>gag</i> <sup>-</sup> → <i>gg</i> <sup>-</sup> <i>g</i> <sup>-</sup> | -1.11/-1.59/-1.73/-1.74                                   | -1.22/-1.66/-1.80/-1.81        | -0.84/-1.24/-1.34/-1.35        |
| <i>anti</i> → <i>gauche</i> <sup>a</sup>                               | <b>-2.39/-1.93/-1.85/-1.84</b>                            | <b>-2.36/-2.01/-1.96/-1.96</b> | <b>-1.24/-1.13/-1.20/-1.20</b> |

<sup>a</sup> Energy difference between the most stable  $\text{CC}_{gauche}$  and the most stable  $\text{CC}_{anti}$  conformer (bolded numbers for each energy term).

**Table S11.** Contribution of various energy components to the total binding interactions between  $\text{N}_3\text{CH}_2\cdot$  and  $\cdot\text{CH}_2\text{OH}$  fragments and energy changes ( $\Delta\Delta\text{E}$  values) occurring upon conformational isomerization.<sup>a</sup> Data for 2-fluoroethanol (2FE) are included for comparison.<sup>b</sup> Values are in kcal/mol, obtained at the MP2/6-311++G(d,p) level.

| Conformer                                                              | $\Delta\text{E}_{\text{tot}}$ | $\Delta\text{E}_{\text{def}}$       | $\Delta\text{E}_{\text{int}}$       | $\Delta\text{E}_{\text{elstat}}$       | $\Delta\text{E}_{\text{oi}}$       | $\Delta\text{E}_{\text{disp}}$       | $\Delta\text{E}_{\text{Pauli}}$       |
|------------------------------------------------------------------------|-------------------------------|-------------------------------------|-------------------------------------|----------------------------------------|------------------------------------|--------------------------------------|---------------------------------------|
| <i>aag</i>                                                             | -102.68                       | 22.06                               | -124.74                             | -154.60                                | -154.83                            | -46.05                               | 230.74                                |
| <i>gaa</i>                                                             | -103.13                       | 20.91                               | -124.04                             | -153.63                                | -154.67                            | -49.63                               | 233.89                                |
| <i>gag</i>                                                             | -102.77                       | 14.61                               | -117.38                             | -157.64                                | -156.44                            | -47.42                               | 244.12                                |
|                                                                        | <i>-102.67</i>                | <i>14.21</i>                        | <i>-116.90</i>                      | <i>-148.73</i>                         | <i>-164.13</i>                     | <i>-47.21</i>                        | <i>243.17</i>                         |
| <i>gag</i> <sup>-</sup>                                                | -102.83                       | 14.43                               | -117.26                             | -157.96                                | -156.42                            | -47.09                               | 244.21                                |
| <i>agg</i>                                                             | -102.06                       | 21.59                               | -123.65                             | -154.16                                | -156.39                            | -45.59                               | 232.49                                |
| <i>ag</i> <sup>-</sup> <i>g</i>                                        | -105.47                       | 22.07                               | -127.54                             | -158.96                                | -156.96                            | -46.57                               | 234.95                                |
| <i>gga</i>                                                             | -102.73                       | 21.39                               | -124.12                             | -154.35                                | -155.94                            | -49.46                               | 235.63                                |
| <i>ggg</i>                                                             | -102.84                       | 15.92                               | -118.76                             | -158.62                                | -156.52                            | -46.94                               | 243.32                                |
| <i>ggg</i> <sup>-</sup>                                                | -104.95                       | 15.26                               | -120.21                             | -162.16                                | -158.35                            | -48.23                               | 248.53                                |
| <i>gg</i> <sup>-</sup> <i>a</i>                                        | -104.76                       | 20.63                               | -125.39                             | -157.12                                | -157.53                            | -50.37                               | 239.63                                |
|                                                                        | <i>-104.55</i>                | <i>20.25</i>                        | <i>-124.78</i>                      | <i>-149.74</i>                         | <i>-164.32</i>                     | <i>-50.58</i>                        | <i>239.86</i>                         |
| <i>gg</i> <sup>-</sup> <i>g</i> <sup>-</sup>                           | -103.91                       | 14.55                               | -118.46                             | -160.83                                | -158.91                            | -48.09                               | 249.37                                |
| <i>gg</i> <sup>-</sup> <i>g</i>                                        | -104.07                       | 14.41                               | -118.48                             | -160.49                                | -159.36                            | -47.79                               | 249.16                                |
| <i>ag</i> <sup>-</sup> 2FE                                             | -93.76                        | 10.91                               | -104.67                             | -155.52                                | -157.32                            | -25.64                               | 233.81                                |
| <i>gg</i> <sup>-</sup> 2FE                                             | -96.30                        | 11.48                               | -107.78                             | -160.86                                | -160.35                            | -26.15                               | 239.58                                |
| Isomerization                                                          | $\Delta\text{E}_{\text{iso}}$ | $\Delta\Delta\text{E}_{\text{def}}$ | $\Delta\Delta\text{E}_{\text{int}}$ | $\Delta\Delta\text{E}_{\text{elstat}}$ | $\Delta\Delta\text{E}_{\text{oi}}$ | $\Delta\Delta\text{E}_{\text{disp}}$ | $\Delta\Delta\text{E}_{\text{Pauli}}$ |
| <i>aag</i> → <i>agg</i>                                                | 0.62                          | -0.47                               | 1.09                                | 0.44                                   | -1.56                              | 0.46                                 | 1.75                                  |
| <i>aag</i> → <i>ag</i> <sup>-</sup> <i>g</i>                           | -2.82                         | -0.02                               | -2.80                               | -4.36                                  | -2.13                              | -0.52                                | 4.21                                  |
|                                                                        |                               |                                     |                                     | (62.2)                                 | (30.4)                             | (7.4)                                |                                       |
| <i>gaa</i> → <i>gga</i>                                                | 0.37                          | 0.45                                | -0.08                               | -0.72                                  | -1.27                              | 0.17                                 | 1.74                                  |
|                                                                        |                               |                                     |                                     | (36.2)                                 | (63.8)                             |                                      |                                       |
| <i>gaa</i> → <i>gg</i> <sup>-</sup> <i>a</i>                           | -1.69                         | -0.34                               | -1.35                               | -3.49                                  | -2.86                              | -0.74                                | 5.74                                  |
|                                                                        |                               |                                     |                                     | (49.2)                                 | (40.3)                             | (10.5)                               |                                       |
| <i>gag</i> → <i>ggg</i>                                                | -0.06                         | 1.32                                | -1.38                               | -0.98                                  | -0.08                              | 0.48                                 | -0.80                                 |
|                                                                        |                               |                                     |                                     | (52.7)                                 | (4.3)                              |                                      | (43.0)                                |
| <i>gag</i> → <i>gg</i> <sup>-</sup> <i>g</i>                           | -1.34                         | -0.24                               | -1.10                               | -2.85                                  | -2.92                              | -0.37                                | 5.04                                  |
|                                                                        |                               |                                     |                                     | (46.4)                                 | (47.6)                             | (6.0)                                |                                       |
| <i>gag</i> <sup>-</sup> → <i>ggg</i> <sup>-</sup>                      | -2.09                         | 0.86                                | -2.95                               | -4.20                                  | -1.93                              | -1.14                                | 4.32                                  |
|                                                                        |                               |                                     |                                     | (57.8)                                 | (26.5)                             | (15.7)                               |                                       |
| <i>gag</i> <sup>-</sup> → <i>gg</i> <sup>-</sup> <i>g</i> <sup>-</sup> | -1.11                         | 0.09                                | -1.20                               | -2.87                                  | -2.49                              | -1.00                                | 5.16                                  |
|                                                                        |                               |                                     |                                     | (45.1)                                 | (39.2)                             | (15.7)                               |                                       |
| <i>ag</i> <sup>-</sup> 2FE → <i>gg</i> <sup>-</sup> 2FE                | -2.54                         | 0.57                                | -3.11                               | -5.34                                  | -3.03                              | -0.51                                | 5.77                                  |
|                                                                        |                               |                                     |                                     | (60.1)                                 | (34.1)                             | (5.8)                                |                                       |
| <i>gaa</i> → <i>gg</i> <sup>-</sup> <i>a</i>                           | -1.69                         | -0.34                               | -1.35                               | -3.49                                  | -2.86                              | -0.74                                | 5.74                                  |
| <i>gg</i> <sup>-</sup> <i>a</i> → <i>ag</i> <sup>-</sup> <i>g</i>      | -0.70                         | 1.45                                | -2.15                               | -1.84                                  | 0.57                               | 3.80                                 | -4.68                                 |
| <i>gaa</i> → <i>ag</i> <sup>-</sup> <i>g</i> <sup>c</sup>              | -2.39                         | 1.11                                | -3.50                               | -5.33                                  | -2.29                              | 3.06                                 | 1.06                                  |

|                                                 |       |       |       |        |       |        |        |
|-------------------------------------------------|-------|-------|-------|--------|-------|--------|--------|
| <i>gaa</i> → <i>aag</i>                         | 0.43  | 1.13  | -0.70 | -0.97  | -0.16 | 3.58   | -3.15  |
| <i>aag</i> → <i>ag<sup>-</sup>g</i>             | -2.82 | -0.02 | -2.80 | -4.36  | -2.13 | -0.52  | 4.21   |
| <i>gaa</i> → <i>ag<sup>-</sup>g<sup>c</sup></i> | -2.39 | 1.11  | -3.50 | -5.33  | -2.29 | 3.06   | 1.06   |
| <i>gag</i> → <i>gg<sup>-</sup>a<sup>c</sup></i> | -1.84 | 6.04  | -7.88 | -1.01  | -0.19 | -3.37  | -3.31  |
|                                                 |       |       |       | (12.8) | (2.4) | (42.8) | (42.0) |

<sup>a</sup> Labeling of various energy terms is the same as in Table 2. Values in italic are in H<sub>2</sub>O. Values in parentheses are percentage contribution to all attractive interactions. <sup>b</sup>From ref. 3f. <sup>c</sup>Corresponds to the most stable CC<sub>anti</sub> → the most stable CC<sub>gauche</sub> isomerization.

**Table S12.** Energies of vicinal hyperconjugative interactions between N<sub>3</sub>CH<sub>2</sub> and CH<sub>2</sub>OH fragments in 2-azidoethanol and their change upon conformational isomerization, estimated on the basis of second-order perturbative approach at the HF/6-311++G(d,p) level.<sup>a</sup> Energies are in kcal/mol.

| Conformer                                                   | total  | total <sub>gauche</sub> | total <sub>anti</sub> | $\sigma_{\text{CH}} \rightarrow \sigma_{\text{CH}}^*$ | $\sigma_{\text{CN}_3} \rightarrow \sigma_{\text{COH}}^*/\sigma_{\text{COH}} \rightarrow \sigma_{\text{CN}_3}^*$ | $\sigma_{\text{CH}} \rightarrow \sigma_{\text{CN}_3}^*/\sigma_{\text{CH}} \rightarrow \sigma_{\text{COH}}^*$ | $\sigma_{\text{CN}_3} \rightarrow \sigma_{\text{CH}}^*/\sigma_{\text{COH}} \rightarrow \sigma_{\text{CH}}^*$ |
|-------------------------------------------------------------|--------|-------------------------|-----------------------|-------------------------------------------------------|-----------------------------------------------------------------------------------------------------------------|--------------------------------------------------------------------------------------------------------------|--------------------------------------------------------------------------------------------------------------|
| <i>aag</i>                                                  | -20.05 | -3.88                   | -16.17                | -3.49/-3.25/-2.77/-2.86                               | -2.18/-1.62                                                                                                     |                                                                                                              |                                                                                                              |
| <i>gaa</i>                                                  | -20.13 | -4.13                   | -16.00                | -3.32/-2.98/-2.79/-2.97                               | -1.87/-2.07                                                                                                     |                                                                                                              |                                                                                                              |
| <i>gag</i>                                                  | -19.93 | -3.78                   | -16.15                | -3.58/-2.96/-2.72/-2.99                               | -2.13/-1.77                                                                                                     |                                                                                                              |                                                                                                              |
| <i>gag<sup>-</sup></i>                                      | -19.86 | -3.77                   | -16.09                | -3.28/-3.23/-2.83/-2.87                               | -2.12/-1.76                                                                                                     |                                                                                                              |                                                                                                              |
| <i>ag<sup>-</sup>g</i>                                      | -21.62 | -3.85                   | -17.77                | -3.52/-2.92                                           |                                                                                                                 | -4.11/-4.74                                                                                                  | -1.26/-1.22                                                                                                  |
| <i>gg<sup>-</sup>a</i>                                      | -21.92 | -4.05                   | -17.87                | -3.41/-3.01                                           |                                                                                                                 | -4.50/-4.41                                                                                                  | -1.21/-1.33                                                                                                  |
| <i>gg<sup>-</sup>g</i>                                      | -21.97 | -3.55                   | -18.42                | -3.47/-2.96                                           |                                                                                                                 | -4.74/-5.00                                                                                                  | -1.16/-1.09                                                                                                  |
| <i>ggg<sup>-</sup></i>                                      | -22.15 | -3.79                   | -18.36                | -3.28/-3.08                                           |                                                                                                                 | -4.82/-4.65                                                                                                  | -1.28/-1.25                                                                                                  |
| <i>gg<sup>-</sup>g<sup>-</sup></i>                          | -22.16 | -3.67                   | -18.49                | -3.72/-2.89                                           |                                                                                                                 | -4.47/-5.12                                                                                                  | -1.20/-1.09                                                                                                  |
| Isomerization                                               |        |                         |                       |                                                       |                                                                                                                 |                                                                                                              |                                                                                                              |
| <i>aag</i> → <i>ag<sup>-</sup>g</i>                         | -1.57  | 0.03                    | -1.60                 |                                                       |                                                                                                                 |                                                                                                              |                                                                                                              |
| <i>gaa</i> → <i>gg<sup>-</sup>a</i>                         | -1.79  | 0.08                    | -1.87                 |                                                       |                                                                                                                 |                                                                                                              |                                                                                                              |
| <i>gag</i> → <i>gg<sup>-</sup>g</i>                         | -2.04  | 0.23                    | -2.27                 |                                                       |                                                                                                                 |                                                                                                              |                                                                                                              |
| <i>gag<sup>-</sup></i> → <i>ggg<sup>-</sup></i>             | -2.29  | -0.02                   | -2.27                 |                                                       |                                                                                                                 |                                                                                                              |                                                                                                              |
| <i>gag<sup>-</sup></i> → <i>gg<sup>-</sup>g<sup>-</sup></i> | -2.30  | 0.10                    | -2.40                 |                                                       |                                                                                                                 |                                                                                                              |                                                                                                              |

<sup>a</sup> Individual interactions correspond to *anti* vicinal hyperconjugation. Total<sub>anti</sub> is the sum of six interactions between *anti*-related  $\sigma$ -bonds. Total<sub>gauche</sub> is the sum of twelve interactions between *gauche*-related  $\sigma$ -bonds. Total is the sum of all vicinal hyperconjugations, that is total<sub>anti</sub> + total<sub>gauche</sub>.

**Table S13.** Relative energies ( $\Delta E$ ), enthalpies ( $\Delta H$ ) and free energies ( $\Delta G$ ) for conformers of protonated 2-azidoethanol in the gas-phase and in solvents ( $\text{CH}_2\text{Cl}_2$ , DMSO and  $\text{H}_2\text{O}$ ) and energy changes ( $\Delta\Delta$  values) upon conformational isomerizations, obtained at the MP2/6-311++G(d,p) level. All values are in kcal/mol.

| Conformer                                         | gas/ $\text{CH}_2\text{Cl}_2$ /DMSO/ $\text{H}_2\text{O}$ |                                 |                                 |
|---------------------------------------------------|-----------------------------------------------------------|---------------------------------|---------------------------------|
|                                                   | $\Delta E$                                                | $\Delta H$                      | $\Delta G$                      |
| <i>aaa</i> , $C_1$                                | 13.26/5.80/4.80/4.71                                      | 14.10/6.53/5.23/5.10            | 12.62/6.34/4.66/4.45            |
| <i>aag</i> , $C_1$                                | <b>12.73/5.48/4.57/4.48</b>                               | <b>13.60/5.95/4.97/4.89</b>     | <b>12.16/5.31/4.39/4.33</b>     |
| <i>gaa</i> , $C_1$                                | - /5.82/4.70/4.59                                         | - /6.37/4.97/4.87               | - /5.91/4.30/4.30               |
| <i>gag</i> , $C_1$                                | - /5.56/4.53/4.43                                         | - /6.01/4.94/4.82               | - /5.46/4.42/4.17               |
| <i>gag</i> <sup>-</sup> , $C_1$                   | - /5.49/ <b>4.43/4.33</b>                                 | - /6.01/ <b>4.83/4.71</b>       | - /5.29/ <b>4.17/4.12</b>       |
| <i>aga</i> , $C_1$                                | 1.27/0.73/0.59/0.57                                       | 1.40/0.83/0.67/0.64             | 1.16/0.80/0.70/0.67             |
| <i>agg</i> , $C_1$                                | <b>0.00/0.00/0.00/0.00</b>                                | <b>0.00/0.00/0.00/0.00</b>      | <b>0.00/0.00/0.00/0.00</b>      |
| <i>ag</i> <sup>-</sup> <i>g</i> , $C_1$           | - /3.15/2.33/2.25                                         | - /3.54/2.64/2.54               | - /3.11/2.28/2.14               |
| <i>gga</i> , $C_1$                                | - /1.54/1.31/1.28                                         | - /1.69/1.36/1.31               | - /1.61/1.32/1.24               |
| <i>ggg</i> , $C_1$                                | - /0.99/0.77/0.75                                         | - /0.95/0.74/0.73               | - /0.76/0.58/0.53               |
| <i>ggg</i> <sup>-</sup> , $C_1$                   | - /3.72/2.77/2.68                                         | - /4.12/2.98/2.83               | - /3.67/2.27/1.61               |
| <i>gg</i> <sup>-</sup> <i>g</i> , $C_1$           | - /3.63/2.56/2.45                                         | - /3.84/2.71/2.60               | - /3.29/2.42/2.39               |
| Isomerization                                     |                                                           |                                 |                                 |
| <i>aaa</i> → <i>aga</i>                           | -11.99/-5.06/-4.22/-4.14                                  | -12.70/-5.70/-4.56/-4.46        | -11.46/-5.54/-3.95/-3.78        |
| <i>aag</i> → <i>agg</i>                           | -12.73/-5.48/-4.57/-4.48                                  | -13.60/-5.95/-4.97/-4.89        | -12.16/-5.31/-4.39/-4.33        |
| <i>aag</i> → <i>ag</i> <sup>-</sup> <i>g</i>      | - /-2.33/-2.24/-2.23                                      | - /-2.41/-2.33/-2.35            | - /-2.20/-2.11/-2.19            |
| <i>gaa</i> → <i>gga</i>                           | - /-4.28/-3.40/-3.31                                      | - /-4.67/-3.61/-3.56            | - /-4.30/-2.98/-3.06            |
| <i>gag</i> → <i>ggg</i>                           | - /-4.57/-3.76/-3.68                                      | - /-5.06/-4.19/-4.09            | - /-4.70/-3.84/-3.64            |
| <i>gag</i> → <i>gg</i> <sup>-</sup> <i>g</i>      | - /-1.87/-1.97/-1.98                                      | - /-2.16/-2.23/-2.21            | - /-2.00/-2.00/-1.78            |
| <i>gag</i> <sup>-</sup> → <i>ggg</i> <sup>-</sup> | - /-1.77/-1.66/-1.65                                      | - /-1.89/-1.85/-1.88            | - /-1.62/-1.90/-2.51            |
| <i>anti</i> → <i>gauche</i> <sup>a</sup>          | <b>-12.73/-5.48/-4.43/-4.33</b>                           | <b>-13.60/-5.95/-4.83/-4.71</b> | <b>-12.16/-5.29/-4.17/-4.12</b> |

<sup>a</sup> Energy difference between the most stable  $\text{CC}_{\text{gauche}}$  and the most stable  $\text{CC}_{\text{anti}}$  conformer (bolded numbers for each energy term).

**Table S14.** Contribution of various energy components to the total binding interactions between  $\text{N}_3\text{CH}_2^+$  and  $\cdot\text{CH}_2\text{OH}_2^+$  fragments in the most stable  $\text{CC}_{anti}$  and  $\text{CC}_{gauche}$  forms of protonated 2-azidoethanol and energy changes ( $\Delta\Delta\text{E}$  values) occurring upon conformational isomerization.<sup>a</sup> Data for protonated 2-fluoroethanol (2FEH) are included for comparison.<sup>b</sup> Values are in kcal/mol, obtained at the MP2/6-311++G(d,p) level.

| Conformer                                         | $\Delta\text{E}_{\text{tot}}$ | $\Delta\text{E}_{\text{def}}$       | $\Delta\text{E}_{\text{int}}$       | $\Delta\text{E}_{\text{elstat}}$       | $\Delta\text{E}_{\text{oi}}$       | $\Delta\text{E}_{\text{disp}}$       | $\Delta\text{E}_{\text{Pauli}}$       |
|---------------------------------------------------|-------------------------------|-------------------------------------|-------------------------------------|----------------------------------------|------------------------------------|--------------------------------------|---------------------------------------|
| <i>aag</i>                                        | -112.30                       | 16.31                               | -128.61                             | -131.08                                | -159.24                            | -39.53                               | 201.24                                |
| <i>agg</i>                                        | -124.96                       | 25.57                               | -150.71                             | -152.11                                | -177.53                            | -46.89                               | 225.82                                |
| <i>ag</i> 2FEH                                    | -100.54                       | 12.03                               | -112.57                             | -128.21                                | -145.83                            | -28.43                               | 198.90                                |
| <i>gg</i> 2FEH                                    | -108.77                       | 12.84                               | -121.61                             | -140.53                                | -160.23                            | -29.27                               | 208.42                                |
| <i>gag</i> <sup>-</sup>                           | <i>-106.32</i>                | <i>15.13</i>                        | <i>-121.45</i>                      | <i>-61.94</i>                          | <i>-233.35</i>                     | <i>-47.54</i>                        | <i>221.38</i>                         |
| <i>ggg</i> <sup>-</sup>                           | <i>-107.97</i>                | <i>15.72</i>                        | <i>-123.69</i>                      | <i>-65.68</i>                          | <i>-233.82</i>                     | <i>-48.04</i>                        | <i>223.85</i>                         |
| <i>agg</i>                                        | <i>-110.65</i>                | <i>20.61</i>                        | <i>-131.26</i>                      | <i>-74.47</i>                          | <i>-226.94</i>                     | <i>-45.84</i>                        | <i>215.99</i>                         |
| Isomerization                                     | $\Delta\text{E}_{\text{iso}}$ | $\Delta\Delta\text{E}_{\text{def}}$ | $\Delta\Delta\text{E}_{\text{int}}$ | $\Delta\Delta\text{E}_{\text{elstat}}$ | $\Delta\Delta\text{E}_{\text{oi}}$ | $\Delta\Delta\text{E}_{\text{disp}}$ | $\Delta\Delta\text{E}_{\text{Pauli}}$ |
| <i>aag</i> → <i>agg</i> <sup>c</sup>              | -12.73                        | 9.37                                | -22.10                              | -21.03<br>(45.1)                       | -18.29<br>(39.2)                   | -7.36<br>(15.7)                      | 24.58                                 |
| <i>ag</i> 2FEH → <i>gg</i> 2FEH                   | -8.23                         | 0.81                                | -9.04                               | -12.32<br>(66.4)                       | -5.40<br>(29.1)                    | -0.84<br>(4.5)                       | 9.52                                  |
| <i>gag</i> <sup>-</sup> → <i>ggg</i> <sup>-</sup> | <i>-1.65</i>                  | <i>0.59</i>                         | <i>-2.24</i>                        | <i>-3.74</i><br>(79.4)                 | <i>-0.47</i><br>(10.0)             | <i>-0.50</i><br>(10.6)               | <i>2.47</i>                           |
| <i>ggg</i> <sup>-</sup> → <i>agg</i>              | -2.68                         | 4.89                                | -7.57                               | -8.79<br>(52.8)                        | 6.88                               | 2.20                                 | -7.86<br>(47.2)                       |
| <i>gag</i> <sup>-</sup> → <i>agg</i> <sup>c</sup> | -4.33                         | 5.48                                | -9.81                               | -12.53                                 | 6.41                               | 1.70                                 | -5.39                                 |

<sup>a</sup> Labeling of various energy terms is the same as in Table 2. Values in italic are in  $\text{H}_2\text{O}$ . Values in parentheses are percentage contribution to all attractive interactions. <sup>b</sup>From ref. 3f. <sup>c</sup>Corresponds to the most stable  $\text{CC}_{anti}$  → the most stable  $\text{CC}_{gauche}$  isomerization.

**Table S15.** Energies of vicinal hyperconjugative interactions between  $\text{N}_3\text{CH}_2$  and  $\text{CH}_2\text{OH}_2^+$  fragments in protonated 2-azidoethanol and their changes upon conformational isomerization, estimated on the basis of second-order perturbative approach at the HF/6-311++G(d,p) level.<sup>a</sup> Energies are in kcal/mol.

| Conformer               | total  | total <sub>gauche</sub> | total <sub>anti</sub> | $\sigma_{\text{CH}} \rightarrow \sigma_{\text{CH}}^*$ | $\sigma_{\text{CN3}} \rightarrow \sigma_{\text{COH2}}^*$ /<br>$\sigma_{\text{COH2}} \rightarrow \sigma_{\text{CN3}}^*$ | $\sigma_{\text{CH}} \rightarrow \sigma_{\text{CN3}}^*$ /<br>$\sigma_{\text{CH}} \rightarrow \sigma_{\text{COH2}}^*$ | $\sigma_{\text{CN3}} \rightarrow \sigma_{\text{CH}}^*$ /<br>$\sigma_{\text{COH2}} \rightarrow \sigma_{\text{CH}}^*$ |
|-------------------------|--------|-------------------------|-----------------------|-------------------------------------------------------|------------------------------------------------------------------------------------------------------------------------|---------------------------------------------------------------------------------------------------------------------|---------------------------------------------------------------------------------------------------------------------|
| <i>aaa</i>              | -21.52 | -4.22                   | -17.30                | -2.68/-2.54/-2.92/-2.88                               | -5.32/-0.96                                                                                                            |                                                                                                                     |                                                                                                                     |
| <i>aag</i>              | -21.17 | -4.56                   | -16.61                | -2.43/-2.55/-2.93/-2.80                               | -4.82/-1.08                                                                                                            |                                                                                                                     |                                                                                                                     |
| <i>aga</i>              | -18.47 | -4.69                   | -13.78                | -2.52/-2.34                                           |                                                                                                                        | -1.81/-4.91                                                                                                         | -1.27/-0.93                                                                                                         |
| <i>agg</i>              | -18.95 | -4.95                   | -14.00                | -2.40/-2.51                                           |                                                                                                                        | -1.85/-4.59                                                                                                         | -1.59/-1.06                                                                                                         |
| Isomerization           |        |                         |                       |                                                       |                                                                                                                        |                                                                                                                     |                                                                                                                     |
| <i>aaa</i> → <i>aga</i> | 3.05   | -0.47                   | 3.52                  |                                                       |                                                                                                                        |                                                                                                                     |                                                                                                                     |
| <i>aag</i> → <i>agg</i> | 2.22   | -0.39                   | 2.61                  |                                                       |                                                                                                                        |                                                                                                                     |                                                                                                                     |

<sup>a</sup> Individual interactions correspond to *anti* vicinal hyperconjugation. Total<sub>anti</sub> is the sum of six interactions between *anti*-related  $\sigma$ -bonds. Total<sub>gauche</sub> is the sum of twelve interactions between *gauche*-related  $\sigma$ -bonds. Total is the sum of all vicinal hyperconjugations, that is total<sub>anti</sub> + total<sub>gauche</sub>.

**Table S16.** Relative energies ( $\Delta E$ ), enthalpies ( $\Delta H$ ) and free energies ( $\Delta G$ ) for nine conformers of *N*-(2-azidoethyl)ethanamide in the gas-phase and in solvents ( $\text{CH}_2\text{Cl}_2$ , DMSO and  $\text{H}_2\text{O}$ ) and energy changes ( $\Delta\Delta$  values) upon conformational isomerizations, obtained at the MP2/6-311++G(d,p) level. All values are in kcal/mol.

| Conformer                                                              | gas/ $\text{CH}_2\text{Cl}_2$ /DMSO/ $\text{H}_2\text{O}$ |                                |                                |
|------------------------------------------------------------------------|-----------------------------------------------------------|--------------------------------|--------------------------------|
|                                                                        | $\Delta E$                                                | $\Delta H$                     | $\Delta G$                     |
| <i>aag</i> , $C_1$                                                     | 3.07/2.38/2.18/2.17                                       | 3.00/2.35/2.20/2.22            | <b>1.34/0.99/1.10/1.08</b>     |
| <i>gag</i> , $C_1$                                                     | <b>2.68/1.90/1.75/1.74</b>                                | <b>2.70/1.99/1.85/1.88</b>     | 1.45/1.36/1.28/1.26            |
| <i>gag</i> <sup>-</sup> , $C_1$                                        | 3.13/2.21/1.97/1.95                                       | 3.13/2.28/2.06/2.08            | 1.85/1.63/1.52/1.51            |
| <i>agg</i> , $C_1$                                                     | 0.91/0.97/1.00/1.02                                       | 0.94/0.97/1.00/1.05            | <b>0.00/0.28/0.30/0.30</b>     |
| <i>ag</i> <sup>-</sup> <i>g</i> , $C_1$                                | 3.81/2.03/1.54/1.50                                       | 3.71/2.00/1.50/1.49            | 3.09/1.63/1.01/0.93            |
| <i>ggg</i> , $C_1$                                                     | 1.59/1.17/1.06/1.06                                       | 1.65/1.23/1.11/1.14            | 0.82/0.73/0.43/0.41            |
| <i>ggg</i> <sup>-</sup> , $C_1$                                        | 2.21/0.76/0.37/0.34                                       | 2.16/0.84/0.46/0.46            | 2.26/1.14/0.70/0.65            |
| <i>gg</i> <sup>-</sup> <i>g</i> <sup>-</sup> , $C_1$                   | <b>0.00/0.00/0.00/0.01</b>                                | <b>0.00/0.00/0.02/0.06</b>     | 0.11/ <b>0.00/0.00/0.00</b>    |
| <i>gg</i> <sup>-</sup> <i>g</i> , $C_1$                                | 1.70/0.42/0.03/ <b>0.00</b>                               | 1.58/0.37/ <b>0.00/0.00</b>    | 1.76/0.94/0.53/0.48            |
| Isomerization                                                          |                                                           |                                |                                |
| <i>aag</i> → <i>agg</i>                                                | -2.16/-1.41/-1.18/-1.15                                   | -2.06/-1.38/-1.19/-1.17        | -1.34/-0.71/-0.80/-0.79        |
| <i>aag</i> → <i>ag</i> <sup>-</sup> <i>g</i>                           | 0.74/-0.35/-0.64/-0.67                                    | 0.71/-0.35/-0.70/-0.73         | 0.76/0.64/-0.09/-0.15          |
| <i>gag</i> → <i>ggg</i>                                                | -1.09/-0.73/-0.68/-0.68                                   | -1.05/-0.76/-0.74/-0.73        | -0.62/-0.62/-0.84/-0.85        |
| <i>gag</i> → <i>gg</i> <sup>-</sup> <i>g</i>                           | -0.98/-1.48/-1.71/-1.74                                   | -1.12/-1.62/-1.85/-1.88        | 0.31/-0.41/-0.75/-0.79         |
| <i>gag</i> <sup>-</sup> → <i>ggg</i> <sup>-</sup>                      | -0.92/-1.45/-1.60/-1.62                                   | -0.97/-1.44/-1.60/-1.62        | 0.41/-0.49/-0.82/-0.86         |
| <i>gag</i> <sup>-</sup> → <i>gg</i> <sup>-</sup> <i>g</i> <sup>-</sup> | -3.13/-2.21/-1.97/-1.94                                   | -3.13/-2.28/-2.04/-2.02        | -1.74/-1.63/-1.52/-1.51        |
| <i>anti</i> → <i>gauche</i> <sup>a</sup>                               | <b>-2.68/-1.90/-1.75/-1.74</b>                            | <b>-2.70/-1.99/-1.85/-1.88</b> | <b>-1.34/-0.99/-1.10/-1.08</b> |

<sup>a</sup> Energy difference between the most stable  $\text{CC}_{\text{gauche}}$  and the most stable  $\text{CC}_{\text{anti}}$  conformer (bolded numbers for each energy term).



**Table S17.** Contribution of various energy components to the total binding interactions between  $\text{N}_3\text{CH}_2^-$  and  $\text{CH}_2\text{NHAc}$  fragments and energy changes ( $\Delta\Delta\text{E}$  values) occurring upon conformational isomerization.<sup>a</sup> Values are in kcal/mol, obtained at the MP2/6-311++G(d,p) level.

| Conformer                                                   | $\Delta\text{E}_{\text{tot}}$ | $\Delta\text{E}_{\text{def}}$       | $\Delta\text{E}_{\text{int}}$       | $\Delta\text{E}_{\text{elstat}}$       | $\Delta\text{E}_{\text{oi}}$       | $\Delta\text{E}_{\text{disp}}$       | $\Delta\text{E}_{\text{Pauli}}$       |
|-------------------------------------------------------------|-------------------------------|-------------------------------------|-------------------------------------|----------------------------------------|------------------------------------|--------------------------------------|---------------------------------------|
| <i>aag</i>                                                  | -102.21                       | 24.67                               | -126.88                             | -153.36                                | -153.61                            | -48.77                               | 228.86                                |
| <i>gag</i>                                                  | -102.62                       | 16.68                               | -119.30                             | -156.67                                | -154.80                            | -49.59                               | 241.76                                |
|                                                             | <i>-101.96</i>                | <i>15.90</i>                        | <i>-117.87</i>                      | <i>-144.14</i>                         | <i>-167.08</i>                     | <i>-49.20</i>                        | <i>242.55</i>                         |
| <i>gag<sup>-</sup></i>                                      | -102.19                       | 16.82                               | -119.01                             | -156.04                                | -154.61                            | -49.87                               | 241.51                                |
| <i>agg</i>                                                  | -104.38                       | 25.06                               | -129.44                             | -157.26                                | -154.88                            | -50.27                               | 232.82                                |
| <i>ag<sup>-</sup>g</i>                                      | -101.46                       | 25.92                               | -127.38                             | -153.58                                | -154.14                            | -50.89                               | 231.23                                |
| <i>ggg</i>                                                  | -103.74                       | 16.76                               | -120.50                             | -159.88                                | -155.92                            | -50.27                               | 245.57                                |
| <i>ggg<sup>-</sup></i>                                      | -103.10                       | 16.05                               | -119.15                             | -158.65                                | -155.57                            | -50.34                               | 245.41                                |
| <i>gg<sup>-</sup>g<sup>-</sup></i>                          | -105.25                       | 17.22                               | -122.47                             | -159.25                                | -156.61                            | -53.08                               | 246.47                                |
| <i>gg<sup>-</sup>g</i>                                      | -103.56                       | 17.65                               | -121.21                             | -158.39                                | -156.64                            | -53.89                               | 247.71                                |
|                                                             | <i>-103.73</i>                | <i>17.49</i>                        | <i>-121.20</i>                      | <i>-144.15</i>                         | <i>-171.63</i>                     | <i>-53.42</i>                        | <i>248.00</i>                         |
| Isomerization                                               | $\Delta\text{E}_{\text{iso}}$ | $\Delta\Delta\text{E}_{\text{def}}$ | $\Delta\Delta\text{E}_{\text{int}}$ | $\Delta\Delta\text{E}_{\text{elstat}}$ | $\Delta\Delta\text{E}_{\text{oi}}$ | $\Delta\Delta\text{E}_{\text{disp}}$ | $\Delta\Delta\text{E}_{\text{Pauli}}$ |
| <i>aag</i> → <i>agg</i>                                     | -2.16                         | 0.40                                | -2.56                               | -3.90                                  | -1.27                              | -1.35                                | 3.96                                  |
|                                                             |                               |                                     |                                     | (59.8)                                 | (19.5)                             | (20.7)                               |                                       |
| <i>aag</i> → <i>ag<sup>-</sup>g</i>                         | 0.74                          | 1.24                                | -0.50                               | -0.22                                  | -0.53                              | -2.12                                | 2.37                                  |
|                                                             |                               |                                     |                                     | (7.7)                                  | (18.5)                             | (73.8)                               |                                       |
| <i>gag</i> → <i>ggg</i>                                     | -1.09                         | 0.11                                | -1.20                               | -3.21                                  | -1.12                              | -0.68                                | 3.81                                  |
|                                                             |                               |                                     |                                     | (64.1)                                 | (22.4)                             | (13.5)                               |                                       |
| <i>gag</i> → <i>gg<sup>-</sup>g</i>                         | -0.98                         | 0.93                                | -1.91                               | -1.72                                  | -1.84                              | -4.30                                | 5.95                                  |
|                                                             |                               |                                     |                                     | (21.9)                                 | (23.4)                             | (54.7)                               |                                       |
|                                                             | <i>-1.74</i>                  | <i>1.59</i>                         | <i>-3.33</i>                        | <i>-0.01</i>                           | <i>-4.55</i>                       | <i>-4.22</i>                         | <i>5.45</i>                           |
|                                                             |                               |                                     |                                     | (0.1)                                  | (51.8)                             | (48.1)                               |                                       |
| <i>gag<sup>-</sup></i> → <i>ggg<sup>-</sup></i>             | -0.92                         | -0.78                               | -0.14                               | -2.61                                  | -0.96                              | -0.47                                | 3.90                                  |
|                                                             |                               |                                     |                                     | (64.6)                                 | (23.8)                             | (11.6)                               |                                       |
| <i>gag<sup>-</sup></i> → <i>gg<sup>-</sup>g<sup>-</sup></i> | -3.13                         | 0.33                                | -3.46                               | -3.21                                  | -2.00                              | -3.21                                | 4.96                                  |
|                                                             |                               |                                     |                                     | (38.1)                                 | (23.8)                             | (38.1)                               |                                       |
| <i>gag</i> → <i>gg<sup>-</sup>g</i>                         | -0.98                         | 0.93                                | -1.91                               | -1.72                                  | -1.84                              | -4.30                                | 5.95                                  |
| <i>gg<sup>-</sup>g</i> → <i>gg<sup>-</sup>g<sup>-</sup></i> | -1.70                         | -0.44                               | -1.26                               | -0.86                                  | 0.03                               | 0.81                                 | -1.24                                 |
| <i>gag</i> → <i>gg<sup>-</sup>g<sup>-b</sup></i>            | -2.68                         | 0.49                                | -3.17                               | -2.58                                  | -1.81                              | -3.49                                | 4.71                                  |
| <i>gag</i> → <i>gag<sup>-</sup></i>                         | 0.45                          | 0.16                                | 0.29                                | 0.63                                   | 0.19                               | -0.28                                | -0.25                                 |
| <i>gag<sup>-</sup></i> → <i>gg<sup>-</sup>g<sup>-</sup></i> | -3.13                         | 0.33                                | -3.46                               | -3.21                                  | -2.00                              | -3.21                                | 4.96                                  |
| <i>gag</i> → <i>gg<sup>-</sup>g<sup>-b</sup></i>            | -2.68                         | 0.49                                | -3.17                               | -2.58                                  | -1.81                              | -3.49                                | 4.71                                  |

<sup>a</sup> Labeling of various energy terms is the same as in Table 2. Values in italic are in  $\text{H}_2\text{O}$ . Values in parentheses are percentage contribution to all attractive interactions. <sup>b</sup>Corresponds to the most stable  $\text{CC}_{\text{anti}}$  → the most stable  $\text{CC}_{\text{gauche}}$  isomerization.

**Table S18.** Energies of vicinal hyperconjugative interactions between  $N_3CH_2$  and  $CH_2NHAc$  fragments in *N*-(2-azidoethyl)ethanamide and their change upon conformational isomerization, estimated on the basis of second-order perturbative approach at the HF/6-311++G(d,p) level.<sup>a</sup> Energies are in kcal/mol.

| Conformer                                                              | total  | total <sub>gauche</sub> | total <sub>anti</sub> | $\sigma_{CH} \rightarrow \sigma_{CH}^*$ | $\sigma_{CN_3} \rightarrow \sigma_{CNHAc}^*$ /<br>$\sigma_{CNHAc} \rightarrow \sigma_{CN_3}^*$ | $\sigma_{CH} \rightarrow \sigma_{CN_3}^*$ /<br>$\sigma_{CH} \rightarrow \sigma_{CNHAc}^*$ | $\sigma_{CN_3} \rightarrow \sigma_{CH}^*$ /<br>$\sigma_{CNHAc} \rightarrow \sigma_{CH}^*$ |
|------------------------------------------------------------------------|--------|-------------------------|-----------------------|-----------------------------------------|------------------------------------------------------------------------------------------------|-------------------------------------------------------------------------------------------|-------------------------------------------------------------------------------------------|
| <i>aag</i>                                                             | -19.56 | -3.69                   | -15.87                | -2.90/-3.28/-3.04/-2.94                 | -2.21/-1.50                                                                                    |                                                                                           |                                                                                           |
| <i>gag</i>                                                             | -19.19 | -3.44                   | -15.75                | -2.93/-3.01/-3.01/-3.09                 | -2.04/-1.67                                                                                    |                                                                                           |                                                                                           |
| <i>gag</i> <sup>-</sup>                                                | -19.22 | -3.52                   | -15.70                | -3.34/-2.62/-2.82/-3.23                 | -1.95/-1.67                                                                                    |                                                                                           |                                                                                           |
| <i>agg</i>                                                             | -20.65 | -3.51                   | -17.14                | -3.09/-3.10                             |                                                                                                | -4.01/-4.44                                                                               | -1.29/-1.24                                                                               |
| <i>ggg</i>                                                             | -21.03 | -3.34                   | -17.69                | -2.83/-3.32                             |                                                                                                | -4.68/-4.63                                                                               | -1.23/-1.20                                                                               |
| <i>ggg</i> <sup>-</sup>                                                | -20.91 | -3.19                   | -17.72                | -3.21/-3.15                             |                                                                                                | -4.49/-4.50                                                                               | -1.21/-1.16                                                                               |
| <i>gg</i> <sup>-</sup> <i>g</i> <sup>-</sup>                           | -20.66 | -3.27                   | -17.39                | -3.09/-2.99                             |                                                                                                | -4.50/-4.56                                                                               | -1.22/-1.03                                                                               |
| <i>gg</i> <sup>-</sup> <i>g</i>                                        | -21.13 | -3.45                   | -17.68                | -3.54/-2.88                             |                                                                                                | -4.44/-4.56                                                                               | -1.21/-1.05                                                                               |
| Isomerization                                                          |        |                         |                       |                                         |                                                                                                |                                                                                           |                                                                                           |
| <i>aag</i> → <i>agg</i>                                                | -1.09  | 0.18                    | -1.27                 |                                         |                                                                                                |                                                                                           |                                                                                           |
| <i>gag</i> → <i>ggg</i>                                                | -1.84  | 0.10                    | -1.94                 |                                         |                                                                                                |                                                                                           |                                                                                           |
| <i>gag</i> → <i>gg</i> <sup>-</sup> <i>g</i>                           | -1.94  | -0.01                   | -1.93                 |                                         |                                                                                                |                                                                                           |                                                                                           |
| <i>gag</i> <sup>-</sup> → <i>ggg</i> <sup>-</sup>                      | -1.69  | 0.33                    | -2.02                 |                                         |                                                                                                |                                                                                           |                                                                                           |
| <i>gag</i> <sup>-</sup> → <i>gg</i> <sup>-</sup> <i>g</i> <sup>-</sup> | -1.44  | 0.25                    | -1.69                 |                                         |                                                                                                |                                                                                           |                                                                                           |

<sup>a</sup> Individual interactions correspond to *anti* vicinal hyperconjugation. Total<sub>anti</sub> is the sum of six interactions between *anti*-related  $\sigma$ -bonds. Total<sub>gauche</sub> is the sum of twelve interactions between *gauche*-related  $\sigma$ -bonds. Total is the sum of all vicinal hyperconjugations, that is total<sub>anti</sub> + total<sub>gauche</sub>.

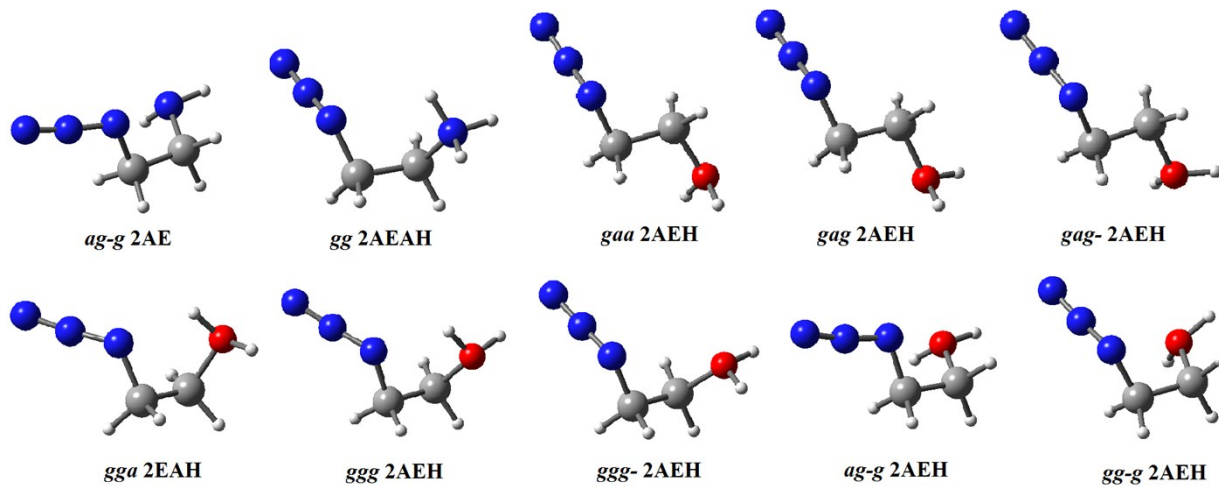

**Figure S1.** Optimized structures of isomers which are viable only in solvents (2AE: 2-azidoethanamine, in DMSO; 2AEAH: 2-azidoethylammonium ion, in  $\text{CH}_2\text{Cl}_2$ ; 2AEH: protonated 2-azidoethanol, in  $\text{CH}_2\text{Cl}_2$ ).

# Absolute energies (a.u.) and x,y,z coordinates (Å) of optimized structures

## Gas-phase

### 1,2-Diazidoethane

*aaa*, E = -406.1931001 a.u.

| Center Number | Atomic Number | Atomic Type | Coordinates (Angstroms) |           |           |
|---------------|---------------|-------------|-------------------------|-----------|-----------|
|               |               |             | X                       | Y         | Z         |
| 1             | 6             | 0           | -0.392131               | 0.648500  | 0.089922  |
| 2             | 1             | 0           | -1.053476               | 0.678566  | 0.963125  |
| 3             | 1             | 0           | -0.999367               | 0.718517  | -0.819391 |
| 4             | 6             | 0           | 0.392131                | -0.648500 | 0.089922  |
| 5             | 1             | 0           | 0.999367                | -0.718517 | -0.819391 |
| 6             | 1             | 0           | 1.053476                | -0.678566 | 0.963125  |
| 7             | 7             | 0           | 0.601382                | 1.737049  | 0.150272  |
| 8             | 7             | 0           | 0.146174                | 2.872289  | -0.044045 |
| 9             | 7             | 0           | -0.146174               | 3.977155  | -0.203837 |
| 10            | 7             | 0           | -0.601382               | -1.737049 | 0.150272  |
| 11            | 7             | 0           | -0.146174               | -2.872289 | -0.044045 |
| 12            | 7             | 0           | 0.146174                | -3.977155 | -0.203837 |

*aag*, E = -406.1931737 a.u.

| Center Number | Atomic Number | Atomic Type | Coordinates (Angstroms) |           |           |
|---------------|---------------|-------------|-------------------------|-----------|-----------|
|               |               |             | X                       | Y         | Z         |
| 1             | 6             | 0           | -0.396383               | 0.023885  | 0.234218  |
| 2             | 1             | 0           | -0.517906               | 0.065169  | 1.322712  |
| 3             | 1             | 0           | -0.100062               | -0.993522 | -0.051697 |
| 4             | 6             | 0           | 0.666280                | 1.023460  | -0.196519 |
| 5             | 1             | 0           | 0.767906                | 1.015696  | -1.287784 |
| 6             | 1             | 0           | 0.387115                | 2.027237  | 0.122066  |
| 7             | 7             | 0           | -1.643287               | 0.405332  | -0.456815 |
| 8             | 7             | 0           | -2.657208               | -0.188532 | -0.063684 |
| 9             | 7             | 0           | -3.672073               | -0.667537 | 0.205146  |
| 10            | 7             | 0           | 1.953499                | 0.732410  | 0.459428  |
| 11            | 7             | 0           | 2.530046                | -0.286262 | 0.048695  |
| 12            | 7             | 0           | 3.180959                | -1.195218 | -0.240126 |

*gag*, E = -406.1933327 a.u.

| Center Number | Atomic Number | Atomic Type | Coordinates (Angstroms) |           |           |
|---------------|---------------|-------------|-------------------------|-----------|-----------|
|               |               |             | X                       | Y         | Z         |
| 1             | 6             | 0           | -0.745854               | 0.164269  | -0.696479 |
| 2             | 1             | 0           | -1.000291               | 0.726072  | -1.595021 |
| 3             | 1             | 0           | -1.006495               | 0.770030  | 0.181082  |
| 4             | 6             | 0           | 0.745854                | -0.164269 | -0.696479 |
| 5             | 1             | 0           | 1.006495                | -0.770030 | 0.181082  |
| 6             | 1             | 0           | 1.000291                | -0.726072 | -1.595021 |
| 7             | 7             | 0           | -1.559430               | -1.064415 | -0.738490 |

|    |   |   |           |           |           |
|----|---|---|-----------|-----------|-----------|
| 8  | 7 | 0 | -1.559430 | -1.722749 | 0.313369  |
| 9  | 7 | 0 | -1.661278 | -2.425294 | 1.224094  |
| 10 | 7 | 0 | 1.559430  | 1.064415  | -0.738490 |
| 11 | 7 | 0 | 1.559430  | 1.722749  | 0.313369  |
| 12 | 7 | 0 | 1.661278  | 2.425294  | 1.224094  |

-----  
**gag<sup>-</sup>**, E = -406.1932421 a.u.  
 -----

| Center<br>Number | Atomic<br>Number | Atomic<br>Type | Coordinates (Angstroms) |           |           |
|------------------|------------------|----------------|-------------------------|-----------|-----------|
|                  |                  |                | X                       | Y         | Z         |
| 1                | 6                | 0              | 0.364319                | -0.615404 | 0.267235  |
| 2                | 1                | 0              | 0.364673                | -0.614970 | 1.358492  |
| 3                | 1                | 0              | 1.402901                | -0.614856 | -0.083019 |
| 4                | 6                | 0              | -0.364319               | 0.615404  | -0.267235 |
| 5                | 1                | 0              | -0.364673               | 0.614970  | -1.358492 |
| 6                | 1                | 0              | -1.402901               | 0.614856  | 0.083019  |
| 7                | 7                | 0              | -0.330916               | -1.854737 | -0.125585 |
| 8                | 7                | 0              | -0.246061               | -2.137365 | -1.330644 |
| 9                | 7                | 0              | -0.242874               | -2.527594 | -2.417214 |
| 10               | 7                | 0              | 0.330916                | 1.854737  | 0.125585  |
| 11               | 7                | 0              | 0.246061                | 2.137365  | 1.330644  |
| 12               | 7                | 0              | 0.242874                | 2.527594  | 2.417214  |

-----  
**aga**, E = -406.1936685 a.u.  
 -----

| Center<br>Number | Atomic<br>Number | Atomic<br>Type | Coordinates (Angstroms) |           |           |
|------------------|------------------|----------------|-------------------------|-----------|-----------|
|                  |                  |                | X                       | Y         | Z         |
| 1                | 6                | 0              | -0.292630               | -0.696986 | 1.117079  |
| 2                | 1                | 0              | -0.039286               | -1.202426 | 2.056564  |
| 3                | 1                | 0              | -1.382869               | -0.632062 | 1.025339  |
| 4                | 6                | 0              | 0.292630                | 0.696986  | 1.117079  |
| 5                | 1                | 0              | 0.039286                | 1.202426  | 2.056564  |
| 6                | 1                | 0              | 1.382869                | 0.632062  | 1.025339  |
| 7                | 7                | 0              | -0.292630               | 1.427276  | -0.022068 |
| 8                | 7                | 0              | 0.383949                | 2.374732  | -0.443643 |
| 9                | 7                | 0              | 0.292630                | -1.427276 | -0.022068 |
| 10               | 7                | 0              | -0.383949               | -2.374732 | -0.443643 |
| 11               | 7                | 0              | 0.914242                | 3.275492  | -0.932057 |
| 12               | 7                | 0              | -0.914242               | -3.275492 | -0.932057 |

-----  
**agg**, E = -406.1932735 a.u.  
 -----

| Center<br>Number | Atomic<br>Number | Atomic<br>Type | Coordinates (Angstroms) |           |           |
|------------------|------------------|----------------|-------------------------|-----------|-----------|
|                  |                  |                | X                       | Y         | Z         |
| 1                | 6                | 0              | -0.906857               | 1.389773  | 0.080560  |
| 2                | 1                | 0              | -1.550880               | 1.767528  | 0.884861  |
| 3                | 1                | 0              | -0.681371               | 2.207731  | -0.603671 |
| 4                | 6                | 0              | 0.378055                | 0.850487  | 0.681890  |
| 5                | 1                | 0              | 0.830843                | 1.622951  | 1.316330  |
| 6                | 1                | 0              | 0.165672                | -0.027350 | 1.306767  |
| 7                | 7                | 0              | 1.284137                | 0.500126  | -0.424592 |
| 8                | 7                | 0              | 2.182869                | -0.301430 | -0.134906 |

|    |   |   |           |           |           |
|----|---|---|-----------|-----------|-----------|
| 9  | 7 | 0 | -1.625843 | 0.389286  | -0.727665 |
| 10 | 7 | 0 | -1.956749 | -0.633710 | -0.112494 |
| 11 | 7 | 0 | 3.064319  | -1.033664 | -0.000669 |
| 12 | 7 | 0 | -2.318940 | -1.636668 | 0.331898  |

-----  
**agg<sup>-</sup>**, E = -406.1958291 a.u.  
 -----

| Center<br>Number | Atomic<br>Number | Atomic<br>Type | Coordinates (Angstroms) |           |           |
|------------------|------------------|----------------|-------------------------|-----------|-----------|
|                  |                  |                | X                       | Y         | Z         |
| 1                | 6                | 0              | 1.033889                | 1.392405  | 0.231114  |
| 2                | 1                | 0              | 1.419543                | 2.364914  | -0.078897 |
| 3                | 1                | 0              | 1.182225                | 1.281201  | 1.311880  |
| 4                | 6                | 0              | -0.446126               | 1.310399  | -0.091526 |
| 5                | 1                | 0              | -0.974266               | 2.153448  | 0.372226  |
| 6                | 1                | 0              | -0.586919               | 1.344468  | -1.177997 |
| 7                | 7                | 0              | -0.937327               | 0.032527  | 0.459318  |
| 8                | 7                | 0              | -2.045148               | -0.332759 | 0.043763  |
| 9                | 7                | 0              | 1.820014                | 0.398373  | -0.514066 |
| 10               | 7                | 0              | 1.752665                | -0.768283 | -0.092924 |
| 11               | 7                | 0              | -3.064509               | -0.780577 | -0.259095 |
| 12               | 7                | 0              | 1.821854                | -1.886546 | 0.182326  |

-----  
**ggg<sup>-</sup>**, E = -406.1937411 a.u.  
 -----

| Center<br>Number | Atomic<br>Number | Atomic<br>Type | Coordinates (Angstroms) |           |           |
|------------------|------------------|----------------|-------------------------|-----------|-----------|
|                  |                  |                | X                       | Y         | Z         |
| 1                | 6                | 0              | -0.716793               | -0.260402 | 1.053264  |
| 2                | 1                | 0              | -0.873040               | -0.877350 | 1.948005  |
| 3                | 1                | 0              | -1.429096               | 0.566374  | 1.081719  |
| 4                | 6                | 0              | 0.716793                | 0.260402  | 1.053264  |
| 5                | 1                | 0              | 0.873040                | 0.877350  | 1.948005  |
| 6                | 1                | 0              | 1.429096                | -0.566374 | 1.081719  |
| 7                | 7                | 0              | 1.052576                | 1.012300  | -0.167066 |
| 8                | 7                | 0              | 0.306309                | 1.971417  | -0.410543 |
| 9                | 7                | 0              | -1.052576               | -1.012300 | -0.167066 |
| 10               | 7                | 0              | -0.306309               | -1.971417 | -0.410543 |
| 11               | 7                | 0              | -0.306309               | 2.886692  | -0.758006 |
| 12               | 7                | 0              | 0.306309                | -2.886692 | -0.758006 |

-----  
**g<sup>-</sup>gg<sup>-</sup>**, E = -406.1960389 a.u.  
 -----

| Center<br>Number | Atomic<br>Number | Atomic<br>Type | Coordinates (Angstroms) |           |           |
|------------------|------------------|----------------|-------------------------|-----------|-----------|
|                  |                  |                | X                       | Y         | Z         |
| 1                | 6                | 0              | 1.149653                | 1.324984  | 0.051007  |
| 2                | 1                | 0              | 1.736177                | 2.101338  | -0.444953 |
| 3                | 1                | 0              | 1.442416                | 1.276711  | 1.106030  |
| 4                | 6                | 0              | -0.332390               | 1.666461  | -0.058035 |
| 5                | 1                | 0              | -0.513318               | 2.638547  | 0.406913  |
| 6                | 1                | 0              | -0.625047               | 1.715673  | -1.112584 |
| 7                | 7                | 0              | -1.161132               | 0.695829  | 0.677947  |
| 8                | 7                | 0              | -1.586385               | -0.258925 | 0.008610  |
| 9                | 7                | 0              | 1.475156                | 0.069764  | -0.644266 |

|    |   |   |           |           |           |
|----|---|---|-----------|-----------|-----------|
| 10 | 7 | 0 | 1.236831  | -0.969994 | -0.007895 |
| 11 | 7 | 0 | -2.059291 | -1.189256 | -0.484297 |
| 12 | 7 | 0 | 1.102849  | -2.016124 | 0.462296  |

-----  
**ggg**, E = -406.1956305 a.u.

| Center<br>Number | Atomic<br>Number | Atomic<br>Type | Coordinates (Angstroms) |           |           |
|------------------|------------------|----------------|-------------------------|-----------|-----------|
|                  |                  |                | X                       | Y         | Z         |
| 1                | 6                | 0              | -0.455534               | 1.490525  | -0.389206 |
| 2                | 1                | 0              | -1.240285               | 2.143256  | 0.015518  |
| 3                | 1                | 0              | -0.011787               | 1.965160  | -1.264222 |
| 4                | 6                | 0              | 0.615332                | 1.255164  | 0.669228  |
| 5                | 1                | 0              | 1.016096                | 2.215135  | 1.000432  |
| 6                | 1                | 0              | 0.186403                | 0.744279  | 1.542224  |
| 7                | 7                | 0              | 1.761789                | 0.503439  | 0.139399  |
| 8                | 7                | 0              | 1.563070                | -0.708435 | -0.045316 |
| 9                | 7                | 0              | -1.031338               | 0.224660  | -0.881508 |
| 10               | 7                | 0              | -1.673019               | -0.418487 | -0.037436 |
| 11               | 7                | 0              | 1.545479                | -1.846241 | -0.239186 |
| 12               | 7                | 0              | -2.295868               | -1.118073 | 0.639179  |

## 2-Azidoethanamine

**aaa**, E = -298.1418011 a.u.

| Center<br>Number | Atomic<br>Number | Atomic<br>Type | Coordinates (Angstroms) |           |           |
|------------------|------------------|----------------|-------------------------|-----------|-----------|
|                  |                  |                | X                       | Y         | Z         |
| 1                | 6                | 0              | -1.499081               | 0.736702  | 0.000000  |
| 2                | 1                | 0              | -1.945313               | 0.266175  | 0.880166  |
| 3                | 1                | 0              | -1.945313               | 0.266175  | -0.880166 |
| 4                | 6                | 0              | 0.000000                | 0.457283  | 0.000000  |
| 5                | 1                | 0              | 0.464681                | 0.899471  | -0.891198 |
| 6                | 1                | 0              | 0.464681                | 0.899471  | 0.891198  |
| 7                | 7                | 0              | 0.189361                | -1.009780 | 0.000000  |
| 8                | 7                | 0              | 1.368633                | -1.384237 | 0.000000  |
| 9                | 7                | 0              | 2.420225                | -1.862078 | 0.000000  |
| 10               | 7                | 0              | -1.847969               | 2.150787  | 0.000000  |
| 11               | 1                | 0              | -1.477998               | 2.620980  | 0.818923  |
| 12               | 1                | 0              | -1.477998               | 2.620980  | -0.818923 |

-----  
**aag**, E = -298.1422118 a.u.

| Center<br>Number | Atomic<br>Number | Atomic<br>Type | Coordinates (Angstroms) |           |           |
|------------------|------------------|----------------|-------------------------|-----------|-----------|
|                  |                  |                | X                       | Y         | Z         |
| 1                | 6                | 0              | 1.578301                | 0.496007  | -0.044005 |
| 2                | 1                | 0              | 1.577205                | 1.198243  | 0.800750  |
| 3                | 1                | 0              | 1.558983                | 1.084828  | -0.964353 |
| 4                | 6                | 0              | 0.315297                | -0.344189 | 0.024321  |
| 5                | 1                | 0              | 0.233009                | -0.959696 | -0.877977 |
| 6                | 1                | 0              | 0.351551                | -1.007449 | 0.898417  |
| 7                | 7                | 0              | -0.833263               | 0.579780  | 0.142918  |

|    |   |   |           |           |           |
|----|---|---|-----------|-----------|-----------|
| 8  | 7 | 0 | -1.944619 | 0.053391  | 0.008670  |
| 9  | 7 | 0 | -3.035777 | -0.311357 | -0.093802 |
| 10 | 7 | 0 | 2.733941  | -0.397746 | -0.088510 |
| 11 | 1 | 0 | 3.570913  | 0.111684  | -0.347643 |
| 12 | 1 | 0 | 2.904779  | -0.806991 | 0.823980  |

-----  
***gaa***, E = -298.1422683 a.u.  
 -----

| Center<br>Number | Atomic<br>Number | Atomic<br>Type | Coordinates (Angstroms) |           |           |
|------------------|------------------|----------------|-------------------------|-----------|-----------|
|                  |                  |                | X                       | Y         | Z         |
| 1                | 6                | 0              | 1.194424                | -0.348147 | -0.376710 |
| 2                | 1                | 0              | 1.204244                | -0.181801 | -1.457428 |
| 3                | 1                | 0              | 0.676766                | -1.297294 | -0.202367 |
| 4                | 6                | 0              | 0.405442                | 0.784587  | 0.284666  |
| 5                | 1                | 0              | 0.364038                | 0.634386  | 1.371935  |
| 6                | 1                | 0              | 0.885111                | 1.745535  | 0.090458  |
| 7                | 7                | 0              | -0.959651               | 0.909794  | -0.267824 |
| 8                | 7                | 0              | -1.714670               | -0.038488 | -0.012211 |
| 9                | 7                | 0              | -2.526320               | -0.843743 | 0.156285  |
| 10               | 7                | 0              | 2.567727                | -0.486356 | 0.088501  |
| 11               | 1                | 0              | 3.099839                | 0.358541  | -0.089685 |
| 12               | 1                | 0              | 2.601206                | -0.666454 | 1.086089  |

-----  
***gag***, E = -298.1424994 a.u.  
 -----

| Center<br>Number | Atomic<br>Number | Atomic<br>Type | Coordinates (Angstroms) |           |           |
|------------------|------------------|----------------|-------------------------|-----------|-----------|
|                  |                  |                | X                       | Y         | Z         |
| 1                | 6                | 0              | -1.183509               | -0.368995 | 0.331280  |
| 2                | 1                | 0              | -1.143382               | -0.282628 | 1.426018  |
| 3                | 1                | 0              | -0.696822               | -1.310208 | 0.056244  |
| 4                | 6                | 0              | -0.400772               | 0.789763  | -0.275126 |
| 5                | 1                | 0              | -0.357972               | 0.680079  | -1.364363 |
| 6                | 1                | 0              | -0.885521               | 1.739642  | -0.043109 |
| 7                | 7                | 0              | 0.957468                | 0.897839  | 0.297651  |
| 8                | 7                | 0              | 1.715907                | -0.040325 | 0.017847  |
| 9                | 7                | 0              | 2.528778                | -0.840586 | -0.167200 |
| 10               | 7                | 0              | -2.532877               | -0.373863 | -0.229932 |
| 11               | 1                | 0              | -3.013707               | -1.236966 | -0.002585 |
| 12               | 1                | 0              | -3.081842               | 0.384017  | 0.162301  |

-----  
***gag<sup>-</sup>***, E = -298.1424243 a.u.  
 -----

| Center<br>Number | Atomic<br>Number | Atomic<br>Type | Coordinates (Angstroms) |           |           |
|------------------|------------------|----------------|-------------------------|-----------|-----------|
|                  |                  |                | X                       | Y         | Z         |
| 1                | 6                | 0              | 1.201519                | -0.309609 | -0.390991 |
| 2                | 1                | 0              | 1.265543                | -0.096310 | -1.461068 |
| 3                | 1                | 0              | 0.662452                | -1.262102 | -0.275264 |
| 4                | 6                | 0              | 0.398706                | 0.802797  | 0.272790  |
| 5                | 1                | 0              | 0.357962                | 0.648616  | 1.359325  |
| 6                | 1                | 0              | 0.870173                | 1.765538  | 0.080143  |
| 7                | 7                | 0              | -0.968828               | 0.899500  | -0.277991 |
| 8                | 7                | 0              | -1.710631               | -0.055548 | -0.011796 |



|    |   |   |           |           |           |
|----|---|---|-----------|-----------|-----------|
| 9  | 7 | 0 | -2.511875 | -0.869179 | 0.166019  |
| 10 | 7 | 0 | 2.552145  | -0.319186 | 0.166029  |
| 11 | 1 | 0 | 2.549764  | -0.705315 | 1.104265  |
| 12 | 1 | 0 | 3.167082  | -0.898669 | -0.394029 |

-----  
**aga**, E = -298.1440541 a.u.  
 -----

| Center<br>Number | Atomic<br>Number | Atomic<br>Type | Coordinates (Angstroms) |           |           |
|------------------|------------------|----------------|-------------------------|-----------|-----------|
|                  |                  |                | X                       | Y         | Z         |
| 1                | 6                | 0              | -1.745098               | 0.495856  | -0.198174 |
| 2                | 1                | 0              | -1.801322               | 0.638825  | -1.281333 |
| 3                | 1                | 0              | -2.410465               | 1.232869  | 0.262800  |
| 4                | 6                | 0              | -0.320970               | 0.790767  | 0.255958  |
| 5                | 1                | 0              | -0.037656               | 1.818531  | -0.005748 |
| 6                | 1                | 0              | -0.237240               | 0.664264  | 1.343590  |
| 7                | 7                | 0              | 0.568963                | -0.171263 | -0.432180 |
| 8                | 7                | 0              | 1.751968                | -0.143386 | -0.071187 |
| 9                | 7                | 0              | 2.878454                | -0.212968 | 0.174251  |
| 10               | 7                | 0              | -2.235780               | -0.837493 | 0.114295  |
| 11               | 1                | 0              | -1.610550               | -1.532875 | -0.280624 |
| 12               | 1                | 0              | -2.251588               | -0.985581 | 1.118355  |

-----  
**agg**, E = -298.1448704 a.u.  
 -----

| Center<br>Number | Atomic<br>Number | Atomic<br>Type | Coordinates (Angstroms) |           |           |
|------------------|------------------|----------------|-------------------------|-----------|-----------|
|                  |                  |                | X                       | Y         | Z         |
| 1                | 6                | 0              | 1.746055                | 0.487262  | 0.171759  |
| 2                | 1                | 0              | 1.825320                | 0.645749  | 1.257260  |
| 3                | 1                | 0              | 2.419265                | 1.194462  | -0.322387 |
| 4                | 6                | 0              | 0.329801                | 0.810085  | -0.256076 |
| 5                | 1                | 0              | 0.079976                | 1.849944  | -0.014680 |
| 6                | 1                | 0              | 0.229369                | 0.644492  | -1.334723 |
| 7                | 7                | 0              | -0.570449               | -0.105134 | 0.485687  |
| 8                | 7                | 0              | -1.738922               | -0.135729 | 0.080374  |
| 9                | 7                | 0              | -2.853166               | -0.252784 | -0.199486 |
| 10               | 7                | 0              | 2.086439                | -0.863388 | -0.263724 |
| 11               | 1                | 0              | 3.041435                | -1.090340 | -0.007797 |
| 12               | 1                | 0              | 1.482193                | -1.529147 | 0.208267  |

-----  
**gga**, E = -298.1437475 a.u.  
 -----

| Center<br>Number | Atomic<br>Number | Atomic<br>Type | Coordinates (Angstroms) |           |           |
|------------------|------------------|----------------|-------------------------|-----------|-----------|
|                  |                  |                | X                       | Y         | Z         |
| 1                | 6                | 0              | 1.316782                | -0.042311 | 0.676249  |
| 2                | 1                | 0              | 0.707286                | -0.691260 | 1.315405  |
| 3                | 1                | 0              | 2.077648                | 0.410437  | 1.321052  |
| 4                | 6                | 0              | 0.435868                | 1.073254  | 0.114974  |
| 5                | 1                | 0              | 0.013513                | 1.680797  | 0.926397  |
| 6                | 1                | 0              | 1.014491                | 1.723974  | -0.543289 |
| 7                | 7                | 0              | -0.650764               | 0.535802  | -0.736703 |
| 8                | 7                | 0              | -1.526808               | -0.087607 | -0.121040 |
| 9                | 7                | 0              | -2.412751               | -0.679856 | 0.326056  |

|    |   |   |          |           |           |
|----|---|---|----------|-----------|-----------|
| 10 | 7 | 0 | 1.982548 | -0.873328 | -0.316288 |
| 11 | 1 | 0 | 1.300072 | -1.258782 | -0.961382 |
| 12 | 1 | 0 | 2.625514 | -0.315899 | -0.869690 |

-----  
**ggg**, E = -298.1443563 a.u.

| Center<br>Number | Atomic<br>Number | Atomic<br>Type | Coordinates (Angstroms) |           |           |
|------------------|------------------|----------------|-------------------------|-----------|-----------|
|                  |                  |                | X                       | Y         | Z         |
| 1                | 6                | 0              | 1.310068                | -0.031264 | 0.670083  |
| 2                | 1                | 0              | 0.688987                | -0.687503 | 1.301140  |
| 3                | 1                | 0              | 2.069537                | 0.420035  | 1.316871  |
| 4                | 6                | 0              | 0.436238                | 1.081087  | 0.115673  |
| 5                | 1                | 0              | 0.015248                | 1.686297  | 0.927361  |
| 6                | 1                | 0              | 1.022500                | 1.718555  | -0.545911 |
| 7                | 7                | 0              | -0.655799               | 0.541349  | -0.731583 |
| 8                | 7                | 0              | -1.518313               | -0.097432 | -0.113026 |
| 9                | 7                | 0              | -2.391740               | -0.705804 | 0.337542  |
| 10               | 7                | 0              | 1.980554                | -0.716402 | -0.429387 |
| 11               | 1                | 0              | 2.531487                | -1.495718 | -0.085905 |
| 12               | 1                | 0              | 1.291486                | -1.092581 | -1.072913 |

-----  
**ggg**<sup>-</sup>, E = -298.1417039 a.u.

| Center<br>Number | Atomic<br>Number | Atomic<br>Type | Coordinates (Angstroms) |           |           |
|------------------|------------------|----------------|-------------------------|-----------|-----------|
|                  |                  |                | X                       | Y         | Z         |
| 1                | 6                | 0              | 1.288352                | -0.052366 | 0.620635  |
| 2                | 1                | 0              | 0.695693                | -0.570123 | 1.382517  |
| 3                | 1                | 0              | 2.197425                | 0.321454  | 1.117094  |
| 4                | 6                | 0              | 0.517976                | 1.164685  | 0.126331  |
| 5                | 1                | 0              | 0.292491                | 1.821384  | 0.976045  |
| 6                | 1                | 0              | 1.115590                | 1.733972  | -0.589104 |
| 7                | 7                | 0              | -0.725746               | 0.833384  | -0.596109 |
| 8                | 7                | 0              | -1.412767               | -0.056343 | -0.081346 |
| 9                | 7                | 0              | -2.141541               | -0.874490 | 0.284325  |
| 10               | 7                | 0              | 1.528245                | -0.989400 | -0.470182 |
| 11               | 1                | 0              | 2.103109                | -0.561957 | -1.189128 |
| 12               | 1                | 0              | 2.020379                | -1.810700 | -0.136036 |

-----  
**g<sup>-</sup>ga**, E = -298.1432959 a.u.

| Center<br>Number | Atomic<br>Number | Atomic<br>Type | Coordinates (Angstroms) |           |           |
|------------------|------------------|----------------|-------------------------|-----------|-----------|
|                  |                  |                | X                       | Y         | Z         |
| 1                | 6                | 0              | 1.668685                | -0.108686 | -0.131111 |
| 2                | 1                | 0              | 1.882664                | -0.338759 | -1.178489 |
| 3                | 1                | 0              | 2.579260                | -0.318098 | 0.442047  |
| 4                | 6                | 0              | 0.578649                | -1.060192 | 0.363969  |
| 5                | 1                | 0              | 0.902277                | -2.096758 | 0.245986  |
| 6                | 1                | 0              | 0.367618                | -0.880283 | 1.426541  |
| 7                | 7                | 0              | -0.665143               | -0.939199 | -0.425770 |
| 8                | 7                | 0              | -1.436707               | -0.037460 | -0.073939 |
| 9                | 7                | 0              | -2.263104               | 0.734844  | 0.164831  |
| 10               | 7                | 0              | 1.372570                | 1.311586  | -0.033442 |

|    |   |   |          |          |           |
|----|---|---|----------|----------|-----------|
| 11 | 1 | 0 | 0.626317 | 1.581725 | -0.663130 |
| 12 | 1 | 0 | 1.104545 | 1.577043 | 0.908133  |

-----  
***g<sup>-</sup>gg***, E = -298.1440396 a.u.  
 -----

| Center<br>Number | Atomic<br>Number | Atomic<br>Type | Coordinates (Angstroms) |           |           |
|------------------|------------------|----------------|-------------------------|-----------|-----------|
|                  |                  |                | X                       | Y         | Z         |
| 1                | 6                | 0              | 1.681067                | -0.127767 | -0.094023 |
| 2                | 1                | 0              | 1.974632                | -0.384178 | -1.121217 |
| 3                | 1                | 0              | 2.545670                | -0.299417 | 0.555485  |
| 4                | 6                | 0              | 0.570136                | -1.067977 | 0.348179  |
| 5                | 1                | 0              | 0.868907                | -2.108126 | 0.202806  |
| 6                | 1                | 0              | 0.341538                | -0.901221 | 1.406587  |
| 7                | 7                | 0              | -0.643958               | -0.880973 | -0.475641 |
| 8                | 7                | 0              | -1.443075               | -0.026087 | -0.068145 |
| 9                | 7                | 0              | -2.288786               | 0.713029  | 0.200314  |
| 10               | 7                | 0              | 1.242076                | 1.257128  | 0.067070  |
| 11               | 1                | 0              | 2.035665                | 1.887439  | 0.083227  |
| 12               | 1                | 0              | 0.662574                | 1.538293  | -0.717007 |

-----  
***g<sup>-</sup>gg<sup>-</sup>***, E = -298.1441097 a.u.  
 -----

| Center<br>Number | Atomic<br>Number | Atomic<br>Type | Coordinates (Angstroms) |           |           |
|------------------|------------------|----------------|-------------------------|-----------|-----------|
|                  |                  |                | X                       | Y         | Z         |
| 1                | 6                | 0              | 1.607005                | -0.099465 | -0.228892 |
| 2                | 1                | 0              | 1.631050                | -0.240582 | -1.312631 |
| 3                | 1                | 0              | 2.603919                | -0.347945 | 0.166940  |
| 4                | 6                | 0              | 0.600827                | -1.080849 | 0.355571  |
| 5                | 1                | 0              | 0.948086                | -2.105591 | 0.212412  |
| 6                | 1                | 0              | 0.486043                | -0.906508 | 1.434522  |
| 7                | 7                | 0              | -0.705577               | -1.014881 | -0.317007 |
| 8                | 7                | 0              | -1.407075               | -0.023906 | -0.064522 |
| 9                | 7                | 0              | -2.196765               | 0.804142  | 0.087294  |
| 10               | 7                | 0              | 1.174327                | 1.267370  | 0.047448  |
| 11               | 1                | 0              | 1.371776                | 1.520258  | 1.010257  |
| 12               | 1                | 0              | 1.657772                | 1.933169  | -0.544067 |

## 2-Azidoethylammonium ion

***aa***, E = -298.4896945 a.u.  
 -----

| Center<br>Number | Atomic<br>Number | Atomic<br>Type | Coordinates (Angstroms) |           |           |
|------------------|------------------|----------------|-------------------------|-----------|-----------|
|                  |                  |                | X                       | Y         | Z         |
| 1                | 6                | 0              | 1.461809                | 0.531699  | -0.052287 |
| 2                | 1                | 0              | 1.499362                | 1.225841  | 0.787701  |
| 3                | 1                | 0              | 1.474295                | 1.088431  | -0.989291 |
| 4                | 6                | 0              | 0.237243                | -0.365491 | 0.041136  |
| 5                | 1                | 0              | 0.187007                | -1.033839 | -0.830079 |
| 6                | 1                | 0              | 0.280279                | -0.976441 | 0.954638  |
| 7                | 7                | 0              | -0.875805               | 0.579286  | 0.074558  |
| 8                | 7                | 0              | -2.002694               | 0.045682  | 0.002219  |

|    |   |   |           |           |           |
|----|---|---|-----------|-----------|-----------|
| 9  | 7 | 0 | -3.095822 | -0.303905 | -0.052915 |
| 10 | 7 | 0 | 2.724460  | -0.293663 | -0.005821 |
| 11 | 1 | 0 | 2.793411  | -0.823332 | 0.868639  |
| 12 | 1 | 0 | 2.761567  | -0.966994 | -0.777329 |
| 13 | 1 | 0 | 3.558788  | 0.297283  | -0.073664 |

*ag*, E = -298.4877987 a.u.

| Center<br>Number | Atomic<br>Number | Atomic<br>Type | Coordinates (Angstroms) |           |           |
|------------------|------------------|----------------|-------------------------|-----------|-----------|
|                  |                  |                | X                       | Y         | Z         |
| 1                | 6                | 0              | 1.184091                | -0.291489 | -0.428125 |
| 2                | 1                | 0              | 1.283001                | 0.015045  | -1.469905 |
| 3                | 1                | 0              | 0.800775                | -1.312039 | -0.381331 |
| 4                | 6                | 0              | 0.296646                | 0.689036  | 0.337482  |
| 5                | 1                | 0              | 0.175429                | 0.374861  | 1.382912  |
| 6                | 1                | 0              | 0.741210                | 1.688312  | 0.325161  |
| 7                | 7                | 0              | -0.979494               | 0.804424  | -0.361990 |
| 8                | 7                | 0              | -1.830779               | -0.046814 | -0.022849 |
| 9                | 7                | 0              | -2.719293               | -0.744139 | 0.193375  |
| 10               | 7                | 0              | 2.578694                | -0.322911 | 0.159263  |
| 11               | 1                | 0              | 3.014543                | 0.604102  | 0.125301  |
| 12               | 1                | 0              | 2.567668                | -0.621490 | 1.139461  |
| 13               | 1                | 0              | 3.189057                | -0.967988 | -0.352334 |

*ga*, E = -298.5033931 a.u.

| Center<br>Number | Atomic<br>Number | Atomic<br>Type | Coordinates (Angstroms) |           |           |
|------------------|------------------|----------------|-------------------------|-----------|-----------|
|                  |                  |                | X                       | Y         | Z         |
| 1                | 6                | 0              | -1.662546               | 0.601286  | -0.266265 |
| 2                | 1                | 0              | -1.684610               | 0.637392  | -1.355631 |
| 3                | 1                | 0              | -2.410269               | 1.277646  | 0.148445  |
| 4                | 6                | 0              | -0.263232               | 0.880439  | 0.257179  |
| 5                | 1                | 0              | 0.096499                | 1.812030  | -0.191970 |
| 6                | 1                | 0              | -0.263870               | 0.992453  | 1.349087  |
| 7                | 7                | 0              | 0.520843                | -0.292158 | -0.160424 |
| 8                | 7                | 0              | 1.758967                | -0.173709 | -0.045783 |
| 9                | 7                | 0              | 2.904896                | -0.177314 | 0.013338  |
| 10               | 7                | 0              | -2.028278               | -0.808145 | 0.117584  |
| 11               | 1                | 0              | -1.230607               | -1.411712 | -0.138571 |
| 12               | 1                | 0              | -2.174034               | -0.902895 | 1.126721  |
| 13               | 1                | 0              | -2.873438               | -1.135987 | -0.356561 |

## 2-Azidoethanol

*aaa*, E = -317.9936287 a.u.

| Center<br>Number | Atomic<br>Number | Atomic<br>Type | Coordinates (Angstroms) |          |           |
|------------------|------------------|----------------|-------------------------|----------|-----------|
|                  |                  |                | X                       | Y        | Z         |
| 1                | 6                | 0              | -1.583141               | 0.475521 | -0.084728 |
| 2                | 1                | 0              | -1.534298               | 0.984153 | -1.054246 |
| 3                | 1                | 0              | -1.637358               | 1.231104 | 0.707517  |

|    |   |   |           |           |           |
|----|---|---|-----------|-----------|-----------|
| 4  | 6 | 0 | -0.332424 | -0.355839 | 0.112297  |
| 5  | 1 | 0 | -0.397712 | -0.899388 | 1.060953  |
| 6  | 1 | 0 | -0.234440 | -1.077152 | -0.706466 |
| 7  | 7 | 0 | 0.807909  | 0.582533  | 0.131462  |
| 8  | 7 | 0 | 1.921124  | 0.060009  | -0.002456 |
| 9  | 7 | 0 | 3.012890  | -0.299114 | -0.111987 |
| 10 | 1 | 0 | -3.484966 | 0.080731  | -0.105723 |
| 11 | 8 | 0 | -2.676413 | -0.430192 | -0.023323 |

-----  
**aag**, E = -317.9931043 a.u.  
 -----

| Center<br>Number | Atomic<br>Number | Atomic<br>Type | Coordinates (Angstroms) |           |           |
|------------------|------------------|----------------|-------------------------|-----------|-----------|
|                  |                  |                | X                       | Y         | Z         |
| 1                | 6                | 0              | -1.591839               | 0.489064  | -0.066091 |
| 2                | 1                | 0              | -1.558875               | 1.046658  | -1.002686 |
| 3                | 1                | 0              | -1.642427               | 1.206877  | 0.760766  |
| 4                | 6                | 0              | -0.333193               | -0.352850 | 0.071738  |
| 5                | 1                | 0              | -0.381802               | -0.960313 | 0.985220  |
| 6                | 1                | 0              | -0.244027               | -1.022601 | -0.790800 |
| 7                | 7                | 0              | 0.810086                | 0.578567  | 0.145862  |
| 8                | 7                | 0              | 1.922547                | 0.054860  | 0.005299  |
| 9                | 7                | 0              | 3.013663                | -0.305314 | -0.106790 |
| 10               | 1                | 0              | -2.858274               | -0.746538 | 0.730287  |
| 11               | 8                | 0              | -2.748559               | -0.329770 | -0.128409 |

-----  
**gaa**, E = -317.9937883 a.u.  
 -----

| Center<br>Number | Atomic<br>Number | Atomic<br>Type | Coordinates (Angstroms) |           |           |
|------------------|------------------|----------------|-------------------------|-----------|-----------|
|                  |                  |                | X                       | Y         | Z         |
| 1                | 6                | 0              | -1.217348               | -0.344669 | 0.363449  |
| 2                | 1                | 0              | -1.282010               | -0.169871 | 1.443584  |
| 3                | 1                | 0              | -0.706471               | -1.301653 | 0.192777  |
| 4                | 6                | 0              | -0.419856               | 0.782062  | -0.271693 |
| 5                | 1                | 0              | -0.362122               | 0.634856  | -1.355968 |
| 6                | 1                | 0              | -0.902710               | 1.738060  | -0.072735 |
| 7                | 7                | 0              | 0.928822                | 0.876774  | 0.320873  |
| 8                | 7                | 0              | 1.701003                | -0.043728 | 0.017572  |
| 9                | 7                | 0              | 2.528421                | -0.823434 | -0.187331 |
| 10               | 1                | 0              | -3.053011               | -0.963340 | 0.206036  |
| 11               | 8                | 0              | -2.497271               | -0.328712 | -0.252754 |

-----  
**gag**, E = -317.9932137 a.u.  
 -----

| Center<br>Number | Atomic<br>Number | Atomic<br>Type | Coordinates (Angstroms) |           |           |
|------------------|------------------|----------------|-------------------------|-----------|-----------|
|                  |                  |                | X                       | Y         | Z         |
| 1                | 6                | 0              | -1.219109               | -0.334477 | 0.389783  |
| 2                | 1                | 0              | -1.285520               | -0.128940 | 1.458999  |
| 3                | 1                | 0              | -0.706009               | -1.296206 | 0.256999  |
| 4                | 6                | 0              | -0.423865               | 0.776883  | -0.287973 |
| 5                | 1                | 0              | -0.369048               | 0.604363  | -1.371501 |
| 6                | 1                | 0              | -0.909747               | 1.736830  | -0.115863 |
| 7                | 7                | 0              | 0.931860                | 0.896495  | 0.281896  |

|    |   |   |           |           |           |
|----|---|---|-----------|-----------|-----------|
| 8  | 7 | 0 | 1.698001  | -0.040409 | 0.014394  |
| 9  | 7 | 0 | 2.521602  | -0.830580 | -0.164625 |
| 10 | 1 | 0 | -2.518406 | -0.655385 | -1.015308 |
| 11 | 8 | 0 | -2.551707 | -0.386705 | -0.093231 |

-----  
*gag*<sup>-</sup>, E = -317.993299 a.u.  
 -----

| Center<br>Number | Atomic<br>Number | Atomic<br>Type | Coordinates (Angstroms) |           |           |
|------------------|------------------|----------------|-------------------------|-----------|-----------|
|                  |                  |                | X                       | Y         | Z         |
| 1                | 6                | 0              | -1.211726               | -0.369907 | 0.355741  |
| 2                | 1                | 0              | -1.246155               | -0.220396 | 1.441236  |
| 3                | 1                | 0              | -0.715722               | -1.323131 | 0.158482  |
| 4                | 6                | 0              | -0.424351               | 0.767676  | -0.286831 |
| 5                | 1                | 0              | -0.370011               | 0.616126  | -1.370894 |
| 6                | 1                | 0              | -0.912025               | 1.725529  | -0.095980 |
| 7                | 7                | 0              | 0.923362                | 0.891050  | 0.301911  |
| 8                | 7                | 0              | 1.703020                | -0.030304 | 0.018879  |
| 9                | 7                | 0              | 2.536649                | -0.807292 | -0.169540 |
| 10               | 1                | 0              | -3.004953               | 0.300962  | 0.046828  |
| 11               | 8                | 0              | -2.509487               | -0.482485 | -0.206486 |

-----  
*agg*, E = -317.9921166 a.u.  
 -----

| Center<br>Number | Atomic<br>Number | Atomic<br>Type | Coordinates (Angstroms) |           |           |
|------------------|------------------|----------------|-------------------------|-----------|-----------|
|                  |                  |                | X                       | Y         | Z         |
| 1                | 6                | 0              | -1.756580               | 0.442143  | -0.140913 |
| 2                | 1                | 0              | -1.839055               | 0.643634  | -1.210263 |
| 3                | 1                | 0              | -2.443514               | 1.112470  | 0.393312  |
| 4                | 6                | 0              | -0.343570               | 0.748212  | 0.317465  |
| 5                | 1                | 0              | -0.165874               | 1.829629  | 0.251924  |
| 6                | 1                | 0              | -0.213712               | 0.441374  | 1.364717  |
| 7                | 7                | 0              | 0.601122                | 0.025823  | -0.552682 |
| 8                | 7                | 0              | 1.742228                | -0.110362 | -0.095528 |
| 9                | 7                | 0              | 2.838174                | -0.305520 | 0.211414  |
| 10               | 1                | 0              | -2.048051               | -1.120474 | 0.965227  |
| 11               | 8                | 0              | -2.119945               | -0.914793 | 0.029169  |

-----  
*agg*<sup>-</sup>, E = -317.9975925 a.u.  
 -----

| Center<br>Number | Atomic<br>Number | Atomic<br>Type | Coordinates (Angstroms) |           |           |
|------------------|------------------|----------------|-------------------------|-----------|-----------|
|                  |                  |                | X                       | Y         | Z         |
| 1                | 6                | 0              | 1.769865                | 0.432869  | 0.162376  |
| 2                | 1                | 0              | 1.877186                | 0.565816  | 1.246226  |
| 3                | 1                | 0              | 2.481718                | 1.089393  | -0.342360 |
| 4                | 6                | 0              | 0.361145                | 0.812312  | -0.247646 |
| 5                | 1                | 0              | 0.151734                | 1.857083  | 0.011957  |
| 6                | 1                | 0              | 0.241168                | 0.667594  | -1.327172 |
| 7                | 7                | 0              | -0.549747               | -0.090944 | 0.493424  |
| 8                | 7                | 0              | -1.716056               | -0.120341 | 0.079270  |
| 9                | 7                | 0              | -2.829291               | -0.229829 | -0.204898 |
| 10               | 1                | 0              | 1.421680                | -1.454368 | 0.175797  |
| 11               | 8                | 0              | 2.088263                | -0.888601 | -0.228425 |

-----  
**gga**, E=-317.9931951 a.u.  
-----

| Center<br>Number | Atomic<br>Number | Atomic<br>Type | Coordinates (Angstroms) |           |           |
|------------------|------------------|----------------|-------------------------|-----------|-----------|
|                  |                  |                | X                       | Y         | Z         |
| 1                | 6                | 0              | 1.287412                | -0.128280 | 0.624199  |
| 2                | 1                | 0              | 0.642741                | -0.831485 | 1.168823  |
| 3                | 1                | 0              | 2.071821                | 0.217366  | 1.311107  |
| 4                | 6                | 0              | 0.474800                | 1.074197  | 0.187887  |
| 5                | 1                | 0              | 0.152677                | 1.636642  | 1.073748  |
| 6                | 1                | 0              | 1.086664                | 1.723372  | -0.438509 |
| 7                | 7                | 0              | -0.694028               | 0.718517  | -0.640479 |
| 8                | 7                | 0              | -1.488658               | -0.066018 | -0.108883 |
| 9                | 7                | 0              | -2.304063               | -0.796174 | 0.262457  |
| 10               | 1                | 0              | 2.145573                | -1.605854 | -0.298796 |
| 11               | 8                | 0              | 1.841812                | -0.726227 | -0.535070 |

-----  
**ggg**, E = -317.9933057 a.u.  
-----

| Center<br>Number | Atomic<br>Number | Atomic<br>Type | Coordinates (Angstroms) |           |           |
|------------------|------------------|----------------|-------------------------|-----------|-----------|
|                  |                  |                | X                       | Y         | Z         |
| 1                | 6                | 0              | 1.306798                | -0.119325 | 0.623375  |
| 2                | 1                | 0              | 0.701612                | -0.729714 | 1.298868  |
| 3                | 1                | 0              | 2.183525                | 0.233778  | 1.183791  |
| 4                | 6                | 0              | 0.514893                | 1.097828  | 0.167006  |
| 5                | 1                | 0              | 0.231645                | 1.693078  | 1.045643  |
| 6                | 1                | 0              | 1.121324                | 1.728696  | -0.486683 |
| 7                | 7                | 0              | -0.676229               | 0.757907  | -0.632311 |
| 8                | 7                | 0              | -1.451894               | -0.046205 | -0.098718 |
| 9                | 7                | 0              | -2.256076               | -0.785119 | 0.277083  |
| 10               | 1                | 0              | 2.141145                | -0.454159 | -1.094366 |
| 11               | 8                | 0              | 1.672500                | -0.978598 | -0.438990 |

-----  
**ggg<sup>-</sup>**, E = -317.9966316 a.u.  
-----

| Center<br>Number | Atomic<br>Number | Atomic<br>Type | Coordinates (Angstroms) |           |           |
|------------------|------------------|----------------|-------------------------|-----------|-----------|
|                  |                  |                | X                       | Y         | Z         |
| 1                | 6                | 0              | 1.343019                | -0.068464 | 0.659246  |
| 2                | 1                | 0              | 0.740559                | -0.734737 | 1.293251  |
| 3                | 1                | 0              | 2.136631                | 0.360840  | 1.275624  |
| 4                | 6                | 0              | 0.466104                | 1.045594  | 0.113269  |
| 5                | 1                | 0              | 0.044279                | 1.646081  | 0.928634  |
| 6                | 1                | 0              | 1.048720                | 1.688919  | -0.546040 |
| 7                | 7                | 0              | -0.615200               | 0.492960  | -0.738676 |
| 8                | 7                | 0              | -1.518883               | -0.081719 | -0.112812 |
| 9                | 7                | 0              | -2.430652               | -0.623832 | 0.344383  |
| 10               | 1                | 0              | 1.290027                | -1.043147 | -1.000717 |
| 11               | 8                | 0              | 1.979773                | -0.786574 | -0.379513 |

-----  
**g<sup>-</sup>ga**, E = -317.9964716 a.u.  
-----

| Center<br>Number | Atomic<br>Number | Atomic<br>Type | Coordinates (Angstroms) |           |           |
|------------------|------------------|----------------|-------------------------|-----------|-----------|
|                  |                  |                | X                       | Y         | Z         |
| 1                | 6                | 0              | 1.603310                | -0.012971 | -0.214404 |
| 2                | 1                | 0              | 1.660519                | -0.128211 | -1.302867 |
| 3                | 1                | 0              | 2.600749                | -0.166688 | 0.218607  |
| 4                | 6                | 0              | 0.654399                | -1.052728 | 0.343741  |
| 5                | 1                | 0              | 1.055431                | -2.052416 | 0.170072  |
| 6                | 1                | 0              | 0.540027                | -0.900639 | 1.423917  |
| 7                | 7                | 0              | -0.653950               | -1.028735 | -0.329130 |
| 8                | 7                | 0              | -1.382357               | -0.060239 | -0.062333 |
| 9                | 7                | 0              | -2.184877               | 0.753885  | 0.094136  |
| 10               | 1                | 0              | 1.545349                | 1.931109  | -0.352833 |
| 11               | 8                | 0              | 1.074994                | 1.257083  | 0.143546  |

*g<sup>-</sup>gg*, E = -317.9950677 a.u.

| Center<br>Number | Atomic<br>Number | Atomic<br>Type | Coordinates (Angstroms) |           |           |
|------------------|------------------|----------------|-------------------------|-----------|-----------|
|                  |                  |                | X                       | Y         | Z         |
| 1                | 6                | 0              | 1.595566                | -0.011512 | -0.236458 |
| 2                | 1                | 0              | 1.639990                | -0.144662 | -1.318606 |
| 3                | 1                | 0              | 2.602397                | -0.156220 | 0.177793  |
| 4                | 6                | 0              | 0.653947                | -1.047360 | 0.356878  |
| 5                | 1                | 0              | 1.056517                | -2.050164 | 0.200122  |
| 6                | 1                | 0              | 0.544426                | -0.887453 | 1.438994  |
| 7                | 7                | 0              | -0.662356               | -1.042904 | -0.298265 |
| 8                | 7                | 0              | -1.383154               | -0.062059 | -0.059654 |
| 9                | 7                | 0              | -2.180507               | 0.760231  | 0.083570  |
| 10               | 1                | 0              | 1.231552                | 1.515392  | 0.907390  |
| 11               | 8                | 0              | 1.126270                | 1.311183  | -0.025972 |

*g<sup>-</sup>gg<sup>-</sup>*, E = -317.9953487 a.u.

| Center<br>Number | Atomic<br>Number | Atomic<br>Type | Coordinates (Angstroms) |           |           |
|------------------|------------------|----------------|-------------------------|-----------|-----------|
|                  |                  |                | X                       | Y         | Z         |
| 1                | 6                | 0              | 1.658495                | -0.039146 | -0.126116 |
| 2                | 1                | 0              | 1.883447                | -0.219364 | -1.183061 |
| 3                | 1                | 0              | 2.576002                | -0.177599 | 0.452882  |
| 4                | 6                | 0              | 0.620170                | -1.043535 | 0.348649  |
| 5                | 1                | 0              | 0.986853                | -2.060629 | 0.194518  |
| 6                | 1                | 0              | 0.418641                | -0.894523 | 1.415552  |
| 7                | 7                | 0              | -0.627624               | -0.940761 | -0.433976 |
| 8                | 7                | 0              | -1.414838               | -0.055787 | -0.066763 |
| 9                | 7                | 0              | -2.256375               | 0.697355  | 0.174863  |
| 10               | 1                | 0              | 0.710548                | 1.568853  | -0.668226 |
| 11               | 8                | 0              | 1.230547                | 1.296712  | 0.091784  |

### Protonated 2-azidoethanol

*aaa*, E = -318.2854237 a.u.

| Center<br>Number | Atomic<br>Number | Atomic<br>Type | Coordinates (Angstroms) |   |   |
|------------------|------------------|----------------|-------------------------|---|---|
|                  |                  |                | X                       | Y | Z |



| Number | Number | Type | X         | Y         | Z         |
|--------|--------|------|-----------|-----------|-----------|
| 1      | 6      | 0    | 1.423838  | 0.526903  | -0.142003 |
| 2      | 1      | 0    | 1.521015  | 1.317156  | 0.599738  |
| 3      | 1      | 0    | 1.436714  | 0.934539  | -1.150041 |
| 4      | 6      | 0    | 0.253341  | -0.396225 | 0.133148  |
| 5      | 1      | 0    | 0.142561  | -1.131046 | -0.674622 |
| 6      | 1      | 0    | 0.388995  | -0.923784 | 1.087349  |
| 7      | 7      | 0    | -0.856293 | 0.552480  | 0.191445  |
| 8      | 7      | 0    | -1.982417 | 0.043305  | 0.005029  |
| 9      | 7      | 0    | -3.073067 | -0.283900 | -0.141905 |
| 10     | 1      | 0    | 2.970879  | -0.529699 | 0.849410  |
| 11     | 1      | 0    | 2.856584  | -0.940345 | -0.682639 |
| 12     | 8      | 0    | 2.750328  | -0.211761 | -0.044756 |

*aag*, E = -318.2862642 a.u.

| Center Number | Atomic Number | Atomic Type | Coordinates (Angstroms) |           |           |
|---------------|---------------|-------------|-------------------------|-----------|-----------|
|               |               |             | X                       | Y         | Z         |
| 1             | 6             | 0           | 1.419317                | 0.529149  | -0.101208 |
| 2             | 1             | 0           | 1.508755                | 1.252642  | 0.707841  |
| 3             | 1             | 0           | 1.433467                | 1.002307  | -1.080193 |
| 4             | 6             | 0           | 0.250283                | -0.414779 | 0.085707  |
| 5             | 1             | 0           | 0.135378                | -1.055745 | -0.795060 |
| 6             | 1             | 0           | 0.394743                | -1.043330 | 0.975904  |
| 7             | 7             | 0           | -0.855421               | 0.524594  | 0.266602  |
| 8             | 7             | 0           | -1.982364               | 0.048631  | 0.011161  |
| 9             | 7             | 0           | -3.073177               | -0.253250 | -0.181434 |
| 10            | 1             | 0           | 3.490426                | 0.174012  | -0.371408 |
| 11            | 1             | 0           | 2.864401                | -0.758832 | 0.752431  |
| 12            | 8             | 0           | 2.691495                | -0.312137 | -0.096351 |

*aga*, E = -318.3045322 a.u.

| Center Number | Atomic Number | Atomic Type | Coordinates (Angstroms) |           |           |
|---------------|---------------|-------------|-------------------------|-----------|-----------|
|               |               |             | X                       | Y         | Z         |
| 1             | 6             | 0           | -1.766490               | 0.518932  | -0.154884 |
| 2             | 1             | 0           | -1.995110               | 0.635982  | -1.211384 |
| 3             | 1             | 0           | -2.544458               | 0.950194  | 0.471400  |
| 4             | 6             | 0           | -0.348896               | 0.967287  | 0.196600  |
| 5             | 1             | 0           | -0.115800               | 1.893998  | -0.334947 |
| 6             | 1             | 0           | -0.227329               | 1.116073  | 1.275005  |
| 7             | 7             | 0           | 0.454884                | -0.177173 | -0.279497 |
| 8             | 7             | 0           | 1.685024                | -0.134181 | -0.047979 |
| 9             | 7             | 0           | 2.820731                | -0.173520 | 0.090156  |
| 10            | 1             | 0           | -0.776890               | -1.180551 | -0.066402 |
| 11            | 1             | 0           | -2.103070               | -1.240825 | 0.920403  |
| 12            | 8             | 0           | -1.783687               | -0.962259 | 0.044609  |

*agg*, E = -318.3065567 a.u.

| Center Number | Atomic Number | Atomic Type | Coordinates (Angstroms) |   |   |
|---------------|---------------|-------------|-------------------------|---|---|
|               |               |             | X                       | Y | Z |

|    |   |   |           |           |           |
|----|---|---|-----------|-----------|-----------|
| 1  | 6 | 0 | 1.776665  | 0.504632  | 0.125923  |
| 2  | 1 | 0 | 2.030318  | 0.575684  | 1.183114  |
| 3  | 1 | 0 | 2.529471  | 0.958480  | -0.513465 |
| 4  | 6 | 0 | 0.356125  | 0.977481  | -0.163702 |
| 5  | 1 | 0 | 0.158984  | 1.909900  | 0.371160  |
| 6  | 1 | 0 | 0.203462  | 1.118477  | -1.238349 |
| 7  | 7 | 0 | -0.453288 | -0.151694 | 0.349103  |
| 8  | 7 | 0 | -1.673780 | -0.130041 | 0.059073  |
| 9  | 7 | 0 | -2.802178 | -0.186789 | -0.124278 |
| 10 | 1 | 0 | 2.350774  | -1.499908 | 0.249493  |
| 11 | 1 | 0 | 0.720590  | -1.144436 | 0.020174  |
| 12 | 8 | 0 | 1.714298  | -0.941401 | -0.229092 |

### *N*-(2-Azidoethyl)ethanamide

*aag*, E = -450.5017572 a.u.

| Center Number | Atomic Number | Atomic Type | Coordinates (Angstroms) |           |           |
|---------------|---------------|-------------|-------------------------|-----------|-----------|
|               |               |             | X                       | Y         | Z         |
| 1             | 6             | 0           | 0.140306                | 1.008770  | -0.485202 |
| 2             | 1             | 0           | -0.121590               | 2.069036  | -0.508826 |
| 3             | 1             | 0           | 0.159020                | 0.628685  | -1.509413 |
| 4             | 6             | 0           | -0.902211               | 0.238215  | 0.313639  |
| 5             | 1             | 0           | -0.669848               | -0.830709 | 0.277342  |
| 6             | 1             | 0           | -0.900436               | 0.577021  | 1.356989  |
| 7             | 7             | 0           | -2.212325               | 0.517999  | -0.310881 |
| 8             | 7             | 0           | -3.140974               | -0.202911 | 0.076123  |
| 9             | 7             | 0           | -4.089321               | -0.800226 | 0.353513  |
| 10            | 7             | 0           | 1.460870                | 0.868600  | 0.095166  |
| 11            | 1             | 0           | 1.850498                | 1.622115  | 0.638176  |
| 12            | 6             | 0           | 2.183407                | -0.281792 | -0.074035 |
| 13            | 6             | 0           | 3.561142                | -0.290116 | 0.551668  |
| 14            | 1             | 0           | 3.764021                | 0.592293  | 1.162120  |
| 15            | 1             | 0           | 3.658822                | -1.186818 | 1.165773  |
| 16            | 1             | 0           | 4.302149                | -0.349670 | -0.248544 |
| 17            | 8             | 0           | 1.741719                | -1.232081 | -0.708436 |

*gag*, E = -450.5023757 a.u.

| Center Number | Atomic Number | Atomic Type | Coordinates (Angstroms) |           |           |
|---------------|---------------|-------------|-------------------------|-----------|-----------|
|               |               |             | X                       | Y         | Z         |
| 1             | 6             | 0           | 0.097848                | -0.763771 | -0.659378 |
| 2             | 1             | 0           | 0.374848                | -1.615305 | -1.285193 |
| 3             | 1             | 0           | 0.345023                | 0.158120  | -1.194649 |
| 4             | 6             | 0           | 0.874035                | -0.813017 | 0.657019  |
| 5             | 1             | 0           | 0.571788                | 0.024334  | 1.294118  |
| 6             | 1             | 0           | 0.674541                | -1.749896 | 1.178785  |
| 7             | 7             | 0           | 2.330039                | -0.794856 | 0.415925  |
| 8             | 7             | 0           | 2.777854                | 0.290865  | 0.016428  |
| 9             | 7             | 0           | 3.335365                | 1.234627  | -0.347167 |
| 10            | 7             | 0           | -1.333437               | -0.792200 | -0.434644 |

|    |   |   |           |           |           |
|----|---|---|-----------|-----------|-----------|
| 11 | 1 | 0 | -1.844353 | -1.650579 | -0.564253 |
| 12 | 6 | 0 | -1.994451 | 0.331354  | -0.015054 |
| 13 | 6 | 0 | -3.488329 | 0.184594  | 0.172501  |
| 14 | 1 | 0 | -3.842505 | -0.839154 | 0.035064  |
| 15 | 1 | 0 | -3.748043 | 0.526693  | 1.175733  |
| 16 | 1 | 0 | -3.991215 | 0.837135  | -0.544483 |
| 17 | 8 | 0 | -1.405431 | 1.388080  | 0.177569  |

-----  
*gag*<sup>-</sup>, E = -450.5016516 a.u.  
 -----

| Center<br>Number | Atomic<br>Number | Atomic<br>Type | Coordinates (Angstroms) |           |           |
|------------------|------------------|----------------|-------------------------|-----------|-----------|
|                  |                  |                | X                       | Y         | Z         |
| 1                | 6                | 0              | -0.168400               | -0.359972 | -0.512458 |
| 2                | 1                | 0              | -0.078189               | 0.265187  | -1.404149 |
| 3                | 1                | 0              | -0.763451               | -1.242890 | -0.763803 |
| 4                | 6                | 0              | -0.851390               | 0.446977  | 0.592306  |
| 5                | 1                | 0              | -0.919973               | -0.149891 | 1.510596  |
| 6                | 1                | 0              | -0.276196               | 1.349148  | 0.794124  |
| 7                | 7                | 0              | -2.190947               | 0.904543  | 0.172162  |
| 8                | 7                | 0              | -3.028402               | 0.002720  | 0.031107  |
| 9                | 7                | 0              | -3.907160               | -0.730764 | -0.129659 |
| 10               | 7                | 0              | 1.151594                | -0.802553 | -0.110422 |
| 11               | 1                | 0              | 1.283998                | -1.744955 | 0.220087  |
| 12               | 6                | 0              | 2.207043                | 0.070687  | -0.092743 |
| 13               | 6                | 0              | 3.532469                | -0.511063 | 0.347916  |
| 14               | 1                | 0              | 3.459763                | -1.547256 | 0.684695  |
| 15               | 1                | 0              | 4.228518                | -0.455631 | -0.491813 |
| 16               | 1                | 0              | 3.931780                | 0.105728  | 1.154850  |
| 17               | 8                | 0              | 2.079977                | 1.240395  | -0.432128 |

-----  
*agg*<sup>-</sup>, E = -450.5051956 a.u.  
 -----

| Center<br>Number | Atomic<br>Number | Atomic<br>Type | Coordinates (Angstroms) |           |           |
|------------------|------------------|----------------|-------------------------|-----------|-----------|
|                  |                  |                | X                       | Y         | Z         |
| 1                | 6                | 0              | -0.246738               | 1.478844  | -0.430530 |
| 2                | 1                | 0              | 0.080698                | 1.990471  | -1.338754 |
| 3                | 1                | 0              | -0.808342               | 2.180806  | 0.189522  |
| 4                | 6                | 0              | 0.958689                | 0.985444  | 0.353117  |
| 5                | 1                | 0              | 1.615494                | 1.827040  | 0.605331  |
| 6                | 1                | 0              | 0.622799                | 0.497633  | 1.274360  |
| 7                | 7                | 0              | 1.669543                | 0.019907  | -0.516085 |
| 8                | 7                | 0              | 2.658949                | -0.517797 | -0.001603 |
| 9                | 7                | 0              | 3.596120                | -1.086593 | 0.361102  |
| 10               | 7                | 0              | -1.133166               | 0.396631  | -0.805701 |
| 11               | 1                | 0              | -0.869836               | -0.161695 | -1.604094 |
| 12               | 6                | 0              | -1.934074               | -0.187192 | 0.142748  |
| 13               | 6                | 0              | -2.636717               | -1.454713 | -0.290814 |
| 14               | 1                | 0              | -2.593439               | -1.618168 | -1.369435 |
| 15               | 1                | 0              | -2.170007               | -2.301585 | 0.219014  |
| 16               | 1                | 0              | -3.678098               | -1.402320 | 0.029477  |
| 17               | 8                | 0              | -2.073294               | 0.296060  | 1.260434  |

-----  
*agg*<sup>-</sup>, E = -450.5005642 a.u.  
 -----

| Center Number | Atomic Number | Atomic Type | Coordinates (Angstroms) |           |           |
|---------------|---------------|-------------|-------------------------|-----------|-----------|
|               |               |             | X                       | Y         | Z         |
| 1             | 6             | 0           | 0.257582                | 1.609736  | 0.074635  |
| 2             | 1             | 0           | 0.425893                | 1.541018  | 1.150717  |
| 3             | 1             | 0           | 0.415747                | 2.646829  | -0.239882 |
| 4             | 6             | 0           | -1.172003               | 1.207394  | -0.254245 |
| 5             | 1             | 0           | -1.870998               | 1.853593  | 0.291786  |
| 6             | 1             | 0           | -1.363115               | 1.317936  | -1.330718 |
| 7             | 7             | 0           | -1.342854               | -0.203569 | 0.141757  |
| 8             | 7             | 0           | -2.499199               | -0.633490 | 0.045286  |
| 9             | 7             | 0           | -3.529265               | -1.154127 | -0.000197 |
| 10            | 7             | 0           | 1.224254                | 0.737651  | -0.555168 |
| 11            | 1             | 0           | 1.152666                | 0.600316  | -1.553063 |
| 12            | 6             | 0           | 1.865828                | -0.247851 | 0.164852  |
| 13            | 6             | 0           | 2.573053                | -1.282702 | -0.683298 |
| 14            | 1             | 0           | 2.864177                | -0.895710 | -1.662638 |
| 15            | 1             | 0           | 3.456071                | -1.633482 | -0.149535 |
| 16            | 1             | 0           | 1.896710                | -2.130574 | -0.825602 |
| 17            | 8             | 0           | 1.863193                | -0.280581 | 1.385689  |

**ggg**, E = -450.504104 a.u.

| Center Number | Atomic Number | Atomic Type | Coordinates (Angstroms) |           |           |
|---------------|---------------|-------------|-------------------------|-----------|-----------|
|               |               |             | X                       | Y         | Z         |
| 1             | 6             | 0           | -0.139059               | 0.778928  | 0.876358  |
| 2             | 1             | 0           | -0.842819               | 0.502037  | 1.667355  |
| 3             | 1             | 0           | 0.402026                | 1.673475  | 1.194684  |
| 4             | 6             | 0           | -0.884672               | 1.090011  | -0.417766 |
| 5             | 1             | 0           | -1.561278               | 1.941335  | -0.272137 |
| 6             | 1             | 0           | -0.173163               | 1.333652  | -1.205552 |
| 7             | 7             | 0           | -1.637758               | -0.088301 | -0.905404 |
| 8             | 7             | 0           | -2.617737               | -0.399821 | -0.214793 |
| 9             | 7             | 0           | -3.556352               | -0.794688 | 0.332654  |
| 10            | 7             | 0           | 0.819125                | -0.296030 | 0.718613  |
| 11            | 1             | 0           | 0.479643                | -1.245219 | 0.758046  |
| 12            | 6             | 0           | 1.995314                | -0.064320 | 0.050331  |
| 13            | 6             | 0           | 2.822293                | -1.293016 | -0.255944 |
| 14            | 1             | 0           | 2.505284                | -2.171270 | 0.310046  |
| 15            | 1             | 0           | 2.741100                | -1.507978 | -1.324717 |
| 16            | 1             | 0           | 3.867376                | -1.073054 | -0.034843 |
| 17            | 8             | 0           | 2.345954                | 1.066161  | -0.266031 |

**ggg<sup>-</sup>**, E = -450.5031219 a.u.

| Center Number | Atomic Number | Atomic Type | Coordinates (Angstroms) |          |           |
|---------------|---------------|-------------|-------------------------|----------|-----------|
|               |               |             | X                       | Y        | Z         |
| 1             | 6             | 0           | 0.137588                | 1.423380 | -0.759689 |
| 2             | 1             | 0           | 0.369162                | 0.711650 | -1.555466 |
| 3             | 1             | 0           | 0.041636                | 2.418368 | -1.207155 |
| 4             | 6             | 0           | 1.264174                | 1.445714 | 0.273716  |
| 5             | 1             | 0           | 2.203424                | 1.744564 | -0.210877 |

|    |   |   |           |           |           |
|----|---|---|-----------|-----------|-----------|
| 6  | 1 | 0 | 1.042004  | 2.167171  | 1.062750  |
| 7  | 7 | 0 | 1.417898  | 0.155158  | 0.967441  |
| 8  | 7 | 0 | 1.864377  | -0.760363 | 0.257959  |
| 9  | 7 | 0 | 2.281476  | -1.693330 | -0.277479 |
| 10 | 7 | 0 | -1.129073 | 1.019601  | -0.189775 |
| 11 | 1 | 0 | -1.558951 | 1.628668  | 0.490725  |
| 12 | 6 | 0 | -1.506987 | -0.303479 | -0.185239 |
| 13 | 6 | 0 | -2.700268 | -0.621374 | 0.688183  |
| 14 | 1 | 0 | -3.340574 | 0.246867  | 0.859908  |
| 15 | 1 | 0 | -3.277632 | -1.417253 | 0.217837  |
| 16 | 1 | 0 | -2.333741 | -0.986835 | 1.651782  |
| 17 | 8 | 0 | -0.919389 | -1.153263 | -0.839794 |

-----  
 **$g^-gg$ , E = -450.5066436 a.u.**  
 -----

| Center<br>Number | Atomic<br>Number | Atomic<br>Type | Coordinates (Angstroms) |           |           |
|------------------|------------------|----------------|-------------------------|-----------|-----------|
|                  |                  |                | X                       | Y         | Z         |
| 1                | 6                | 0              | 0.356563                | -1.597626 | 0.571731  |
| 2                | 1                | 0              | 0.840004                | -1.879913 | 1.509542  |
| 3                | 1                | 0              | -0.160587               | -2.470533 | 0.161637  |
| 4                | 6                | 0              | 1.410910                | -1.135137 | -0.432497 |
| 5                | 1                | 0              | 2.163308                | -1.913603 | -0.567864 |
| 6                | 1                | 0              | 0.940720                | -0.918904 | -1.396114 |
| 7                | 7                | 0              | 2.141776                | 0.049684  | 0.065690  |
| 8                | 7                | 0              | 1.553171                | 1.130473  | -0.071840 |
| 9                | 7                | 0              | 1.141911                | 2.207702  | -0.160757 |
| 10               | 7                | 0              | -0.616299               | -0.563844 | 0.865057  |
| 11               | 1                | 0              | -0.497846               | -0.002583 | 1.694461  |
| 12               | 6                | 0              | -1.510956               | -0.151130 | -0.088468 |
| 13               | 6                | 0              | -2.325833               | 1.067160  | 0.279939  |
| 14               | 1                | 0              | -2.499031               | 1.141254  | 1.355983  |
| 15               | 1                | 0              | -1.784170               | 1.959748  | -0.048327 |
| 16               | 1                | 0              | -3.279269               | 1.025442  | -0.245889 |
| 17               | 8                | 0              | -1.606393               | -0.726077 | -1.166838 |

-----  
 **$g^-gg^-$ , E = -450.5039351 a.u.**  
 -----

| Center<br>Number | Atomic<br>Number | Atomic<br>Type | Coordinates (Angstroms) |           |           |
|------------------|------------------|----------------|-------------------------|-----------|-----------|
|                  |                  |                | X                       | Y         | Z         |
| 1                | 6                | 0              | -0.651730               | -1.607246 | 0.075627  |
| 2                | 1                | 0              | -0.473211               | -1.730332 | -0.994304 |
| 3                | 1                | 0              | -0.754712               | -2.597583 | 0.533942  |
| 4                | 6                | 0              | -1.940683               | -0.818009 | 0.289103  |
| 5                | 1                | 0              | -2.789955               | -1.386423 | -0.094195 |
| 6                | 1                | 0              | -2.104195               | -0.632046 | 1.359506  |
| 7                | 7                | 0              | -1.952238               | 0.451790  | -0.453919 |
| 8                | 7                | 0              | -1.165480               | 1.323532  | -0.060823 |
| 9                | 7                | 0              | -0.521348               | 2.248243  | 0.198662  |
| 10               | 7                | 0              | 0.502531                | -0.923656 | 0.616931  |
| 11               | 1                | 0              | 0.615555                | -0.866676 | 1.617816  |
| 12               | 6                | 0              | 1.439989                | -0.311029 | -0.183881 |
| 13               | 6                | 0              | 2.506582                | 0.451975  | 0.567683  |
| 14               | 1                | 0              | 2.678495                | 0.060267  | 1.573101  |

|    |   |   |          |           |           |
|----|---|---|----------|-----------|-----------|
| 15 | 1 | 0 | 3.433187 | 0.418023  | -0.005042 |
| 16 | 1 | 0 | 2.184682 | 1.494734  | 0.645697  |
| 17 | 8 | 0 | 1.380118 | -0.344184 | -1.404208 |

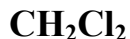

**1,2-Diazidoethane**

**aaa**, E = -406.1988205 a.u.

| Center Number | Atomic Number | Atomic Type | Coordinates (Angstroms) |           |           |
|---------------|---------------|-------------|-------------------------|-----------|-----------|
|               |               |             | X                       | Y         | Z         |
| 1             | 6             | 0           | -0.395994               | 0.646080  | 0.111031  |
| 2             | 1             | 0           | -1.057577               | 0.679248  | 0.982827  |
| 3             | 1             | 0           | -0.995939               | 0.721836  | -0.801326 |
| 4             | 6             | 0           | 0.395994                | -0.646080 | 0.111031  |
| 5             | 1             | 0           | 0.995939                | -0.721836 | -0.801326 |
| 6             | 1             | 0           | 1.057577                | -0.679248 | 0.982827  |
| 7             | 7             | 0           | 0.593820                | 1.742538  | 0.179267  |
| 8             | 7             | 0           | 0.145301                | 2.870464  | -0.053443 |
| 9             | 7             | 0           | -0.145301               | 3.970406  | -0.246921 |
| 10            | 7             | 0           | -0.593820               | -1.742538 | 0.179267  |
| 11            | 7             | 0           | -0.145301               | -2.870464 | -0.053443 |
| 12            | 7             | 0           | 0.145301                | -3.970406 | -0.246921 |

**aag**, E = -406.1991311 a.u.

| Center Number | Atomic Number | Atomic Type | Coordinates (Angstroms) |           |           |
|---------------|---------------|-------------|-------------------------|-----------|-----------|
|               |               |             | X                       | Y         | Z         |
| 1             | 6             | 0           | -0.398356               | 0.007714  | 0.228785  |
| 2             | 1             | 0           | -0.533379               | 0.047227  | 1.314644  |
| 3             | 1             | 0           | -0.103060               | -1.007436 | -0.060907 |
| 4             | 6             | 0           | 0.659198                | 1.014725  | -0.195897 |
| 5             | 1             | 0           | 0.774638                | 1.009068  | -1.284871 |
| 6             | 1             | 0           | 0.376706                | 2.016129  | 0.126406  |
| 7             | 7             | 0           | -1.646427               | 0.386318  | -0.470415 |
| 8             | 7             | 0           | -2.664951               | -0.185860 | -0.065668 |
| 9             | 7             | 0           | -3.683893               | -0.648913 | 0.215533  |
| 10            | 7             | 0           | 1.946607                | 0.725869  | 0.468501  |
| 11            | 7             | 0           | 2.542170                | -0.276977 | 0.052535  |
| 12            | 7             | 0           | 3.209357                | -1.171811 | -0.242286 |

**gag**, E = -406.1995517 a.u.

| Center Number | Atomic Number | Atomic Type | Coordinates (Angstroms) |           |           |
|---------------|---------------|-------------|-------------------------|-----------|-----------|
|               |               |             | X                       | Y         | Z         |
| 1             | 6             | 0           | -0.750319               | 0.141506  | -0.704163 |
| 2             | 1             | 0           | -1.026265               | 0.688438  | -1.605080 |
| 3             | 1             | 0           | -1.034882               | 0.734882  | 0.172493  |
| 4             | 6             | 0           | 0.750319                | -0.141506 | -0.704163 |

|    |   |   |           |           |           |
|----|---|---|-----------|-----------|-----------|
| 5  | 1 | 0 | 1.034882  | -0.734882 | 0.172493  |
| 6  | 1 | 0 | 1.026265  | -0.688438 | -1.605080 |
| 7  | 7 | 0 | -1.520914 | -1.119238 | -0.741309 |
| 8  | 7 | 0 | -1.520914 | -1.764699 | 0.315806  |
| 9  | 7 | 0 | -1.617759 | -2.458214 | 1.233727  |
| 10 | 7 | 0 | 1.520914  | 1.119238  | -0.741309 |
| 11 | 7 | 0 | 1.520914  | 1.764699  | 0.315806  |
| 12 | 7 | 0 | 1.617759  | 2.458214  | 1.233727  |

-----  
**gag-**, E = -406.1994448 a.u.  
 -----

| Center<br>Number | Atomic<br>Number | Atomic<br>Type | Coordinates (Angstroms) |           |           |
|------------------|------------------|----------------|-------------------------|-----------|-----------|
|                  |                  |                | X                       | Y         | Z         |
| 1                | 6                | 0              | 0.365666                | -0.614941 | 0.265941  |
| 2                | 1                | 0              | 0.365881                | -0.619839 | 1.356584  |
| 3                | 1                | 0              | 1.401559                | -0.621581 | -0.088814 |
| 4                | 6                | 0              | -0.365666               | 0.614941  | -0.265941 |
| 5                | 1                | 0              | -0.365881               | 0.619839  | -1.356584 |
| 6                | 1                | 0              | -1.401559               | 0.621581  | 0.088814  |
| 7                | 7                | 0              | -0.335251               | -1.853474 | -0.133124 |
| 8                | 7                | 0              | -0.247816               | -2.142023 | -1.334330 |
| 9                | 7                | 0              | -0.239151               | -2.536471 | -2.419288 |
| 10               | 7                | 0              | 0.335251                | 1.853474  | 0.133124  |
| 11               | 7                | 0              | 0.247816                | 2.142023  | 1.334330  |
| 12               | 7                | 0              | 0.239151                | 2.536471  | 2.419288  |

-----  
**aga**, E = -406.2006827 a.u.  
 -----

| Center<br>Number | Atomic<br>Number | Atomic<br>Type | Coordinates (Angstroms) |           |           |
|------------------|------------------|----------------|-------------------------|-----------|-----------|
|                  |                  |                | X                       | Y         | Z         |
| 1                | 6                | 0              | -0.288768               | -0.697219 | 1.035275  |
| 2                | 1                | 0              | -0.003550               | -1.207899 | 1.961217  |
| 3                | 1                | 0              | -1.380992               | -0.648297 | 0.970503  |
| 4                | 6                | 0              | 0.288768                | 0.697219  | 1.035275  |
| 5                | 1                | 0              | 0.003550                | 1.207899  | 1.961217  |
| 6                | 1                | 0              | 1.380992                | 0.648297  | 0.970503  |
| 7                | 7                | 0              | -0.268174               | 1.416312  | -0.131240 |
| 8                | 7                | 0              | 0.288768                | 2.484392  | -0.406323 |
| 9                | 7                | 0              | 0.268174                | -1.416312 | -0.131240 |
| 10               | 7                | 0              | -0.288768               | -2.484392 | -0.406323 |
| 11               | 7                | 0              | 0.721701                | 3.491369  | -0.768633 |
| 12               | 7                | 0              | -0.721701               | -3.491369 | -0.768633 |

-----  
**agg**, E = -406.2007007 a.u.  
 -----

| Center<br>Number | Atomic<br>Number | Atomic<br>Type | Coordinates (Angstroms) |          |           |
|------------------|------------------|----------------|-------------------------|----------|-----------|
|                  |                  |                | X                       | Y        | Z         |
| 1                | 6                | 0              | -0.891090               | 1.389787 | 0.082519  |
| 2                | 1                | 0              | -1.535022               | 1.760104 | 0.887900  |
| 3                | 1                | 0              | -0.671297               | 2.209880 | -0.600402 |
| 4                | 6                | 0              | 0.391879                | 0.845860 | 0.679362  |
| 5                | 1                | 0              | 0.860698                | 1.623332 | 1.292855  |

|    |   |   |           |           |           |
|----|---|---|-----------|-----------|-----------|
| 6  | 1 | 0 | 0.182623  | -0.021970 | 1.316310  |
| 7  | 7 | 0 | 1.287338  | 0.467156  | -0.433910 |
| 8  | 7 | 0 | 2.199598  | -0.311519 | -0.135613 |
| 9  | 7 | 0 | -1.611540 | 0.385632  | -0.729759 |
| 10 | 7 | 0 | -1.985166 | -0.619345 | -0.113200 |
| 11 | 7 | 0 | 3.091741  | -1.028895 | 0.010973  |
| 12 | 7 | 0 | -2.387933 | -1.605204 | 0.334660  |

-----  
**agg<sup>-</sup>**, E = -406.202335 a.u.  
 -----

| Center<br>Number | Atomic<br>Number | Atomic<br>Type | Coordinates (Angstroms) |           |           |
|------------------|------------------|----------------|-------------------------|-----------|-----------|
|                  |                  |                | X                       | Y         | Z         |
| 1                | 6                | 0              | 1.017453                | 1.396852  | 0.247848  |
| 2                | 1                | 0              | 1.389522                | 2.377229  | -0.050345 |
| 3                | 1                | 0              | 1.168702                | 1.271595  | 1.325378  |
| 4                | 6                | 0              | -0.456384               | 1.296915  | -0.088712 |
| 5                | 1                | 0              | -1.001604               | 2.107587  | 0.408089  |
| 6                | 1                | 0              | -0.599100               | 1.368748  | -1.171951 |
| 7                | 7                | 0              | -0.928756               | -0.015622 | 0.405874  |
| 8                | 7                | 0              | -2.061732               | -0.344712 | 0.039294  |
| 9                | 7                | 0              | 1.824653                | 0.416906  | -0.505976 |
| 10               | 7                | 0              | 1.781861                | -0.750872 | -0.096160 |
| 11               | 7                | 0              | -3.102846               | -0.763517 | -0.230603 |
| 12               | 7                | 0              | 1.869116                | -1.869006 | 0.178144  |

-----  
**ggg**, E = -406.2009138 a.u.  
 -----

| Center<br>Number | Atomic<br>Number | Atomic<br>Type | Coordinates (Angstroms) |           |           |
|------------------|------------------|----------------|-------------------------|-----------|-----------|
|                  |                  |                | X                       | Y         | Z         |
| 1                | 6                | 0              | -0.711404               | -0.272072 | 1.039564  |
| 2                | 1                | 0              | -0.856037               | -0.894550 | 1.930101  |
| 3                | 1                | 0              | -1.440013               | 0.539315  | 1.064643  |
| 4                | 6                | 0              | 0.711404                | 0.272072  | 1.039564  |
| 5                | 1                | 0              | 0.856037                | 0.894550  | 1.930101  |
| 6                | 1                | 0              | 1.440013                | -0.539315 | 1.064643  |
| 7                | 7                | 0              | 1.028083                | 1.035689  | -0.185256 |
| 8                | 7                | 0              | 0.299543                | 2.011021  | -0.404336 |
| 9                | 7                | 0              | -1.028083               | -1.035689 | -0.185256 |
| 10               | 7                | 0              | -0.299543               | -2.011021 | -0.404336 |
| 11               | 7                | 0              | -0.299543               | 2.943581  | -0.729284 |
| 12               | 7                | 0              | 0.299543                | -2.943581 | -0.729284 |

-----  
**g<sup>-</sup>gg<sup>-</sup>**, E = -406.2024919 a.u.  
 -----

| Center<br>Number | Atomic<br>Number | Atomic<br>Type | Coordinates (Angstroms) |          |           |
|------------------|------------------|----------------|-------------------------|----------|-----------|
|                  |                  |                | X                       | Y        | Z         |
| 1                | 6                | 0              | 1.337587                | 1.181686 | 0.052534  |
| 2                | 1                | 0              | 1.996901                | 1.884744 | -0.458288 |
| 3                | 1                | 0              | 1.630185                | 1.116051 | 1.105480  |
| 4                | 6                | 0              | -0.100964               | 1.665902 | -0.064580 |
| 5                | 1                | 0              | -0.184243               | 2.656553 | 0.386898  |
| 6                | 1                | 0              | -0.395625               | 1.724221 | -1.116483 |



|    |   |   |           |           |           |
|----|---|---|-----------|-----------|-----------|
| 7  | 7 | 0 | -1.009817 | 0.774607  | 0.689459  |
| 8  | 7 | 0 | -1.642843 | -0.048082 | 0.016135  |
| 9  | 7 | 0 | 1.534244  | -0.116549 | -0.621685 |
| 10 | 7 | 0 | 1.111003  | -1.110543 | -0.015348 |
| 11 | 7 | 0 | -2.289206 | -0.865481 | -0.480624 |
| 12 | 7 | 0 | 0.801339  | -2.129252 | 0.434159  |

-----  
**ggg**, E = -406.202462 a.u.  
 -----

| Center<br>Number | Atomic<br>Number | Atomic<br>Type | Coordinates (Angstroms) |           |           |
|------------------|------------------|----------------|-------------------------|-----------|-----------|
|                  |                  |                | X                       | Y         | Z         |
| 1                | 6                | 0              | -0.447556               | 1.487767  | -0.385723 |
| 2                | 1                | 0              | -1.232987               | 2.132593  | 0.025222  |
| 3                | 1                | 0              | -0.017667               | 1.961751  | -1.267376 |
| 4                | 6                | 0              | 0.632579                | 1.261974  | 0.663102  |
| 5                | 1                | 0              | 1.040081                | 2.224821  | 0.973825  |
| 6                | 1                | 0              | 0.221398                | 0.758808  | 1.546738  |
| 7                | 7                | 0              | 1.772887                | 0.496968  | 0.122207  |
| 8                | 7                | 0              | 1.578500                | -0.715185 | -0.040558 |
| 9                | 7                | 0              | -1.020266               | 0.211431  | -0.867916 |
| 10               | 7                | 0              | -1.697341               | -0.411660 | -0.040058 |
| 11               | 7                | 0              | 1.559537                | -1.856493 | -0.217391 |
| 12               | 7                | 0              | -2.353455               | -1.093120 | 0.623334  |

## 2-Azidoethanamine

**aaa**, E = -298.1491479 a.u.  
 -----

| Center<br>Number | Atomic<br>Number | Atomic<br>Type | Coordinates (Angstroms) |           |           |
|------------------|------------------|----------------|-------------------------|-----------|-----------|
|                  |                  |                | X                       | Y         | Z         |
| 1                | 6                | 0              | -1.497475               | 0.745199  | 0.000000  |
| 2                | 1                | 0              | -1.945644               | 0.280350  | 0.882272  |
| 3                | 1                | 0              | -1.945644               | 0.280350  | -0.882272 |
| 4                | 6                | 0              | 0.000000                | 0.462392  | 0.000000  |
| 5                | 1                | 0              | 0.467599                | 0.895570  | -0.892147 |
| 6                | 1                | 0              | 0.467599                | 0.895570  | 0.892147  |
| 7                | 7                | 0              | 0.183365                | -1.010877 | 0.000000  |
| 8                | 7                | 0              | 1.356517                | -1.395607 | 0.000000  |
| 9                | 7                | 0              | 2.405326                | -1.880203 | 0.000000  |
| 10               | 7                | 0              | -1.830167               | 2.166389  | 0.000000  |
| 11               | 1                | 0              | -1.432171               | 2.622353  | 0.815367  |
| 12               | 1                | 0              | -1.432171               | 2.622353  | -0.815367 |

-----  
**aag**, E = -298.1488009 a.u.  
 -----

| Center<br>Number | Atomic<br>Number | Atomic<br>Type | Coordinates (Angstroms) |           |           |
|------------------|------------------|----------------|-------------------------|-----------|-----------|
|                  |                  |                | X                       | Y         | Z         |
| 1                | 6                | 0              | 1.578840                | 0.494193  | -0.046904 |
| 2                | 1                | 0              | 1.585238                | 1.189257  | 0.803174  |
| 3                | 1                | 0              | 1.559594                | 1.087176  | -0.964555 |
| 4                | 6                | 0              | 0.317121                | -0.347028 | 0.023946  |

|    |   |   |           |           |           |
|----|---|---|-----------|-----------|-----------|
| 5  | 1 | 0 | 0.222712  | -0.958590 | -0.879055 |
| 6  | 1 | 0 | 0.348839  | -1.007194 | 0.898843  |
| 7  | 7 | 0 | -0.835753 | 0.578788  | 0.144627  |
| 8  | 7 | 0 | -1.945954 | 0.055824  | 0.009787  |
| 9  | 7 | 0 | -3.036517 | -0.310495 | -0.094436 |
| 10 | 7 | 0 | 2.738771  | -0.397472 | -0.093763 |
| 11 | 1 | 0 | 3.575563  | 0.137171  | -0.303041 |
| 12 | 1 | 0 | 2.888470  | -0.817326 | 0.818879  |

-----  
***gaa***, E = -298.149675 a.u.  
 -----

| Center<br>Number | Atomic<br>Number | Atomic<br>Type | Coordinates (Angstroms) |           |           |
|------------------|------------------|----------------|-------------------------|-----------|-----------|
|                  |                  |                | X                       | Y         | Z         |
| 1                | 6                | 0              | 1.196130                | -0.351112 | -0.383638 |
| 2                | 1                | 0              | 1.211413                | -0.176879 | -1.462921 |
| 3                | 1                | 0              | 0.677017                | -1.299625 | -0.212455 |
| 4                | 6                | 0              | 0.413076                | 0.780080  | 0.284724  |
| 5                | 1                | 0              | 0.365572                | 0.624738  | 1.369339  |
| 6                | 1                | 0              | 0.890888                | 1.741366  | 0.091044  |
| 7                | 7                | 0              | -0.957237               | 0.904696  | -0.269284 |
| 8                | 7                | 0              | -1.717566               | -0.035664 | -0.012639 |
| 9                | 7                | 0              | -2.532875               | -0.836613 | 0.159625  |
| 10               | 7                | 0              | 2.569799                | -0.487162 | 0.091398  |
| 11               | 1                | 0              | 3.083153                | 0.374440  | -0.068202 |
| 12               | 1                | 0              | 2.581872                | -0.654652 | 1.092985  |

-----  
***gag***, E = -298.1491991 a.u.  
 -----

| Center<br>Number | Atomic<br>Number | Atomic<br>Type | Coordinates (Angstroms) |           |           |
|------------------|------------------|----------------|-------------------------|-----------|-----------|
|                  |                  |                | X                       | Y         | Z         |
| 1                | 6                | 0              | -1.186362               | -0.369221 | 0.328003  |
| 2                | 1                | 0              | -1.157814               | -0.278676 | 1.422000  |
| 3                | 1                | 0              | -0.699408               | -1.311613 | 0.058938  |
| 4                | 6                | 0              | -0.403406               | 0.789937  | -0.275706 |
| 5                | 1                | 0              | -0.346784               | 0.683741  | -1.364063 |
| 6                | 1                | 0              | -0.884590               | 1.740513  | -0.041490 |
| 7                | 7                | 0              | 0.958126                | 0.892111  | 0.302232  |
| 8                | 7                | 0              | 1.719611                | -0.039905 | 0.019930  |
| 9                | 7                | 0              | 2.534327                | -0.837176 | -0.169860 |
| 10               | 7                | 0              | -2.537544               | -0.375762 | -0.235319 |
| 11               | 1                | 0              | -3.020042               | -1.226306 | 0.036940  |
| 12               | 1                | 0              | -3.074398               | 0.393164  | 0.155018  |

-----  
***gag<sup>-</sup>***, E = -298.1491328 a.u.  
 -----

| Center<br>Number | Atomic<br>Number | Atomic<br>Type | Coordinates (Angstroms) |           |           |
|------------------|------------------|----------------|-------------------------|-----------|-----------|
|                  |                  |                | X                       | Y         | Z         |
| 1                | 6                | 0              | 1.204808                | -0.306163 | -0.392588 |
| 2                | 1                | 0              | 1.268485                | -0.096209 | -1.463234 |
| 3                | 1                | 0              | 0.672104                | -1.260243 | -0.270390 |
| 4                | 6                | 0              | 0.401722                | 0.803570  | 0.273940  |
| 5                | 1                | 0              | 0.354984                | 0.647732  | 1.358528  |

|    |   |   |           |           |           |
|----|---|---|-----------|-----------|-----------|
| 6  | 1 | 0 | 0.863544  | 1.770752  | 0.079814  |
| 7  | 7 | 0 | -0.970102 | 0.895292  | -0.279506 |
| 8  | 7 | 0 | -1.713480 | -0.055719 | -0.012987 |
| 9  | 7 | 0 | -2.515578 | -0.867882 | 0.167767  |
| 10 | 7 | 0 | 2.558062  | -0.316794 | 0.164815  |
| 11 | 1 | 0 | 2.540050  | -0.695126 | 1.107305  |
| 12 | 1 | 0 | 3.149332  | -0.935623 | -0.380759 |

-----  
**aga**, E = -298.1508327 a.u.  
 -----

| Center<br>Number | Atomic<br>Number | Atomic<br>Type | Coordinates (Angstroms) |           |           |
|------------------|------------------|----------------|-------------------------|-----------|-----------|
|                  |                  |                | X                       | Y         | Z         |
| 1                | 6                | 0              | -1.756393               | 0.481560  | -0.164318 |
| 2                | 1                | 0              | -1.842999               | 0.671837  | -1.238082 |
| 3                | 1                | 0              | -2.433566               | 1.171787  | 0.347231  |
| 4                | 6                | 0              | -0.335966               | 0.805340  | 0.274869  |
| 5                | 1                | 0              | -0.100291               | 1.857710  | 0.078737  |
| 6                | 1                | 0              | -0.214977               | 0.602563  | 1.345643  |
| 7                | 7                | 0              | 0.580992                | -0.063053 | -0.506711 |
| 8                | 7                | 0              | 1.738732                | -0.128653 | -0.083781 |
| 9                | 7                | 0              | 2.847480                | -0.267542 | 0.209079  |
| 10               | 7                | 0              | -2.190299               | -0.886567 | 0.100948  |
| 11               | 1                | 0              | -1.538103               | -1.533612 | -0.333228 |
| 12               | 1                | 0              | -2.154251               | -1.070980 | 1.099644  |

-----  
**agg**, E = -298.1508842 a.u.  
 -----

| Center<br>Number | Atomic<br>Number | Atomic<br>Type | Coordinates (Angstroms) |           |           |
|------------------|------------------|----------------|-------------------------|-----------|-----------|
|                  |                  |                | X                       | Y         | Z         |
| 1                | 6                | 0              | 1.745881                | 0.487190  | 0.168493  |
| 2                | 1                | 0              | 1.832861                | 0.637624  | 1.253560  |
| 3                | 1                | 0              | 2.415381                | 1.198451  | -0.323345 |
| 4                | 6                | 0              | 0.329392                | 0.814316  | -0.251796 |
| 5                | 1                | 0              | 0.080459                | 1.850157  | 0.001672  |
| 6                | 1                | 0              | 0.216119                | 0.660096  | -1.330154 |
| 7                | 7                | 0              | -0.576318               | -0.106304 | 0.485130  |
| 8                | 7                | 0              | -1.742211               | -0.137722 | 0.080909  |
| 9                | 7                | 0              | -2.855988               | -0.255059 | -0.201867 |
| 10               | 7                | 0              | 2.095432                | -0.864869 | -0.267917 |
| 11               | 1                | 0              | 3.051416                | -1.075838 | 0.002308  |
| 12               | 1                | 0              | 1.505721                | -1.531853 | 0.221990  |

-----  
**gga**, E = -298.1508857 a.u.  
 -----

| Center<br>Number | Atomic<br>Number | Atomic<br>Type | Coordinates (Angstroms) |           |           |
|------------------|------------------|----------------|-------------------------|-----------|-----------|
|                  |                  |                | X                       | Y         | Z         |
| 1                | 6                | 0              | 1.317476                | -0.043699 | 0.678770  |
| 2                | 1                | 0              | 0.707082                | -0.688939 | 1.319801  |
| 3                | 1                | 0              | 2.079136                | 0.413316  | 1.318331  |
| 4                | 6                | 0              | 0.444383                | 1.073664  | 0.113913  |
| 5                | 1                | 0              | 0.025899                | 1.685692  | 0.921870  |
| 6                | 1                | 0              | 1.025198                | 1.714917  | -0.550533 |

|    |   |   |           |           |           |
|----|---|---|-----------|-----------|-----------|
| 7  | 7 | 0 | -0.653252 | 0.538101  | -0.732701 |
| 8  | 7 | 0 | -1.528318 | -0.085316 | -0.121356 |
| 9  | 7 | 0 | -2.413669 | -0.678834 | 0.325700  |
| 10 | 7 | 0 | 1.981864  | -0.878222 | -0.318018 |
| 11 | 1 | 0 | 1.290232  | -1.270470 | -0.950543 |
| 12 | 1 | 0 | 2.594927  | -0.304411 | -0.890395 |

-----  
**ggg**, E = -298.1508233 a.u.

| Center<br>Number | Atomic<br>Number | Atomic<br>Type | Coordinates (Angstroms) |           |           |
|------------------|------------------|----------------|-------------------------|-----------|-----------|
|                  |                  |                | X                       | Y         | Z         |
| 1                | 6                | 0              | 1.320887                | -0.012216 | 0.662417  |
| 2                | 1                | 0              | 0.716045                | -0.657429 | 1.317473  |
| 3                | 1                | 0              | 2.089785                | 0.455638  | 1.284543  |
| 4                | 6                | 0              | 0.437081                | 1.088669  | 0.103548  |
| 5                | 1                | 0              | 0.015933                | 1.695653  | 0.912173  |
| 6                | 1                | 0              | 1.009275                | 1.727963  | -0.568252 |
| 7                | 7                | 0              | -0.661768               | 0.535003  | -0.732779 |
| 8                | 7                | 0              | -1.521292               | -0.099473 | -0.110763 |
| 9                | 7                | 0              | -2.392442               | -0.705627 | 0.347074  |
| 10               | 7                | 0              | 1.975459                | -0.732902 | -0.429293 |
| 11               | 1                | 0              | 2.550210                | -1.480221 | -0.051696 |
| 12               | 1                | 0              | 1.271234                | -1.179335 | -1.009704 |

-----  
**ggg**<sup>-</sup>, E = -298.1493907 a.u.

| Center<br>Number | Atomic<br>Number | Atomic<br>Type | Coordinates (Angstroms) |           |           |
|------------------|------------------|----------------|-------------------------|-----------|-----------|
|                  |                  |                | X                       | Y         | Z         |
| 1                | 6                | 0              | 1.280308                | -0.056434 | 0.631425  |
| 2                | 1                | 0              | 0.672578                | -0.619467 | 1.347303  |
| 3                | 1                | 0              | 2.151871                | 0.328816  | 1.179998  |
| 4                | 6                | 0              | 0.497393                | 1.152096  | 0.142602  |
| 5                | 1                | 0              | 0.228561                | 1.786076  | 0.994886  |
| 6                | 1                | 0              | 1.093243                | 1.745328  | -0.552939 |
| 7                | 7                | 0              | -0.728444               | 0.796436  | -0.613745 |
| 8                | 7                | 0              | -1.440279               | -0.066801 | -0.094452 |
| 9                | 7                | 0              | -2.187686               | -0.866798 | 0.276618  |
| 10               | 7                | 0              | 1.616355                | -0.947116 | -0.477905 |
| 11               | 1                | 0              | 2.243730                | -0.471537 | -1.120439 |
| 12               | 1                | 0              | 2.124185                | -1.753229 | -0.126582 |

-----  
**g-ga**, E = -298.1502543 a.u.

| Center<br>Number | Atomic<br>Number | Atomic<br>Type | Coordinates (Angstroms) |           |           |
|------------------|------------------|----------------|-------------------------|-----------|-----------|
|                  |                  |                | X                       | Y         | Z         |
| 1                | 6                | 0              | 1.682521                | -0.123308 | -0.122471 |
| 2                | 1                | 0              | 1.908780                | -0.365460 | -1.164383 |
| 3                | 1                | 0              | 2.577679                | -0.343585 | 0.468947  |
| 4                | 6                | 0              | 0.572305                | -1.050722 | 0.368301  |
| 5                | 1                | 0              | 0.879552                | -2.092678 | 0.260924  |
| 6                | 1                | 0              | 0.346508                | -0.857579 | 1.423756  |
| 7                | 7                | 0              | -0.661856               | -0.910889 | -0.443190 |

|    |   |   |           |           |           |
|----|---|---|-----------|-----------|-----------|
| 8  | 7 | 0 | -1.451491 | -0.033824 | -0.077330 |
| 9  | 7 | 0 | -2.289956 | 0.721454  | 0.172953  |
| 10 | 7 | 0 | 1.402215  | 1.305281  | -0.037247 |
| 11 | 1 | 0 | 0.654828  | 1.566248  | -0.671500 |
| 12 | 1 | 0 | 1.111321  | 1.563090  | 0.900976  |

g<sup>-</sup>gg, E = -298.1504465 a.u.

| Center<br>Number | Atomic<br>Number | Atomic<br>Type | Coordinates (Angstroms) |           |           |
|------------------|------------------|----------------|-------------------------|-----------|-----------|
|                  |                  |                | X                       | Y         | Z         |
| 1                | 6                | 0              | 1.673695                | -0.125480 | -0.097829 |
| 2                | 1                | 0              | 1.960660                | -0.368974 | -1.129035 |
| 3                | 1                | 0              | 2.542659                | -0.302691 | 0.543089  |
| 4                | 6                | 0              | 0.573932                | -1.075935 | 0.346249  |
| 5                | 1                | 0              | 0.878105                | -2.111802 | 0.189085  |
| 6                | 1                | 0              | 0.345266                | -0.923430 | 1.406138  |
| 7                | 7                | 0              | -0.654856               | -0.893381 | -0.466488 |
| 8                | 7                | 0              | -1.440975               | -0.026104 | -0.069810 |
| 9                | 7                | 0              | -2.275972               | 0.725989  | 0.198996  |
| 10               | 7                | 0              | 1.238089                | 1.262895  | 0.072221  |
| 11               | 1                | 0              | 2.044624                | 1.878722  | 0.080999  |
| 12               | 1                | 0              | 0.678923                | 1.550862  | -0.725240 |

g<sup>-</sup>gg<sup>-</sup>, E = -298.1510454 a.u.

| Center<br>Number | Atomic<br>Number | Atomic<br>Type | Coordinates (Angstroms) |           |           |
|------------------|------------------|----------------|-------------------------|-----------|-----------|
|                  |                  |                | X                       | Y         | Z         |
| 1                | 6                | 0              | 1.615678                | -0.111372 | -0.217111 |
| 2                | 1                | 0              | 1.670679                | -0.267608 | -1.297519 |
| 3                | 1                | 0              | 2.597013                | -0.362104 | 0.211327  |
| 4                | 6                | 0              | 0.594649                | -1.078472 | 0.360562  |
| 5                | 1                | 0              | 0.930756                | -2.106857 | 0.223839  |
| 6                | 1                | 0              | 0.459327                | -0.898347 | 1.434358  |
| 7                | 7                | 0              | -0.709207               | -0.997682 | -0.332107 |
| 8                | 7                | 0              | -1.419141               | -0.021044 | -0.069314 |
| 9                | 7                | 0              | -2.211511               | 0.803655  | 0.094987  |
| 10               | 7                | 0              | 1.193616                | 1.266972  | 0.029888  |
| 11               | 1                | 0              | 1.335739                | 1.500926  | 1.008519  |
| 12               | 1                | 0              | 1.768223                | 1.909745  | -0.505412 |

## 2-Azidoethylammonium ion

aa, E = -298.5865044 a.u.

| Center<br>Number | Atomic<br>Number | Atomic<br>Type | Coordinates (Angstroms) |           |           |
|------------------|------------------|----------------|-------------------------|-----------|-----------|
|                  |                  |                | X                       | Y         | Z         |
| 1                | 6                | 0              | 1.477465                | 0.532445  | -0.043634 |
| 2                | 1                | 0              | 1.535983                | 1.222608  | 0.796773  |
| 3                | 1                | 0              | 1.482651                | 1.089359  | -0.979076 |
| 4                | 6                | 0              | 0.246114                | -0.350368 | 0.060585  |
| 5                | 1                | 0              | 0.188328                | -1.031409 | -0.796120 |

|    |   |   |           |           |           |
|----|---|---|-----------|-----------|-----------|
| 6  | 1 | 0 | 0.266296  | -0.936973 | 0.986354  |
| 7  | 7 | 0 | -0.890463 | 0.585832  | 0.065446  |
| 8  | 7 | 0 | -2.004945 | 0.048082  | -0.001288 |
| 9  | 7 | 0 | -3.096112 | -0.316907 | -0.057731 |
| 10 | 7 | 0 | 2.718202  | -0.303506 | -0.017120 |
| 11 | 1 | 0 | 2.811590  | -0.819116 | 0.861398  |
| 12 | 1 | 0 | 2.731213  | -0.987129 | -0.778028 |
| 13 | 1 | 0 | 3.555686  | 0.275696  | -0.118156 |

-----  
**ag**, E = -298.5861613 a.u.  
 -----

| Center<br>Number | Atomic<br>Number | Atomic<br>Type | Coordinates (Angstroms) |           |           |
|------------------|------------------|----------------|-------------------------|-----------|-----------|
|                  |                  |                | X                       | Y         | Z         |
| 1                | 6                | 0              | 1.150524                | -0.309287 | -0.404845 |
| 2                | 1                | 0              | 1.234046                | -0.087751 | -1.467749 |
| 3                | 1                | 0              | 0.730189                | -1.305900 | -0.270335 |
| 4                | 6                | 0              | 0.317797                | 0.752469  | 0.306014  |
| 5                | 1                | 0              | 0.225737                | 0.529336  | 1.374744  |
| 6                | 1                | 0              | 0.771392                | 1.737352  | 0.190033  |
| 7                | 7                | 0              | -1.004483               | 0.846446  | -0.332019 |
| 8                | 7                | 0              | -1.804789               | -0.049663 | -0.018104 |
| 9                | 7                | 0              | -2.654475               | -0.800574 | 0.187467  |
| 10               | 7                | 0              | 2.542301                | -0.346752 | 0.149929  |
| 11               | 1                | 0              | 3.028875                | 0.543371  | 0.013727  |
| 12               | 1                | 0              | 2.548596                | -0.552551 | 1.152315  |
| 13               | 1                | 0              | 3.101360                | -1.069133 | -0.310662 |

-----  
**ga**, E = -298.5922117 a.u.  
 -----

| Center<br>Number | Atomic<br>Number | Atomic<br>Type | Coordinates (Angstroms) |           |           |
|------------------|------------------|----------------|-------------------------|-----------|-----------|
|                  |                  |                | X                       | Y         | Z         |
| 1                | 6                | 0              | -1.672371               | 0.589770  | -0.224245 |
| 2                | 1                | 0              | -1.740339               | 0.663552  | -1.308716 |
| 3                | 1                | 0              | -2.382414               | 1.272006  | 0.240442  |
| 4                | 6                | 0              | -0.261283               | 0.850846  | 0.254790  |
| 5                | 1                | 0              | 0.047809                | 1.842480  | -0.088478 |
| 6                | 1                | 0              | -0.206200               | 0.816755  | 1.348671  |
| 7                | 7                | 0              | 0.570025                | -0.213191 | -0.344033 |
| 8                | 7                | 0              | 1.776364                | -0.160456 | -0.065543 |
| 9                | 7                | 0              | 2.911775                | -0.217320 | 0.116145  |
| 10               | 7                | 0              | -2.066028               | -0.806295 | 0.141297  |
| 11               | 1                | 0              | -1.361690               | -1.465408 | -0.206868 |
| 12               | 1                | 0              | -2.128624               | -0.929615 | 1.154768  |
| 13               | 1                | 0              | -2.971570               | -1.062629 | -0.258154 |

-----  
**gg**, E = -298.5908914 a.u.  
 -----

| Center<br>Number | Atomic<br>Number | Atomic<br>Type | Coordinates (Angstroms) |           |          |
|------------------|------------------|----------------|-------------------------|-----------|----------|
|                  |                  |                | X                       | Y         | Z        |
| 1                | 6                | 0              | 1.313064                | 0.190958  | 0.714875 |
| 2                | 1                | 0              | 0.803022                | -0.410531 | 1.467724 |
| 3                | 1                | 0              | 2.101306                | 0.776516  | 1.187325 |

|    |   |   |           |           |           |
|----|---|---|-----------|-----------|-----------|
| 4  | 6 | 0 | 0.340921  | 1.077396  | -0.045953 |
| 5  | 1 | 0 | -0.146588 | 1.759067  | 0.656247  |
| 6  | 1 | 0 | 0.860648  | 1.670468  | -0.799747 |
| 7  | 7 | 0 | -0.638983 | 0.251494  | -0.782699 |
| 8  | 7 | 0 | -1.604356 | -0.138105 | -0.103972 |
| 9  | 7 | 0 | -2.555062 | -0.550021 | 0.399458  |
| 10 | 7 | 0 | 1.958838  | -0.764143 | -0.239342 |
| 11 | 1 | 0 | 1.240941  | -1.257064 | -0.780435 |
| 12 | 1 | 0 | 2.566936  | -0.281024 | -0.905091 |
| 13 | 1 | 0 | 2.526760  | -1.462126 | 0.246325  |

## 2-Azidoethanol

*aaa*, E = -318.0004202 a.u.

| Center Number | Atomic Number | Atomic Type | Coordinates (Angstroms) |           |           |
|---------------|---------------|-------------|-------------------------|-----------|-----------|
|               |               |             | X                       | Y         | Z         |
| 1             | 6             | 0           | -1.583286               | 0.475138  | -0.082319 |
| 2             | 1             | 0           | -1.551842               | 0.977690  | -1.054534 |
| 3             | 1             | 0           | -1.630337               | 1.233029  | 0.707322  |
| 4             | 6             | 0           | -0.332873               | -0.360464 | 0.099127  |
| 5             | 1             | 0           | -0.391184               | -0.919129 | 1.038879  |
| 6             | 1             | 0           | -0.225037               | -1.063622 | -0.732764 |
| 7             | 7             | 0           | 0.810730                | 0.579032  | 0.138313  |
| 8             | 7             | 0           | 1.923217                | 0.061515  | -0.000657 |
| 9             | 7             | 0           | 3.015028                | -0.296482 | -0.113406 |
| 10            | 1             | 0           | -3.477512               | 0.071303  | -0.221260 |
| 11            | 8             | 0           | -2.683744               | -0.424471 | -0.001029 |

*aag*, E = -318.0005807 a.u.

| Center Number | Atomic Number | Atomic Type | Coordinates (Angstroms) |           |           |
|---------------|---------------|-------------|-------------------------|-----------|-----------|
|               |               |             | X                       | Y         | Z         |
| 1             | 6             | 0           | -1.592385               | 0.491686  | -0.057252 |
| 2             | 1             | 0           | -1.565255               | 1.064663  | -0.984913 |
| 3             | 1             | 0           | -1.644353               | 1.190914  | 0.784299  |
| 4             | 6             | 0           | -0.335391               | -0.354671 | 0.060404  |
| 5             | 1             | 0           | -0.372563               | -0.968912 | 0.967562  |
| 6             | 1             | 0           | -0.245073               | -1.010199 | -0.811701 |
| 7             | 7             | 0           | 0.811989                | 0.578845  | 0.134994  |
| 8             | 7             | 0           | 1.923613                | 0.056469  | 0.005771  |
| 9             | 7             | 0           | 3.014682                | -0.306765 | -0.097439 |
| 10            | 1             | 0           | -2.845482               | -0.770479 | 0.724284  |
| 11            | 8             | 0           | -2.751575               | -0.328490 | -0.125215 |

*gaa*, E = -318.0007332 a.u.

| Center Number | Atomic Number | Atomic Type | Coordinates (Angstroms) |           |          |
|---------------|---------------|-------------|-------------------------|-----------|----------|
|               |               |             | X                       | Y         | Z        |
| 1             | 6             | 0           | -1.220647               | -0.343722 | 0.361980 |
| 2             | 1             | 0           | -1.290878               | -0.170755 | 1.440999 |

|    |   |   |           |           |           |
|----|---|---|-----------|-----------|-----------|
| 3  | 1 | 0 | -0.716576 | -1.302783 | 0.190658  |
| 4  | 6 | 0 | -0.420883 | 0.781326  | -0.273251 |
| 5  | 1 | 0 | -0.352527 | 0.635601  | -1.356374 |
| 6  | 1 | 0 | -0.896797 | 1.740569  | -0.073405 |
| 7  | 7 | 0 | 0.929964  | 0.870622  | 0.323900  |
| 8  | 7 | 0 | 1.705298  | -0.044104 | 0.019728  |
| 9  | 7 | 0 | 2.535478  | -0.819470 | -0.189236 |
| 10 | 1 | 0 | -3.055391 | -0.963090 | 0.211704  |
| 11 | 8 | 0 | -2.504228 | -0.326812 | -0.253337 |

-----  
*gag*, E = -318.0008458 a.u.  
 -----

| Center<br>Number | Atomic<br>Number | Atomic<br>Type | Coordinates (Angstroms) |           |           |
|------------------|------------------|----------------|-------------------------|-----------|-----------|
|                  |                  |                | X                       | Y         | Z         |
| 1                | 6                | 0              | 1.223562                | -0.334771 | -0.391427 |
| 2                | 1                | 0              | 1.288162                | -0.126315 | -1.460240 |
| 3                | 1                | 0              | 0.720098                | -1.299636 | -0.256139 |
| 4                | 6                | 0              | 0.426939                | 0.771282  | 0.292545  |
| 5                | 1                | 0              | 0.363637                | 0.592149  | 1.372470  |
| 6                | 1                | 0              | 0.906381                | 1.734933  | 0.124184  |
| 7                | 7                | 0              | -0.929881               | 0.887263  | -0.286616 |
| 8                | 7                | 0              | -1.704229               | -0.038866 | -0.015625 |
| 9                | 7                | 0              | -2.534186               | -0.821468 | 0.166419  |
| 10               | 1                | 0              | 2.524181                | -0.657302 | 1.014805  |
| 11               | 8                | 0              | 2.559075                | -0.381425 | 0.093619  |

-----  
*gag*<sup>-</sup>, E = -318.0008896 a.u.  
 -----

| Center<br>Number | Atomic<br>Number | Atomic<br>Type | Coordinates (Angstroms) |           |           |
|------------------|------------------|----------------|-------------------------|-----------|-----------|
|                  |                  |                | X                       | Y         | Z         |
| 1                | 6                | 0              | -1.213862               | -0.369840 | 0.357731  |
| 2                | 1                | 0              | -1.257693               | -0.213445 | 1.440883  |
| 3                | 1                | 0              | -0.717540               | -1.323863 | 0.166333  |
| 4                | 6                | 0              | -0.427816               | 0.765792  | -0.289090 |
| 5                | 1                | 0              | -0.362169               | 0.611522  | -1.371171 |
| 6                | 1                | 0              | -0.913272               | 1.724030  | -0.099857 |
| 7                | 7                | 0              | 0.922858                | 0.884586  | 0.304654  |
| 8                | 7                | 0              | 1.707053                | -0.029175 | 0.020223  |
| 9                | 7                | 0              | 2.543778                | -0.802064 | -0.171601 |
| 10               | 1                | 0              | -3.006819               | 0.305410  | 0.043339  |
| 11               | 8                | 0              | -2.513533               | -0.481599 | -0.208038 |

-----  
*aga*, E = -318.0016756 a.u.  
 -----

| Center<br>Number | Atomic<br>Number | Atomic<br>Type | Coordinates (Angstroms) |          |           |
|------------------|------------------|----------------|-------------------------|----------|-----------|
|                  |                  |                | X                       | Y        | Z         |
| 1                | 6                | 0              | 1.743486                | 0.453821 | 0.165647  |
| 2                | 1                | 0              | 1.801413                | 0.571541 | 1.252959  |
| 3                | 1                | 0              | 2.419074                | 1.177040 | -0.305681 |
| 4                | 6                | 0              | 0.337242                | 0.748730 | -0.293408 |
| 5                | 1                | 0              | 0.123848                | 1.815418 | -0.165375 |
| 6                | 1                | 0              | 0.233603                | 0.484151 | -1.351293 |



|    |   |   |           |           |           |
|----|---|---|-----------|-----------|-----------|
| 7  | 7 | 0 | -0.601656 | -0.048591 | 0.530694  |
| 8  | 7 | 0 | -1.753127 | -0.126251 | 0.093110  |
| 9  | 7 | 0 | -2.858547 | -0.273874 | -0.207170 |
| 10 | 1 | 0 | 2.885262  | -1.116740 | 0.220834  |
| 11 | 8 | 0 | 2.068218  | -0.875713 | -0.225164 |

-----  
**agg**, E = -318.0013071 a.u.

| Center<br>Number | Atomic<br>Number | Atomic<br>Type | Coordinates (Angstroms) |           |           |
|------------------|------------------|----------------|-------------------------|-----------|-----------|
|                  |                  |                | X                       | Y         | Z         |
| 1                | 6                | 0              | -1.753406               | 0.452941  | -0.159117 |
| 2                | 1                | 0              | -1.827870               | 0.630486  | -1.233277 |
| 3                | 1                | 0              | -2.433227               | 1.141944  | 0.355783  |
| 4                | 6                | 0              | -0.341624               | 0.745943  | 0.305167  |
| 5                | 1                | 0              | -0.135800               | 1.816782  | 0.192550  |
| 6                | 1                | 0              | -0.224514               | 0.475172  | 1.361451  |
| 7                | 7                | 0              | 0.598523                | -0.036412 | -0.528707 |
| 8                | 7                | 0              | 1.749944                | -0.120200 | -0.091798 |
| 9                | 7                | 0              | 2.855554                | -0.272179 | 0.205565  |
| 10               | 1                | 0              | -2.121934               | -1.064144 | 0.992810  |
| 11               | 8                | 0              | -2.139328               | -0.899001 | 0.044871  |

-----  
**agg**<sup>-</sup>, E = -318.0039706 a.u.

| Center<br>Number | Atomic<br>Number | Atomic<br>Type | Coordinates (Angstroms) |           |           |
|------------------|------------------|----------------|-------------------------|-----------|-----------|
|                  |                  |                | X                       | Y         | Z         |
| 1                | 6                | 0              | 1.772387                | 0.427884  | 0.149430  |
| 2                | 1                | 0              | 1.894233                | 0.572577  | 1.229093  |
| 3                | 1                | 0              | 2.487852                | 1.064958  | -0.373240 |
| 4                | 6                | 0              | 0.367720                | 0.820886  | -0.255344 |
| 5                | 1                | 0              | 0.179157                | 1.872896  | -0.015978 |
| 6                | 1                | 0              | 0.228609                | 0.654322  | -1.328437 |
| 7                | 7                | 0              | -0.555902               | -0.047633 | 0.517575  |
| 8                | 7                | 0              | -1.710733               | -0.114236 | 0.084115  |
| 9                | 7                | 0              | -2.816259               | -0.253211 | -0.217083 |
| 10               | 1                | 0              | 1.394961                | -1.460422 | 0.195494  |
| 11               | 8                | 0              | 2.069351                | -0.911424 | -0.220462 |

-----  
**gga**, E = -318.0016592 a.u.

| Center<br>Number | Atomic<br>Number | Atomic<br>Type | Coordinates (Angstroms) |           |           |
|------------------|------------------|----------------|-------------------------|-----------|-----------|
|                  |                  |                | X                       | Y         | Z         |
| 1                | 6                | 0              | 1.304772                | -0.115357 | 0.628581  |
| 2                | 1                | 0              | 0.683501                | -0.834900 | 1.176165  |
| 3                | 1                | 0              | 2.081076                | 0.255653  | 1.308812  |
| 4                | 6                | 0              | 0.463437                | 1.062990  | 0.186323  |
| 5                | 1                | 0              | 0.106769                | 1.609619  | 1.066539  |
| 6                | 1                | 0              | 1.057105                | 1.736556  | -0.431219 |
| 7                | 7                | 0              | -0.685358               | 0.665297  | -0.661457 |
| 8                | 7                | 0              | -1.509766               | -0.074191 | -0.114521 |
| 9                | 7                | 0              | -2.351651               | -0.764767 | 0.272669  |
| 10               | 1                | 0              | 2.284186                | -1.538934 | -0.255538 |

11 8 0 1.875692 -0.712271 -0.528877

-----  
**ggg**, E = -318.0018435 a.u.

| Center<br>Number | Atomic<br>Number | Atomic<br>Type | Coordinates (Angstroms) |           |           |
|------------------|------------------|----------------|-------------------------|-----------|-----------|
|                  |                  |                | X                       | Y         | Z         |
| 1                | 6                | 0              | 1.303060                | -0.124355 | 0.633460  |
| 2                | 1                | 0              | 0.687379                | -0.773535 | 1.260870  |
| 3                | 1                | 0              | 2.143315                | 0.234957  | 1.240084  |
| 4                | 6                | 0              | 0.499365                | 1.082543  | 0.177051  |
| 5                | 1                | 0              | 0.181079                | 1.659373  | 1.053697  |
| 6                | 1                | 0              | 1.102176                | 1.729220  | -0.462055 |
| 7                | 7                | 0              | -0.676135               | 0.717514  | -0.646318 |
| 8                | 7                | 0              | -1.478260               | -0.053878 | -0.109947 |
| 9                | 7                | 0              | -2.304202               | -0.766814 | 0.270585  |
| 10               | 1                | 0              | 2.305285                | -0.390530 | -1.007046 |
| 11               | 8                | 0              | 1.747048                | -0.935796 | -0.443607 |

-----  
**ggg**<sup>-</sup>, E = -318.0034583 a.u.

| Center<br>Number | Atomic<br>Number | Atomic<br>Type | Coordinates (Angstroms) |           |           |
|------------------|------------------|----------------|-------------------------|-----------|-----------|
|                  |                  |                | X                       | Y         | Z         |
| 1                | 6                | 0              | 1.346096                | -0.058817 | 0.658595  |
| 2                | 1                | 0              | 0.750179                | -0.722928 | 1.298001  |
| 3                | 1                | 0              | 2.139165                | 0.381411  | 1.266602  |
| 4                | 6                | 0              | 0.467936                | 1.048792  | 0.105075  |
| 5                | 1                | 0              | 0.050683                | 1.653261  | 0.918137  |
| 6                | 1                | 0              | 1.045656                | 1.687832  | -0.562090 |
| 7                | 7                | 0              | -0.621996               | 0.491441  | -0.737466 |
| 8                | 7                | 0              | -1.523508               | -0.081261 | -0.111849 |
| 9                | 7                | 0              | -2.432454               | -0.626316 | 0.347318  |
| 10               | 1                | 0              | 1.291061                | -1.098383 | -0.970215 |
| 11               | 8                | 0              | 1.985596                | -0.791011 | -0.377309 |

-----  
**g<sup>-</sup>ga**, E = -318.0038721 a.u.

| Center<br>Number | Atomic<br>Number | Atomic<br>Type | Coordinates (Angstroms) |           |           |
|------------------|------------------|----------------|-------------------------|-----------|-----------|
|                  |                  |                | X                       | Y         | Z         |
| 1                | 6                | 0              | 1.607016                | -0.017422 | -0.205679 |
| 2                | 1                | 0              | 1.686623                | -0.134930 | -1.291564 |
| 3                | 1                | 0              | 2.594772                | -0.167440 | 0.246640  |
| 4                | 6                | 0              | 0.655014                | -1.056400 | 0.344579  |
| 5                | 1                | 0              | 1.051936                | -2.055496 | 0.164126  |
| 6                | 1                | 0              | 0.526150                | -0.914691 | 1.423388  |
| 7                | 7                | 0              | -0.656818               | -1.021348 | -0.336317 |
| 8                | 7                | 0              | -1.386822               | -0.060472 | -0.065220 |
| 9                | 7                | 0              | -2.187710               | 0.754761  | 0.100979  |
| 10               | 1                | 0              | 1.599450                | 1.926140  | -0.320756 |
| 11               | 8                | 0              | 1.073543                | 1.259846  | 0.131083  |

-----  
**g<sup>-</sup>gg**, E = -318.0034179 a.u.

| Center<br>Number | Atomic<br>Number | Atomic<br>Type | Coordinates (Angstroms) |           |           |
|------------------|------------------|----------------|-------------------------|-----------|-----------|
|                  |                  |                | X                       | Y         | Z         |
| 1                | 6                | 0              | 1.600962                | -0.010803 | -0.233079 |
| 2                | 1                | 0              | 1.659469                | -0.149080 | -1.313796 |
| 3                | 1                | 0              | 2.600650                | -0.146841 | 0.196198  |
| 4                | 6                | 0              | 0.660964                | -1.046295 | 0.359466  |
| 5                | 1                | 0              | 1.062595                | -2.048096 | 0.201032  |
| 6                | 1                | 0              | 0.540094                | -0.884538 | 1.437524  |
| 7                | 7                | 0              | -0.658677               | -1.036358 | -0.304592 |
| 8                | 7                | 0              | -1.386373               | -0.066658 | -0.060877 |
| 9                | 7                | 0              | -2.187293               | 0.752563  | 0.087292  |
| 10               | 1                | 0              | 1.215953                | 1.514789  | 0.906750  |
| 11               | 8                | 0              | 1.122011                | 1.313691  | -0.029848 |

### Protonated 2-azidoethanol

*aaa*, E = -318.3826646 a.u.

| Center<br>Number | Atomic<br>Number | Atomic<br>Type | Coordinates (Angstroms) |           |           |
|------------------|------------------|----------------|-------------------------|-----------|-----------|
|                  |                  |                | X                       | Y         | Z         |
| 1                | 6                | 0              | 1.430642                | 0.510843  | -0.183859 |
| 2                | 1                | 0              | 1.543483                | 1.356913  | 0.488913  |
| 3                | 1                | 0              | 1.397615                | 0.837636  | -1.219282 |
| 4                | 6                | 0              | 0.266546                | -0.381771 | 0.200254  |
| 5                | 1                | 0              | 0.116831                | -1.166319 | -0.547576 |
| 6                | 1                | 0              | 0.429560                | -0.839129 | 1.181968  |
| 7                | 7                | 0              | -0.870651               | 0.551985  | 0.246377  |
| 8                | 7                | 0              | -1.976393               | 0.045308  | 0.005092  |
| 9                | 7                | 0              | -3.058954               | -0.288675 | -0.197384 |
| 10               | 1                | 0              | 2.976617                | -0.453234 | 0.839736  |
| 11               | 1                | 0              | 2.815440                | -0.994773 | -0.644034 |
| 12               | 8                | 0              | 2.734914                | -0.209482 | -0.072086 |

*aag*, E = -318.3831717 a.u.

| Center<br>Number | Atomic<br>Number | Atomic<br>Type | Coordinates (Angstroms) |           |           |
|------------------|------------------|----------------|-------------------------|-----------|-----------|
|                  |                  |                | X                       | Y         | Z         |
| 1                | 6                | 0              | -1.446315               | 0.527605  | 0.103099  |
| 2                | 1                | 0              | -1.554093               | 1.265325  | -0.688556 |
| 3                | 1                | 0              | -1.454620               | 0.987144  | 1.087059  |
| 4                | 6                | 0              | -0.259573               | -0.388393 | -0.102208 |
| 5                | 1                | 0              | -0.137848               | -1.048634 | 0.760602  |
| 6                | 1                | 0              | -0.385316               | -0.989971 | -1.008668 |
| 7                | 7                | 0              | 0.871609                | 0.541606  | -0.249451 |
| 8                | 7                | 0              | 1.983875                | 0.049325  | -0.009548 |
| 9                | 7                | 0              | 3.071787                | -0.275447 | 0.179835  |
| 10               | 1                | 0              | -3.450283               | 0.093295  | 0.485962  |
| 11               | 1                | 0              | -2.911528               | -0.653636 | -0.801123 |
| 12               | 8                | 0              | -2.670235               | -0.337147 | 0.089190  |

*gaa*, E = -318.3826259 a.u.

| Center Number | Atomic Number | Atomic Type | Coordinates (Angstroms) |           |           |
|---------------|---------------|-------------|-------------------------|-----------|-----------|
|               |               |             | X                       | Y         | Z         |
| 1             | 6             | 0           | 1.150910                | -0.290268 | -0.428297 |
| 2             | 1             | 0           | 1.293606                | -0.004239 | -1.467050 |
| 3             | 1             | 0           | 0.763302                | -1.303431 | -0.354062 |
| 4             | 6             | 0           | 0.331611                | 0.725801  | 0.351132  |
| 5             | 1             | 0           | 0.222180                | 0.428049  | 1.398553  |
| 6             | 1             | 0           | 0.786340                | 1.715132  | 0.302849  |
| 7             | 7             | 0           | -0.971447               | 0.837638  | -0.322919 |
| 8             | 7             | 0           | -1.797534               | -0.041887 | -0.021289 |
| 9             | 7             | 0           | -2.669130               | -0.769525 | 0.170809  |
| 10            | 1             | 0           | 3.112133                | 0.361548  | -0.060834 |
| 11            | 1             | 0           | 2.607782                | -0.664115 | 1.042786  |
| 12            | 8             | 0           | 2.548289                | -0.416216 | 0.101818  |

*gag*, E = -318.3830431 a.u.

| Center Number | Atomic Number | Atomic Type | Coordinates (Angstroms) |           |           |
|---------------|---------------|-------------|-------------------------|-----------|-----------|
|               |               |             | X                       | Y         | Z         |
| 1             | 6             | 0           | -1.148431               | -0.269522 | 0.435074  |
| 2             | 1             | 0           | -1.320907               | 0.004887  | 1.473304  |
| 3             | 1             | 0           | -0.742411               | -1.274222 | 0.346680  |
| 4             | 6             | 0           | -0.328379               | 0.757039  | -0.324480 |
| 5             | 1             | 0           | -0.243336               | 0.480054  | -1.378796 |
| 6             | 1             | 0           | -0.769996               | 1.750004  | -0.242424 |
| 7             | 7             | 0           | 0.985187                | 0.842356  | 0.333861  |
| 8             | 7             | 0           | 1.788004                | -0.053183 | 0.017261  |
| 9             | 7             | 0           | 2.639223                | -0.800978 | -0.189069 |
| 10            | 1             | 0           | -2.977785               | -1.182673 | 0.009624  |
| 11            | 1             | 0           | -3.068686               | 0.392283  | -0.088881 |
| 12            | 8             | 0           | -2.487864               | -0.376600 | -0.239680 |

*gag*<sup>-</sup>, E = -318.383147 a.u.

| Center Number | Atomic Number | Atomic Type | Coordinates (Angstroms) |           |           |
|---------------|---------------|-------------|-------------------------|-----------|-----------|
|               |               |             | X                       | Y         | Z         |
| 1             | 6             | 0           | 1.182077                | -0.263462 | -0.448402 |
| 2             | 1             | 0           | 1.354427                | 0.098567  | -1.458418 |
| 3             | 1             | 0           | 0.824121                | -1.291107 | -0.445830 |
| 4             | 6             | 0           | 0.321791                | 0.691858  | 0.357340  |
| 5             | 1             | 0           | 0.202233                | 0.345324  | 1.388303  |
| 6             | 1             | 0           | 0.771468                | 1.683794  | 0.359025  |
| 7             | 7             | 0           | -0.971305               | 0.812386  | -0.332913 |
| 8             | 7             | 0           | -1.815157               | -0.047209 | -0.026028 |
| 9             | 7             | 0           | -2.700684               | -0.756434 | 0.170646  |
| 10            | 1             | 0           | 2.600045                | -0.778800 | 1.006406  |
| 11            | 1             | 0           | 3.248967                | -0.576687 | -0.422205 |
| 12            | 8             | 0           | 2.548195                | -0.264084 | 0.179645  |

*aga*, E = -318.3907334 a.u.

| Center<br>Number | Atomic<br>Number | Atomic<br>Type | Coordinates (Angstroms) |           |           |
|------------------|------------------|----------------|-------------------------|-----------|-----------|
|                  |                  |                | X                       | Y         | Z         |
| 1                | 6                | 0              | -1.736644               | 0.537030  | -0.159023 |
| 2                | 1                | 0              | -1.922700               | 0.646185  | -1.223765 |
| 3                | 1                | 0              | -2.509064               | 1.017741  | 0.434542  |
| 4                | 6                | 0              | -0.326963               | 0.921801  | 0.230708  |
| 5                | 1                | 0              | -0.105800               | 1.914312  | -0.171170 |
| 6                | 1                | 0              | -0.200656               | 0.924461  | 1.317302  |
| 7                | 7                | 0              | 0.504910                | -0.128246 | -0.395761 |
| 8                | 7                | 0              | 1.703213                | -0.127567 | -0.067610 |
| 9                | 7                | 0              | 2.827652                | -0.214805 | 0.150434  |
| 10               | 1                | 0              | -0.981329               | -1.321382 | -0.118403 |
| 11               | 1                | 0              | -2.136014               | -1.168858 | 0.977925  |
| 12               | 8                | 0              | -1.876652               | -0.933890 | 0.068002  |

*agg*, E = -318.3919006 a.u.

| Center<br>Number | Atomic<br>Number | Atomic<br>Type | Coordinates (Angstroms) |           |           |
|------------------|------------------|----------------|-------------------------|-----------|-----------|
|                  |                  |                | X                       | Y         | Z         |
| 1                | 6                | 0              | -1.733114               | 0.541510  | -0.162755 |
| 2                | 1                | 0              | -1.913159               | 0.592894  | -1.234560 |
| 3                | 1                | 0              | -2.490183               | 1.065109  | 0.413223  |
| 4                | 6                | 0              | -0.321481               | 0.922240  | 0.212195  |
| 5                | 1                | 0              | -0.096449               | 1.907795  | -0.203505 |
| 6                | 1                | 0              | -0.200288               | 0.937691  | 1.299017  |
| 7                | 7                | 0              | 0.507160                | -0.140794 | -0.398234 |
| 8                | 7                | 0              | 1.706015                | -0.133272 | -0.071421 |
| 9                | 7                | 0              | 2.830642                | -0.218368 | 0.146787  |
| 10               | 1                | 0              | -2.593731               | -1.364468 | -0.160447 |
| 11               | 1                | 0              | -0.985450               | -1.319489 | -0.040692 |
| 12               | 8                | 0              | -1.837485               | -0.894375 | 0.236299  |

*agg*<sup>-</sup>, E = -318.3868806 a.u.

| Center<br>Number | Atomic<br>Number | Atomic<br>Type | Coordinates (Angstroms) |           |           |
|------------------|------------------|----------------|-------------------------|-----------|-----------|
|                  |                  |                | X                       | Y         | Z         |
| 1                | 6                | 0              | -1.653350               | 0.589146  | -0.210592 |
| 2                | 1                | 0              | -1.715913               | 0.633151  | -1.294624 |
| 3                | 1                | 0              | -2.358520               | 1.264187  | 0.269191  |
| 4                | 6                | 0              | -0.251684               | 0.769627  | 0.295234  |
| 5                | 1                | 0              | 0.014909                | 1.814602  | 0.096984  |
| 6                | 1                | 0              | -0.200960               | 0.603261  | 1.377726  |
| 7                | 7                | 0              | 0.616400                | -0.161171 | -0.439890 |
| 8                | 7                | 0              | 1.803287                | -0.150838 | -0.081464 |
| 9                | 7                | 0              | 2.926723                | -0.244977 | 0.153025  |
| 10               | 1                | 0              | -2.104913               | -1.010518 | 1.059451  |
| 11               | 1                | 0              | -2.954959               | -1.040739 | -0.273083 |
| 12               | 8                | 0              | -2.084289               | -0.814710 | 0.104351  |

*gga*, E = -318.3894441 a.u.

| Center | Atomic | Atomic | Coordinates (Angstroms) |  |  |
|--------|--------|--------|-------------------------|--|--|
|--------|--------|--------|-------------------------|--|--|

| Number | Number | Type | X         | Y         | Z         |
|--------|--------|------|-----------|-----------|-----------|
| 1      | 6      | 0    | 1.468326  | 0.456055  | 0.576008  |
| 2      | 1      | 0    | 1.113423  | 0.222847  | 1.576427  |
| 3      | 1      | 0    | 2.368770  | 1.064305  | 0.602083  |
| 4      | 6      | 0    | 0.373696  | 0.978791  | -0.334543 |
| 5      | 1      | 0    | -0.139051 | 1.814915  | 0.146241  |
| 6      | 1      | 0    | 0.782292  | 1.304089  | -1.291560 |
| 7      | 7      | 0    | -0.520563 | -0.168859 | -0.616480 |
| 8      | 7      | 0    | -1.624465 | -0.151371 | -0.041873 |
| 9      | 7      | 0    | -2.677672 | -0.237900 | 0.407858  |
| 10     | 1      | 0    | 1.043675  | -1.288233 | -0.313719 |
| 11     | 1      | 0    | 2.518845  | -0.810031 | -0.696607 |
| 12     | 8      | 0    | 1.877352  | -0.876257 | 0.035226  |

**ggg**, E = -318.3903229 a.u.

| Center Number | Atomic Number | Atomic Type | Coordinates (Angstroms) |           |           |
|---------------|---------------|-------------|-------------------------|-----------|-----------|
|               |               |             | X                       | Y         | Z         |
| 1             | 6             | 0           | 1.459322                | 0.418455  | 0.594441  |
| 2             | 1             | 0           | 1.096357                | 0.098336  | 1.569699  |
| 3             | 1             | 0           | 2.350417                | 1.035827  | 0.665535  |
| 4             | 6             | 0           | 0.373055                | 1.011988  | -0.280045 |
| 5             | 1             | 0           | -0.134721               | 1.813670  | 0.259977  |
| 6             | 1             | 0           | 0.796545                | 1.406061  | -1.203772 |
| 7             | 7             | 0           | -0.532737               | -0.096544 | -0.663192 |
| 8             | 7             | 0           | -1.611371               | -0.150800 | -0.043512 |
| 9             | 7             | 0           | -2.646271               | -0.294270 | 0.434162  |
| 10            | 1             | 0           | 2.395365                | -1.438908 | 0.382270  |
| 11            | 1             | 0           | 1.037626                | -1.235129 | -0.466843 |
| 12            | 8             | 0           | 1.874600                | -0.808901 | -0.148181 |

**ggg<sup>-</sup>**, E = -318.3859741 a.u.

| Center Number | Atomic Number | Atomic Type | Coordinates (Angstroms) |           |           |
|---------------|---------------|-------------|-------------------------|-----------|-----------|
|               |               |             | X                       | Y         | Z         |
| 1             | 6             | 0           | 1.264981                | 0.035635  | 0.728898  |
| 2             | 1             | 0           | 0.735627                | -0.734594 | 1.285776  |
| 3             | 1             | 0           | 2.058658                | 0.485418  | 1.322830  |
| 4             | 6             | 0           | 0.349278                | 1.065245  | 0.113047  |
| 5             | 1             | 0           | -0.077540               | 1.643120  | 0.940980  |
| 6             | 1             | 0           | 0.908035                | 1.754212  | -0.520812 |
| 7             | 7             | 0           | -0.687474               | 0.469130  | -0.739823 |
| 8             | 7             | 0           | -1.596996               | -0.112700 | -0.126635 |
| 9             | 7             | 0           | -2.505156               | -0.675364 | 0.304936  |
| 10            | 1             | 0           | 2.476633                | -0.181435 | -0.964053 |
| 11            | 1             | 0           | 2.440589                | -1.489959 | -0.076976 |
| 12            | 8             | 0           | 1.912478                | -0.731188 | -0.388596 |

**g<sup>-</sup>gg<sup>-</sup>**, E = -318.3861194 a.u.

| Center Number | Atomic Number | Atomic Type | Coordinates (Angstroms) |   |   |
|---------------|---------------|-------------|-------------------------|---|---|
|               |               |             | X                       | Y | Z |

|    |   |   |           |           |           |
|----|---|---|-----------|-----------|-----------|
| 1  | 6 | 0 | 1.626041  | -0.234929 | -0.170026 |
| 2  | 1 | 0 | 1.734406  | -0.339714 | -1.246180 |
| 3  | 1 | 0 | 2.572590  | -0.369786 | 0.350032  |
| 4  | 6 | 0 | 0.514127  | -1.092850 | 0.379183  |
| 5  | 1 | 0 | 0.841445  | -2.129401 | 0.278781  |
| 6  | 1 | 0 | 0.344226  | -0.893275 | 1.442160  |
| 7  | 7 | 0 | -0.718652 | -0.956089 | -0.408265 |
| 8  | 7 | 0 | -1.461805 | -0.019992 | -0.073037 |
| 9  | 7 | 0 | -2.254116 | 0.790600  | 0.134173  |
| 10 | 1 | 0 | 1.393921  | 1.555951  | 0.903192  |
| 11 | 1 | 0 | 1.606034  | 1.809142  | -0.644400 |
| 12 | 8 | 0 | 1.213548  | 1.204016  | 0.011421  |

### *N*-(2-Azidoethyl)ethanamide

*aag*, E = -450.5121692 a.u.

| Center Number | Atomic Number | Atomic Type | Coordinates (Angstroms) |           |           |
|---------------|---------------|-------------|-------------------------|-----------|-----------|
|               |               |             | X                       | Y         | Z         |
| 1             | 6             | 0           | 0.129870                | 0.944573  | -0.537833 |
| 2             | 1             | 0           | -0.153334               | 1.997041  | -0.594885 |
| 3             | 1             | 0           | 0.197892                | 0.541686  | -1.550808 |
| 4             | 6             | 0           | -0.913722               | 0.164402  | 0.249464  |
| 5             | 1             | 0           | -0.623020               | -0.888773 | 0.309013  |
| 6             | 1             | 0           | -1.007002               | 0.575923  | 1.260462  |
| 7             | 7             | 0           | -2.197120               | 0.299911  | -0.479473 |
| 8             | 7             | 0           | -3.176767               | -0.191411 | 0.090406  |
| 9             | 7             | 0           | -4.165737               | -0.607648 | 0.517347  |
| 10            | 7             | 0           | 1.431139                | 0.852656  | 0.092520  |
| 11            | 1             | 0           | 1.735619                | 1.595796  | 0.702842  |
| 12            | 6             | 0           | 2.222879                | -0.242067 | -0.061718 |
| 13            | 6             | 0           | 3.544249                | -0.208830 | 0.669786  |
| 14            | 1             | 0           | 3.693560                | 0.707731  | 1.242490  |
| 15            | 1             | 0           | 3.590380                | -1.066796 | 1.343617  |
| 16            | 1             | 0           | 4.348049                | -0.311393 | -0.062127 |
| 17            | 8             | 0           | 1.884700                | -1.196780 | -0.764298 |

*gag*, E = -450.5129271 a.u.

| Center Number | Atomic Number | Atomic Type | Coordinates (Angstroms) |           |           |
|---------------|---------------|-------------|-------------------------|-----------|-----------|
|               |               |             | X                       | Y         | Z         |
| 1             | 6             | 0           | 0.100774                | -0.751188 | -0.678938 |
| 2             | 1             | 0           | 0.362923                | -1.584618 | -1.333356 |
| 3             | 1             | 0           | 0.350260                | 0.184583  | -1.186873 |
| 4             | 6             | 0           | 0.877928                | -0.851793 | 0.633713  |
| 5             | 1             | 0           | 0.577080                | -0.045997 | 1.310388  |
| 6             | 1             | 0           | 0.689016                | -1.811860 | 1.113854  |
| 7             | 7             | 0           | 2.338137                | -0.806394 | 0.393643  |
| 8             | 7             | 0           | 2.773856                | 0.294166  | 0.031990  |
| 9             | 7             | 0           | 3.314979                | 1.259832  | -0.298089 |
| 10            | 7             | 0           | -1.328277               | -0.776287 | -0.442713 |
| 11            | 1             | 0           | -1.827961               | -1.648409 | -0.529200 |

|    |   |   |           |           |           |
|----|---|---|-----------|-----------|-----------|
| 12 | 6 | 0 | -1.994263 | 0.333297  | -0.024129 |
| 13 | 6 | 0 | -3.475654 | 0.164363  | 0.216395  |
| 14 | 1 | 0 | -3.827900 | -0.849474 | 0.020746  |
| 15 | 1 | 0 | -3.691575 | 0.427263  | 1.253972  |
| 16 | 1 | 0 | -4.013289 | 0.863468  | -0.427393 |
| 17 | 8 | 0 | -1.420266 | 1.412220  | 0.137724  |

-----  
*gag*<sup>-</sup>, E = -450.5124298 a.u.  
 -----

| Center<br>Number | Atomic<br>Number | Atomic<br>Type | Coordinates (Angstroms) |           |           |
|------------------|------------------|----------------|-------------------------|-----------|-----------|
|                  |                  |                | X                       | Y         | Z         |
| 1                | 6                | 0              | -0.162369               | -0.352279 | -0.513526 |
| 2                | 1                | 0              | -0.079691               | 0.317241  | -1.372478 |
| 3                | 1                | 0              | -0.738289               | -1.232375 | -0.810190 |
| 4                | 6                | 0              | -0.857920               | 0.381829  | 0.632777  |
| 5                | 1                | 0              | -0.954852               | -0.274812 | 1.504550  |
| 6                | 1                | 0              | -0.282123               | 1.263268  | 0.910558  |
| 7                | 7                | 0              | -2.186722               | 0.885671  | 0.218356  |
| 8                | 7                | 0              | -3.043783               | 0.014818  | 0.025352  |
| 9                | 7                | 0              | -3.938736               | -0.687182 | -0.177846 |
| 10               | 7                | 0              | 1.163612                | -0.788771 | -0.126390 |
| 11               | 1                | 0              | 1.292922                | -1.729789 | 0.213302  |
| 12               | 6                | 0              | 2.216444                | 0.072449  | -0.105782 |
| 13               | 6                | 0              | 3.533470                | -0.506675 | 0.354538  |
| 14               | 1                | 0              | 3.468905                | -1.564423 | 0.614111  |
| 15               | 1                | 0              | 4.267220                | -0.375654 | -0.443414 |
| 16               | 1                | 0              | 3.876574                | 0.057916  | 1.223972  |
| 17               | 8                | 0              | 2.101374                | 1.249366  | -0.453094 |

-----  
*agg*, E = -450.5144087 a.u.  
 -----

| Center<br>Number | Atomic<br>Number | Atomic<br>Type | Coordinates (Angstroms) |           |           |
|------------------|------------------|----------------|-------------------------|-----------|-----------|
|                  |                  |                | X                       | Y         | Z         |
| 1                | 6                | 0              | 0.231273                | -1.454260 | -0.442835 |
| 2                | 1                | 0              | -0.084583               | -1.940365 | -1.368142 |
| 3                | 1                | 0              | 0.778300                | -2.178307 | 0.164672  |
| 4                | 6                | 0              | -0.982003               | -0.979763 | 0.338374  |
| 5                | 1                | 0              | -1.632137               | -1.829211 | 0.575624  |
| 6                | 1                | 0              | -0.662479               | -0.494755 | 1.266076  |
| 7                | 7                | 0              | -1.703644               | -0.009163 | -0.520196 |
| 8                | 7                | 0              | -2.691048               | 0.520026  | 0.000096  |
| 9                | 7                | 0              | -3.628987               | 1.082624  | 0.371096  |
| 10               | 7                | 0              | 1.124300                | -0.364691 | -0.781409 |
| 11               | 1                | 0              | 0.949411                | 0.150029  | -1.631494 |
| 12               | 6                | 0              | 1.956822                | 0.181093  | 0.145215  |
| 13               | 6                | 0              | 2.712073                | 1.413368  | -0.294263 |
| 14               | 1                | 0              | 2.593386                | 1.629024  | -1.357252 |
| 15               | 1                | 0              | 2.350569                | 2.265638  | 0.286354  |
| 16               | 1                | 0              | 3.770545                | 1.274907  | -0.067280 |
| 17               | 8                | 0              | 2.090456                | -0.305144 | 1.270674  |

-----  
*agg*<sup>-</sup>, E = -450.5127234 a.u.  
 -----



| Center<br>Number | Atomic<br>Number | Atomic<br>Type | Coordinates (Angstroms) |           |           |
|------------------|------------------|----------------|-------------------------|-----------|-----------|
|                  |                  |                | X                       | Y         | Z         |
| 1                | 6                | 0              | 0.228111                | 1.571634  | 0.154075  |
| 2                | 1                | 0              | 0.364205                | 1.461829  | 1.230459  |
| 3                | 1                | 0              | 0.399115                | 2.617909  | -0.116054 |
| 4                | 6                | 0              | -1.191625               | 1.193925  | -0.231797 |
| 5                | 1                | 0              | -1.900230               | 1.844085  | 0.293747  |
| 6                | 1                | 0              | -1.338860               | 1.306094  | -1.312499 |
| 7                | 7                | 0              | -1.403358               | -0.219773 | 0.154933  |
| 8                | 7                | 0              | -2.556911               | -0.634175 | 0.006427  |
| 9                | 7                | 0              | -3.591340               | -1.139236 | -0.090395 |
| 10               | 7                | 0              | 1.208471                | 0.728246  | -0.495383 |
| 11               | 1                | 0              | 1.292092                | 0.776918  | -1.500580 |
| 12               | 6                | 0              | 1.891808                | -0.252665 | 0.156978  |
| 13               | 6                | 0              | 2.762692                | -1.122335 | -0.720991 |
| 14               | 1                | 0              | 2.873819                | -0.732555 | -1.734107 |
| 15               | 1                | 0              | 3.745816                | -1.217002 | -0.257321 |
| 16               | 1                | 0              | 2.314015                | -2.117742 | -0.769844 |
| 17               | 8                | 0              | 1.813259                | -0.428541 | 1.373441  |

ggg, E = -450.5140946 a.u.

| Center<br>Number | Atomic<br>Number | Atomic<br>Type | Coordinates (Angstroms) |           |           |
|------------------|------------------|----------------|-------------------------|-----------|-----------|
|                  |                  |                | X                       | Y         | Z         |
| 1                | 6                | 0              | -0.143988               | 0.746113  | 0.910327  |
| 2                | 1                | 0              | -0.834591               | 0.413217  | 1.689688  |
| 3                | 1                | 0              | 0.389598                | 1.625415  | 1.280263  |
| 4                | 6                | 0              | -0.907022               | 1.138302  | -0.350650 |
| 5                | 1                | 0              | -1.588983               | 1.968520  | -0.134727 |
| 6                | 1                | 0              | -0.211281               | 1.441607  | -1.131127 |
| 7                | 7                | 0              | -1.659834               | -0.006942 | -0.916848 |
| 8                | 7                | 0              | -2.609342               | -0.404340 | -0.232140 |
| 9                | 7                | 0              | -3.521843               | -0.869719 | 0.303309  |
| 10               | 7                | 0              | 0.813163                | -0.314976 | 0.671591  |
| 11               | 1                | 0              | 0.525713                | -1.271990 | 0.810072  |
| 12               | 6                | 0              | 1.989572                | -0.072596 | 0.034215  |
| 13               | 6                | 0              | 2.838412                | -1.285315 | -0.266312 |
| 14               | 1                | 0              | 2.459454                | -2.196299 | 0.199422  |
| 15               | 1                | 0              | 2.871062                | -1.424606 | -1.349665 |
| 16               | 1                | 0              | 3.855469                | -1.095271 | 0.080713  |
| 17               | 8                | 0              | 2.339588                | 1.069027  | -0.273938 |

ggg-, E = -450.5147428 a.u.

| Center<br>Number | Atomic<br>Number | Atomic<br>Type | Coordinates (Angstroms) |          |           |
|------------------|------------------|----------------|-------------------------|----------|-----------|
|                  |                  |                | X                       | Y        | Z         |
| 1                | 6                | 0              | 0.139357                | 1.376725 | -0.773022 |
| 2                | 1                | 0              | 0.382416                | 0.643469 | -1.544991 |
| 3                | 1                | 0              | 0.023277                | 2.353392 | -1.251668 |
| 4                | 6                | 0              | 1.267876                | 1.461369 | 0.250964  |
| 5                | 1                | 0              | 2.193031                | 1.782811 | -0.242000 |
| 6                | 1                | 0              | 1.019261                | 2.179139 | 1.033311  |

|    |   |   |           |           |           |
|----|---|---|-----------|-----------|-----------|
| 7  | 7 | 0 | 1.478387  | 0.177719  | 0.956118  |
| 8  | 7 | 0 | 1.928781  | -0.735883 | 0.254721  |
| 9  | 7 | 0 | 2.353721  | -1.667371 | -0.279087 |
| 10 | 7 | 0 | -1.118356 | 0.982620  | -0.175484 |
| 11 | 1 | 0 | -1.636996 | 1.667445  | 0.354611  |
| 12 | 6 | 0 | -1.540513 | -0.311440 | -0.152254 |
| 13 | 6 | 0 | -2.813491 | -0.565295 | 0.621451  |
| 14 | 1 | 0 | -3.330449 | 0.352300  | 0.906917  |
| 15 | 1 | 0 | -3.476092 | -1.183187 | 0.013369  |
| 16 | 1 | 0 | -2.560876 | -1.126936 | 1.524350  |
| 17 | 8 | 0 | -0.928834 | -1.217022 | -0.721326 |

-----  
 **$g^-gg$ , E = -450.5159553 a.u.**  
 -----

| Center<br>Number | Atomic<br>Number | Atomic<br>Type | Coordinates (Angstroms) |           |           |
|------------------|------------------|----------------|-------------------------|-----------|-----------|
|                  |                  |                | X                       | Y         | Z         |
| 1                | 6                | 0              | 0.310342                | -1.572126 | 0.584769  |
| 2                | 1                | 0              | 0.770445                | -1.843663 | 1.536403  |
| 3                | 1                | 0              | -0.231092               | -2.438833 | 0.193549  |
| 4                | 6                | 0              | 1.392554                | -1.178270 | -0.416418 |
| 5                | 1                | 0              | 2.105460                | -1.995166 | -0.532407 |
| 6                | 1                | 0              | 0.948176                | -0.949428 | -1.389053 |
| 7                | 7                | 0              | 2.179701                | -0.021088 | 0.069120  |
| 8                | 7                | 0              | 1.646570                | 1.085202  | -0.077684 |
| 9                | 7                | 0              | 1.289057                | 2.179864  | -0.180557 |
| 10               | 7                | 0              | -0.621060               | -0.489136 | 0.835125  |
| 11               | 1                | 0              | -0.562423               | 0.019698  | 1.704444  |
| 12               | 6                | 0              | -1.550114               | -0.114225 | -0.084975 |
| 13               | 6                | 0              | -2.379674               | 1.092813  | 0.281780  |
| 14               | 1                | 0              | -2.395557               | 1.281335  | 1.356587  |
| 15               | 1                | 0              | -1.955402               | 1.966950  | -0.220846 |
| 16               | 1                | 0              | -3.397358               | 0.948526  | -0.081962 |
| 17               | 8                | 0              | -1.672597               | -0.705309 | -1.159960 |

-----  
 **$g^-gg^-$ , E = -450.5152881 a.u.**  
 -----

| Center<br>Number | Atomic<br>Number | Atomic<br>Type | Coordinates (Angstroms) |           |           |
|------------------|------------------|----------------|-------------------------|-----------|-----------|
|                  |                  |                | X                       | Y         | Z         |
| 1                | 6                | 0              | 0.642199                | -1.625759 | -0.057508 |
| 2                | 1                | 0              | 0.481025                | -1.760339 | 1.012838  |
| 3                | 1                | 0              | 0.738785                | -2.609063 | -0.528037 |
| 4                | 6                | 0              | 1.926804                | -0.836465 | -0.287077 |
| 5                | 1                | 0              | 2.778920                | -1.398365 | 0.097000  |
| 6                | 1                | 0              | 2.080846                | -0.650141 | -1.356412 |
| 7                | 7                | 0              | 1.931536                | 0.442335  | 0.453497  |
| 8                | 7                | 0              | 1.173988                | 1.324313  | 0.033096  |
| 9                | 7                | 0              | 0.551600                | 2.256281  | -0.253134 |
| 10               | 7                | 0              | -0.518177               | -0.942232 | -0.591089 |
| 11               | 1                | 0              | -0.672572               | -0.959638 | -1.588936 |
| 12               | 6                | 0              | -1.427415               | -0.293409 | 0.191391  |
| 13               | 6                | 0              | -2.528835               | 0.414435  | -0.560839 |
| 14               | 1                | 0              | -2.657357               | 0.040282  | -1.578064 |
| 15               | 1                | 0              | -3.462473               | 0.306557  | -0.007906 |

|    |   |   |           |           |           |
|----|---|---|-----------|-----------|-----------|
| 16 | 1 | 0 | -2.277054 | 1.478033  | -0.605839 |
| 17 | 8 | 0 | -1.332408 | -0.245627 | 1.417871  |

**DMSO**

**1,2-Diazidoethane**

*aaa*, E = -406.1998083 a.u.

| Center Number | Atomic Number | Atomic Type | Coordinates (Angstroms) |           |           |
|---------------|---------------|-------------|-------------------------|-----------|-----------|
|               |               |             | X                       | Y         | Z         |
| 1             | 6             | 0           | -0.397019               | 0.645456  | 0.118223  |
| 2             | 1             | 0           | -1.058887               | 0.678661  | 0.989650  |
| 3             | 1             | 0           | -0.995664               | 0.722040  | -0.794703 |
| 4             | 6             | 0           | 0.397019                | -0.645456 | 0.118223  |
| 5             | 1             | 0           | 0.995664                | -0.722040 | -0.794703 |
| 6             | 1             | 0           | 1.058887                | -0.678661 | 0.989650  |
| 7             | 7             | 0           | 0.591534                | 1.743744  | 0.188424  |
| 8             | 7             | 0           | 0.144915                | 2.869392  | -0.056660 |
| 9             | 7             | 0           | -0.144915               | 3.967551  | -0.260947 |
| 10            | 7             | 0           | -0.591534               | -1.743744 | 0.188424  |
| 11            | 7             | 0           | -0.144915               | -2.869392 | -0.056660 |
| 12            | 7             | 0           | 0.144915                | -3.967551 | -0.260947 |

*aag*, E = -406.2001685 a.u.

| Center Number | Atomic Number | Atomic Type | Coordinates (Angstroms) |           |           |
|---------------|---------------|-------------|-------------------------|-----------|-----------|
|               |               |             | X                       | Y         | Z         |
| 1             | 6             | 0           | -0.398810               | 0.003812  | 0.227352  |
| 2             | 1             | 0           | -0.536052               | 0.042531  | 1.312753  |
| 3             | 1             | 0           | -0.103684               | -1.010728 | -0.063588 |
| 4             | 6             | 0           | 0.657820                | 1.012248  | -0.195944 |
| 5             | 1             | 0           | 0.775995                | 1.006552  | -1.284461 |
| 6             | 1             | 0           | 0.374086                | 2.013183  | 0.126660  |
| 7             | 7             | 0           | -1.647082               | 0.382457  | -0.472944 |
| 8             | 7             | 0           | -2.666699               | -0.185193 | -0.065934 |
| 9             | 7             | 0           | -3.686619               | -0.644621 | 0.217623  |
| 10            | 7             | 0           | 1.945077                | 0.724686  | 0.470493  |
| 11            | 7             | 0           | 2.544896                | -0.274783 | 0.053438  |
| 12            | 7             | 0           | 3.215512                | -1.166531 | -0.242648 |

*gag*, E = -406.200656 a.u.

| Center Number | Atomic Number | Atomic Type | Coordinates (Angstroms) |           |           |
|---------------|---------------|-------------|-------------------------|-----------|-----------|
|               |               |             | X                       | Y         | Z         |
| 1             | 6             | 0           | -0.750584               | 0.139708  | -0.702491 |
| 2             | 1             | 0           | -1.028264               | 0.686138  | -1.603127 |
| 3             | 1             | 0           | -1.037248               | 0.730491  | 0.174865  |
| 4             | 6             | 0           | 0.750584                | -0.139708 | -0.702491 |
| 5             | 1             | 0           | 1.037248                | -0.730491 | 0.174865  |
| 6             | 1             | 0           | 1.028264                | -0.686138 | -1.603127 |

|    |   |   |           |           |           |
|----|---|---|-----------|-----------|-----------|
| 7  | 7 | 0 | -1.517379 | -1.123984 | -0.741026 |
| 8  | 7 | 0 | -1.517379 | -1.770474 | 0.315090  |
| 9  | 7 | 0 | -1.613746 | -2.465121 | 1.232108  |
| 10 | 7 | 0 | 1.517379  | 1.123984  | -0.741026 |
| 11 | 7 | 0 | 1.517379  | 1.770474  | 0.315090  |
| 12 | 7 | 0 | 1.613746  | 2.465121  | 1.232108  |

-----  
**gag**, E = -406.200527 a.u.  
 -----

| Center<br>Number | Atomic<br>Number | Atomic<br>Type | Coordinates (Angstroms) |           |           |
|------------------|------------------|----------------|-------------------------|-----------|-----------|
|                  |                  |                | X                       | Y         | Z         |
| 1                | 6                | 0              | 0.365890                | -0.615068 | 0.265311  |
| 2                | 1                | 0              | 0.365962                | -0.621543 | 1.355825  |
| 3                | 1                | 0              | 1.401265                | -0.622543 | -0.090349 |
| 4                | 6                | 0              | -0.365890               | 0.615068  | -0.265311 |
| 5                | 1                | 0              | -0.365962               | 0.621543  | -1.355825 |
| 6                | 1                | 0              | -1.401265               | 0.622543  | 0.090349  |
| 7                | 7                | 0              | -0.335938               | -1.853402 | -0.135080 |
| 8                | 7                | 0              | -0.247843               | -2.143881 | -1.335398 |
| 9                | 7                | 0              | -0.238338               | -2.540005 | -2.419694 |
| 10               | 7                | 0              | 0.335938                | 1.853402  | 0.135080  |
| 11               | 7                | 0              | 0.247843                | 2.143881  | 1.335398  |
| 12               | 7                | 0              | 0.238338                | 2.540005  | 2.419694  |

-----  
**aga**, E = -406.2020134 a.u.  
 -----

| Center<br>Number | Atomic<br>Number | Atomic<br>Type | Coordinates (Angstroms) |           |           |
|------------------|------------------|----------------|-------------------------|-----------|-----------|
|                  |                  |                | X                       | Y         | Z         |
| 1                | 6                | 0              | -0.319365               | -0.683386 | 0.980156  |
| 2                | 1                | 0              | -0.039522               | -1.209715 | 1.898807  |
| 3                | 1                | 0              | -1.409442               | -0.589480 | 0.934032  |
| 4                | 6                | 0              | 0.319365                | 0.683386  | 0.980156  |
| 5                | 1                | 0              | 0.039522                | 1.209715  | 1.898807  |
| 6                | 1                | 0              | 1.409442                | 0.589480  | 0.934032  |
| 7                | 7                | 0              | -0.183842               | 1.419322  | -0.201262 |
| 8                | 7                | 0              | 0.319365                | 2.533048  | -0.380998 |
| 9                | 7                | 0              | 0.183842                | -1.419322 | -0.201262 |
| 10               | 7                | 0              | -0.319365               | -2.533048 | -0.380998 |
| 11               | 7                | 0              | 0.710947                | 3.582076  | -0.662565 |
| 12               | 7                | 0              | -0.710947               | -3.582076 | -0.662565 |

-----  
**agg**, E = -406.2020886 a.u.  
 -----

| Center<br>Number | Atomic<br>Number | Atomic<br>Type | Coordinates (Angstroms) |           |           |
|------------------|------------------|----------------|-------------------------|-----------|-----------|
|                  |                  |                | X                       | Y         | Z         |
| 1                | 6                | 0              | -0.886729               | 1.388764  | 0.083279  |
| 2                | 1                | 0              | -1.529893               | 1.758235  | 0.889216  |
| 3                | 1                | 0              | -0.666863               | 2.209341  | -0.598989 |
| 4                | 6                | 0              | 0.395338                | 0.842173  | 0.678791  |
| 5                | 1                | 0              | 0.868765                | 1.619955  | 1.287849  |
| 6                | 1                | 0              | 0.185853                | -0.023366 | 1.318244  |
| 7                | 7                | 0              | 1.287334                | 0.456627  | -0.436347 |

|    |   |   |           |           |           |
|----|---|---|-----------|-----------|-----------|
| 8  | 7 | 0 | 2.205231  | -0.313775 | -0.135662 |
| 9  | 7 | 0 | -1.608809 | 0.385394  | -0.730265 |
| 10 | 7 | 0 | -1.993840 | -0.614798 | -0.113402 |
| 11 | 7 | 0 | 3.102005  | -1.024828 | 0.013650  |
| 12 | 7 | 0 | -2.407565 | -1.595731 | 0.335064  |

-----  
**agg<sup>-</sup>**, E = -406.2034749 a.u.  
 -----

| Center<br>Number | Atomic<br>Number | Atomic<br>Type | Coordinates (Angstroms) |           |           |
|------------------|------------------|----------------|-------------------------|-----------|-----------|
|                  |                  |                | X                       | Y         | Z         |
| 1                | 6                | 0              | 1.001993                | 1.396135  | 0.262700  |
| 2                | 1                | 0              | 1.364282                | 2.384921  | -0.018778 |
| 3                | 1                | 0              | 1.147077                | 1.256951  | 1.339109  |
| 4                | 6                | 0              | -0.466887               | 1.283776  | -0.089541 |
| 5                | 1                | 0              | -1.027350               | 2.070997  | 0.427164  |
| 6                | 1                | 0              | -0.603419               | 1.385116  | -1.171015 |
| 7                | 7                | 0              | -0.923929               | -0.050954 | 0.360213  |
| 8                | 7                | 0              | -2.075808               | -0.354863 | 0.034770  |
| 9                | 7                | 0              | 1.827389                | 0.435401  | -0.498457 |
| 10               | 7                | 0              | 1.806642                | -0.734791 | -0.096200 |
| 11               | 7                | 0              | -3.132210               | -0.753437 | -0.204867 |
| 12               | 7                | 0              | 1.913456                | -1.852422 | 0.173764  |

-----  
**ggg**, E = -406.2022304 a.u.  
 -----

| Center<br>Number | Atomic<br>Number | Atomic<br>Type | Coordinates (Angstroms) |           |           |
|------------------|------------------|----------------|-------------------------|-----------|-----------|
|                  |                  |                | X                       | Y         | Z         |
| 1                | 6                | 0              | -0.709997               | -0.275023 | 1.033179  |
| 2                | 1                | 0              | -0.852167               | -0.897218 | 1.923903  |
| 3                | 1                | 0              | -1.442379               | 0.532831  | 1.055817  |
| 4                | 6                | 0              | 0.709997                | 0.275023  | 1.033179  |
| 5                | 1                | 0              | 0.852167                | 0.897218  | 1.923903  |
| 6                | 1                | 0              | 1.442379                | -0.532831 | 1.055817  |
| 7                | 7                | 0              | 1.021140                | 1.042771  | -0.191676 |
| 8                | 7                | 0              | 0.297692                | 2.023490  | -0.401470 |
| 9                | 7                | 0              | -1.021140               | -1.042771 | -0.191676 |
| 10               | 7                | 0              | -0.297692               | -2.023490 | -0.401470 |
| 11               | 7                | 0              | -0.297692               | 2.961264  | -0.718110 |
| 12               | 7                | 0              | 0.297692                | -2.961264 | -0.718110 |

-----  
**g<sup>-</sup>gg<sup>-</sup>**, E = -406.2036376 a.u.  
 -----

| Center<br>Number | Atomic<br>Number | Atomic<br>Type | Coordinates (Angstroms) |           |           |
|------------------|------------------|----------------|-------------------------|-----------|-----------|
|                  |                  |                | X                       | Y         | Z         |
| 1                | 6                | 0              | 1.358915                | 1.166081  | 0.054856  |
| 2                | 1                | 0              | 2.024869                | 1.861853  | -0.456878 |
| 3                | 1                | 0              | 1.648858                | 1.100737  | 1.108374  |
| 4                | 6                | 0              | -0.075120               | 1.660652  | -0.068232 |
| 5                | 1                | 0              | -0.151705               | 2.654059  | 0.378079  |
| 6                | 1                | 0              | -0.368414               | 1.714932  | -1.120487 |
| 7                | 7                | 0              | -0.989951               | 0.776695  | 0.689319  |
| 8                | 7                | 0              | -1.651499               | -0.023775 | 0.017928  |

|    |   |   |           |           |           |
|----|---|---|-----------|-----------|-----------|
| 9  | 7 | 0 | 1.547425  | -0.136892 | -0.614421 |
| 10 | 7 | 0 | 1.098692  | -1.124101 | -0.016819 |
| 11 | 7 | 0 | -2.320713 | -0.823633 | -0.477246 |
| 12 | 7 | 0 | 0.765135  | -2.138576 | 0.425691  |

-----  
**ggg**, E = -406.2037057 a.u.  
 -----

| Center<br>Number | Atomic<br>Number | Atomic<br>Type | Coordinates (Angstroms) |           |           |
|------------------|------------------|----------------|-------------------------|-----------|-----------|
|                  |                  |                | X                       | Y         | Z         |
| 1                | 6                | 0              | -0.446056               | 1.490206  | -0.382137 |
| 2                | 1                | 0              | -1.230602               | 2.132936  | 0.032802  |
| 3                | 1                | 0              | -0.019668               | 1.966284  | -1.264277 |
| 4                | 6                | 0              | 0.637135                | 1.262829  | 0.662860  |
| 5                | 1                | 0              | 1.047975                | 2.224924  | 0.970839  |
| 6                | 1                | 0              | 0.229608                | 0.760118  | 1.547984  |
| 7                | 7                | 0              | 1.773792                | 0.494137  | 0.116273  |
| 8                | 7                | 0              | 1.577969                | -0.717771 | -0.041247 |
| 9                | 7                | 0              | -1.019273               | 0.213643  | -0.865342 |
| 10               | 7                | 0              | -1.699141               | -0.409954 | -0.040680 |
| 11               | 7                | 0              | 1.556084                | -1.859842 | -0.213691 |
| 12               | 7                | 0              | -2.357115               | -1.091996 | 0.620160  |

## 2-Azidoethanamine

**aaa**, E = -298.1505049 a.u.  
 -----

| Center<br>Number | Atomic<br>Number | Atomic<br>Type | Coordinates (Angstroms) |           |           |
|------------------|------------------|----------------|-------------------------|-----------|-----------|
|                  |                  |                | X                       | Y         | Z         |
| 1                | 6                | 0              | -1.497112               | 0.746589  | 0.000000  |
| 2                | 1                | 0              | -1.945582               | 0.282881  | 0.882783  |
| 3                | 1                | 0              | -1.945582               | 0.282881  | -0.882783 |
| 4                | 6                | 0              | 0.000000                | 0.463228  | 0.000000  |
| 5                | 1                | 0              | 0.468040                | 0.894980  | -0.892214 |
| 6                | 1                | 0              | 0.468040                | 0.894980  | 0.892214  |
| 7                | 7                | 0              | 0.182133                | -1.011090 | 0.000000  |
| 8                | 7                | 0              | 1.354338                | -1.397524 | 0.000000  |
| 9                | 7                | 0              | 2.402595                | -1.883262 | 0.000000  |
| 10               | 7                | 0              | -1.826918               | 2.169118  | 0.000000  |
| 11               | 1                | 0              | -1.423641               | 2.622342  | 0.814606  |
| 12               | 1                | 0              | -1.423641               | 2.622342  | -0.814606 |

-----  
**aag**, E = -298.1499706 a.u.  
 -----

| Center<br>Number | Atomic<br>Number | Atomic<br>Type | Coordinates (Angstroms) |           |           |
|------------------|------------------|----------------|-------------------------|-----------|-----------|
|                  |                  |                | X                       | Y         | Z         |
| 1                | 6                | 0              | 1.579492                | 0.494280  | -0.044383 |
| 2                | 1                | 0              | 1.585705                | 1.182899  | 0.810774  |
| 3                | 1                | 0              | 1.563214                | 1.093349  | -0.958160 |
| 4                | 6                | 0              | 0.317355                | -0.346765 | 0.018820  |
| 5                | 1                | 0              | 0.223506                | -0.953574 | -0.887409 |
| 6                | 1                | 0              | 0.345556                | -1.010392 | 0.890935  |
| 7                | 7                | 0              | -0.835993               | 0.579343  | 0.140136  |

|    |   |   |           |           |           |
|----|---|---|-----------|-----------|-----------|
| 8  | 7 | 0 | -1.946302 | 0.056148  | 0.010140  |
| 9  | 7 | 0 | -3.036957 | -0.310951 | -0.089950 |
| 10 | 7 | 0 | 2.739639  | -0.397674 | -0.093703 |
| 11 | 1 | 0 | 3.577749  | 0.141992  | -0.285086 |
| 12 | 1 | 0 | 2.880478  | -0.827418 | 0.815962  |

-----  
**gaa**, E = -298.1510172 a.u.  
 -----

| Center<br>Number | Atomic<br>Number | Atomic<br>Type | Coordinates (Angstroms) |           |           |
|------------------|------------------|----------------|-------------------------|-----------|-----------|
|                  |                  |                | X                       | Y         | Z         |
| 1                | 6                | 0              | 1.196792                | -0.351941 | -0.384621 |
| 2                | 1                | 0              | 1.212649                | -0.176292 | -1.463676 |
| 3                | 1                | 0              | 0.678154                | -1.300648 | -0.213478 |
| 4                | 6                | 0              | 0.414317                | 0.778566  | 0.285048  |
| 5                | 1                | 0              | 0.365487                | 0.621857  | 1.369073  |
| 6                | 1                | 0              | 0.891966                | 1.739941  | 0.092044  |
| 7                | 7                | 0              | -0.956466               | 0.903257  | -0.270084 |
| 8                | 7                | 0              | -1.718504               | -0.035026 | -0.012733 |
| 9                | 7                | 0              | -2.535061               | -0.834540 | 0.160267  |
| 10               | 7                | 0              | 2.570817                | -0.486666 | 0.091737  |
| 11               | 1                | 0              | 3.080194                | 0.378109  | -0.064795 |
| 12               | 1                | 0              | 2.579405                | -0.651891 | 1.093954  |

-----  
**gag**, E = -298.1503717 a.u.  
 -----

| Center<br>Number | Atomic<br>Number | Atomic<br>Type | Coordinates (Angstroms) |           |           |
|------------------|------------------|----------------|-------------------------|-----------|-----------|
|                  |                  |                | X                       | Y         | Z         |
| 1                | 6                | 0              | -1.186036               | -0.369651 | 0.326659  |
| 2                | 1                | 0              | -1.158861               | -0.279892 | 1.420579  |
| 3                | 1                | 0              | -0.698781               | -1.311582 | 0.056811  |
| 4                | 6                | 0              | -0.403865               | 0.790628  | -0.275534 |
| 5                | 1                | 0              | -0.345375               | 0.686291  | -1.363947 |
| 6                | 1                | 0              | -0.884886               | 1.740731  | -0.039464 |
| 7                | 7                | 0              | 0.958320                | 0.891703  | 0.302710  |
| 8                | 7                | 0              | 1.719784                | -0.039905 | 0.020252  |
| 9                | 7                | 0              | 2.534345                | -0.837151 | -0.170042 |
| 10               | 7                | 0              | -2.538121               | -0.376231 | -0.235778 |
| 11               | 1                | 0              | -3.020474               | -1.224651 | 0.044088  |
| 12               | 1                | 0              | -3.072514               | 0.394331  | 0.155195  |

-----  
**gag<sup>-</sup>**, E = -298.1503318 a.u.  
 -----

| Center<br>Number | Atomic<br>Number | Atomic<br>Type | Coordinates (Angstroms) |           |           |
|------------------|------------------|----------------|-------------------------|-----------|-----------|
|                  |                  |                | X                       | Y         | Z         |
| 1                | 6                | 0              | 1.205538                | -0.305475 | -0.393276 |
| 2                | 1                | 0              | 1.269345                | -0.095697 | -1.463953 |
| 3                | 1                | 0              | 0.674500                | -1.260044 | -0.270199 |
| 4                | 6                | 0              | 0.402087                | 0.803218  | 0.274217  |
| 5                | 1                | 0              | 0.354540                | 0.646322  | 1.358332  |
| 6                | 1                | 0              | 0.862347                | 1.771344  | 0.080608  |
| 7                | 7                | 0              | -0.970201               | 0.894562  | -0.279869 |
| 8                | 7                | 0              | -1.714082               | -0.055705 | -0.013053 |

|    |   |   |           |           |           |
|----|---|---|-----------|-----------|-----------|
| 9  | 7 | 0 | -2.516371 | -0.867465 | 0.168055  |
| 10 | 7 | 0 | 2.559207  | -0.316173 | 0.164624  |
| 11 | 1 | 0 | 2.537598  | -0.691955 | 1.108304  |
| 12 | 1 | 0 | 3.146057  | -0.942966 | -0.377036 |

-----  
**aga**, E = -298.1520752 a.u.  
 -----

| Center<br>Number | Atomic<br>Number | Atomic<br>Type | Coordinates (Angstroms) |           |           |
|------------------|------------------|----------------|-------------------------|-----------|-----------|
|                  |                  |                | X                       | Y         | Z         |
| 1                | 6                | 0              | -1.758876               | 0.476476  | -0.155329 |
| 2                | 1                | 0              | -1.853232               | 0.680171  | -1.226031 |
| 3                | 1                | 0              | -2.441099               | 1.151363  | 0.369462  |
| 4                | 6                | 0              | -0.340408               | 0.810338  | 0.281344  |
| 5                | 1                | 0              | -0.118667               | 1.868579  | 0.103063  |
| 6                | 1                | 0              | -0.209774               | 0.588928  | 1.346891  |
| 7                | 7                | 0              | 0.583472                | -0.031035 | -0.523002 |
| 8                | 7                | 0              | 1.733978                | -0.124018 | -0.086832 |
| 9                | 7                | 0              | 2.837122                | -0.283886 | 0.216079  |
| 10               | 7                | 0              | -2.174421               | -0.901300 | 0.094551  |
| 11               | 1                | 0              | -1.511545               | -1.533056 | -0.346423 |
| 12               | 1                | 0              | -2.131036               | -1.095198 | 1.091383  |

-----  
**agg**, E = -298.1519595 a.u.  
 -----

| Center<br>Number | Atomic<br>Number | Atomic<br>Type | Coordinates (Angstroms) |           |           |
|------------------|------------------|----------------|-------------------------|-----------|-----------|
|                  |                  |                | X                       | Y         | Z         |
| 1                | 6                | 0              | 1.744344                | 0.489779  | 0.173890  |
| 2                | 1                | 0              | 1.827874                | 0.631554  | 1.260185  |
| 3                | 1                | 0              | 2.410976                | 1.209032  | -0.309903 |
| 4                | 6                | 0              | 0.327616                | 0.812422  | -0.248465 |
| 5                | 1                | 0              | 0.070662                | 1.842931  | 0.017679  |
| 6                | 1                | 0              | 0.218198                | 0.671958  | -1.329053 |
| 7                | 7                | 0              | -0.575685               | -0.124368 | 0.472061  |
| 8                | 7                | 0              | -1.745275               | -0.140410 | 0.079069  |
| 9                | 7                | 0              | -2.862198               | -0.245998 | -0.196023 |
| 10               | 7                | 0              | 2.105162                | -0.857343 | -0.270791 |
| 11               | 1                | 0              | 3.063062                | -1.059987 | -0.000238 |
| 12               | 1                | 0              | 1.523438                | -1.531866 | 0.218561  |

-----  
**agg<sup>-</sup>**, E = -298.1500388 a.u.  
 -----

| Center<br>Number | Atomic<br>Number | Atomic<br>Type | Coordinates (Angstroms) |           |           |
|------------------|------------------|----------------|-------------------------|-----------|-----------|
|                  |                  |                | X                       | Y         | Z         |
| 1                | 6                | 0              | -1.728740               | 0.495806  | -0.161526 |
| 2                | 1                | 0              | -1.772782               | 0.686202  | -1.237251 |
| 3                | 1                | 0              | -2.372420               | 1.235498  | 0.334281  |
| 4                | 6                | 0              | -0.313130               | 0.740879  | 0.319962  |
| 5                | 1                | 0              | -0.073139               | 1.807221  | 0.250949  |
| 6                | 1                | 0              | -0.209226               | 0.423727  | 1.364502  |
| 7                | 7                | 0              | 0.625027                | -0.027633 | -0.536022 |
| 8                | 7                | 0              | 1.772844                | -0.134204 | -0.097230 |
| 9                | 7                | 0              | 2.875693                | -0.304365 | 0.202934  |



|    |   |   |           |           |           |
|----|---|---|-----------|-----------|-----------|
| 10 | 7 | 0 | -2.134279 | -0.888741 | 0.085146  |
| 11 | 1 | 0 | -2.250906 | -1.032880 | 1.084540  |
| 12 | 1 | 0 | -3.045303 | -1.055273 | -0.331429 |

-----  
**gga**, E = -298.1521611 a.u.  
 -----

| Center<br>Number | Atomic<br>Number | Atomic<br>Type | Coordinates (Angstroms) |           |           |
|------------------|------------------|----------------|-------------------------|-----------|-----------|
|                  |                  |                | X                       | Y         | Z         |
| 1                | 6                | 0              | 1.318153                | -0.042831 | 0.679156  |
| 2                | 1                | 0              | 0.708020                | -0.686353 | 1.322003  |
| 3                | 1                | 0              | 2.080517                | 0.416087  | 1.316294  |
| 4                | 6                | 0              | 0.445733                | 1.073931  | 0.112805  |
| 5                | 1                | 0              | 0.027654                | 1.686861  | 0.919929  |
| 6                | 1                | 0              | 1.026419                | 1.713646  | -0.553049 |
| 7                | 7                | 0              | -0.653400               | 0.537330  | -0.732477 |
| 8                | 7                | 0              | -1.528642               | -0.085054 | -0.121236 |
| 9                | 7                | 0              | -2.414112               | -0.678099 | 0.326222  |
| 10               | 7                | 0              | 1.981326                | -0.879711 | -0.317622 |
| 11               | 1                | 0              | 1.287659                | -1.273178 | -0.947384 |
| 12               | 1                | 0              | 2.590211                | -0.304925 | -0.893773 |

-----  
**ggg**, E = -298.1520207 a.u.  
 -----

| Center<br>Number | Atomic<br>Number | Atomic<br>Type | Coordinates (Angstroms) |           |           |
|------------------|------------------|----------------|-------------------------|-----------|-----------|
|                  |                  |                | X                       | Y         | Z         |
| 1                | 6                | 0              | 1.324292                | -0.006375 | 0.660671  |
| 2                | 1                | 0              | 0.724766                | -0.647524 | 1.323921  |
| 3                | 1                | 0              | 2.096613                | 0.466976  | 1.274109  |
| 4                | 6                | 0              | 0.436711                | 1.090093  | 0.099483  |
| 5                | 1                | 0              | 0.014877                | 1.698099  | 0.906720  |
| 6                | 1                | 0              | 1.005486                | 1.729637  | -0.575041 |
| 7                | 7                | 0              | -0.662184               | 0.531035  | -0.734154 |
| 8                | 7                | 0              | -1.522162               | -0.100193 | -0.110054 |
| 9                | 7                | 0              | -2.393688               | -0.703781 | 0.350206  |
| 10               | 7                | 0              | 1.973074                | -0.737378 | -0.428774 |
| 11               | 1                | 0              | 2.561117                | -1.470736 | -0.043743 |
| 12               | 1                | 0              | 1.265847                | -1.206543 | -0.987458 |

-----  
**ggg<sup>-</sup>**, E = -298.1508925 a.u.  
 -----

| Center<br>Number | Atomic<br>Number | Atomic<br>Type | Coordinates (Angstroms) |           |           |
|------------------|------------------|----------------|-------------------------|-----------|-----------|
|                  |                  |                | X                       | Y         | Z         |
| 1                | 6                | 0              | 1.279375                | -0.061800 | 0.638728  |
| 2                | 1                | 0              | 0.664679                | -0.661312 | 1.317972  |
| 3                | 1                | 0              | 2.120242                | 0.332694  | 1.226576  |
| 4                | 6                | 0              | 0.479509                | 1.137225  | 0.155057  |
| 5                | 1                | 0              | 0.181212                | 1.751899  | 1.011333  |
| 6                | 1                | 0              | 1.073939                | 1.752777  | -0.521651 |
| 7                | 7                | 0              | -0.725872               | 0.765513  | -0.628409 |
| 8                | 7                | 0              | -1.461391               | -0.073881 | -0.103585 |
| 9                | 7                | 0              | -2.228046               | -0.853708 | 0.271702  |
| 10               | 7                | 0              | 1.683716                | -0.911639 | -0.481005 |

|    |   |   |          |           |           |
|----|---|---|----------|-----------|-----------|
| 11 | 1 | 0 | 2.327419 | -0.400487 | -1.078890 |
| 12 | 1 | 0 | 2.200360 | -1.712115 | -0.128977 |

-----  
***g<sup>-</sup>ga***, E = -298.1515146 a.u.  
 -----

| Center<br>Number | Atomic<br>Number | Atomic<br>Type | Coordinates (Angstroms) |           |           |
|------------------|------------------|----------------|-------------------------|-----------|-----------|
|                  |                  |                | X                       | Y         | Z         |
| 1                | 6                | 0              | 1.686123                | -0.129234 | -0.120367 |
| 2                | 1                | 0              | 1.913813                | -0.375549 | -1.161016 |
| 3                | 1                | 0              | 2.577465                | -0.354101 | 0.474785  |
| 4                | 6                | 0              | 0.568648                | -1.047698 | 0.369814  |
| 5                | 1                | 0              | 0.869974                | -2.091728 | 0.266614  |
| 6                | 1                | 0              | 0.339528                | -0.849515 | 1.423240  |
| 7                | 7                | 0              | -0.661680               | -0.901814 | -0.448110 |
| 8                | 7                | 0              | -1.456620               | -0.031773 | -0.078071 |
| 9                | 7                | 0              | -2.298523               | 0.718587  | 0.174991  |
| 10               | 7                | 0              | 1.414229                | 1.301991  | -0.038771 |
| 11               | 1                | 0              | 0.664075                | 1.562459  | -0.670331 |
| 12               | 1                | 0              | 1.124682                | 1.561086  | 0.899756  |

-----  
***g<sup>-</sup>gg***, E = -298.1515858 a.u.  
 -----

| Center<br>Number | Atomic<br>Number | Atomic<br>Type | Coordinates (Angstroms) |           |           |
|------------------|------------------|----------------|-------------------------|-----------|-----------|
|                  |                  |                | X                       | Y         | Z         |
| 1                | 6                | 0              | 1.671843                | -0.124415 | -0.098542 |
| 2                | 1                | 0              | 1.957765                | -0.365052 | -1.130478 |
| 3                | 1                | 0              | 2.541809                | -0.301771 | 0.540757  |
| 4                | 6                | 0              | 0.574926                | -1.077721 | 0.345783  |
| 5                | 1                | 0              | 0.881010                | -2.112484 | 0.186196  |
| 6                | 1                | 0              | 0.346501                | -0.928365 | 1.406119  |
| 7                | 7                | 0              | -0.656814               | -0.896747 | -0.464463 |
| 8                | 7                | 0              | -1.439936               | -0.026536 | -0.070157 |
| 9                | 7                | 0              | -2.272105               | 0.728853  | 0.198788  |
| 10               | 7                | 0              | 1.235627                | 1.264335  | 0.072995  |
| 11               | 1                | 0              | 2.044071                | 1.878033  | 0.081247  |
| 12               | 1                | 0              | 0.680831                | 1.553122  | -0.727424 |

-----  
***g<sup>-</sup>gg<sup>-</sup>***, E = -298.1523262 a.u.  
 -----

| Center<br>Number | Atomic<br>Number | Atomic<br>Type | Coordinates (Angstroms) |           |           |
|------------------|------------------|----------------|-------------------------|-----------|-----------|
|                  |                  |                | X                       | Y         | Z         |
| 1                | 6                | 0              | 1.619902                | -0.116340 | -0.210454 |
| 2                | 1                | 0              | 1.688531                | -0.280182 | -1.288971 |
| 3                | 1                | 0              | 2.594433                | -0.367290 | 0.232473  |
| 4                | 6                | 0              | 0.590597                | -1.076832 | 0.362626  |
| 5                | 1                | 0              | 0.922816                | -2.106826 | 0.229857  |
| 6                | 1                | 0              | 0.447260                | -0.894042 | 1.434557  |
| 7                | 7                | 0              | -0.709257               | -0.990683 | -0.340162 |
| 8                | 7                | 0              | -1.423409               | -0.019871 | -0.071091 |
| 9                | 7                | 0              | -2.217224               | 0.802513  | 0.098974  |
| 10               | 7                | 0              | 1.201528                | 1.266443  | 0.021853  |
| 11               | 1                | 0              | 1.318062                | 1.497884  | 1.004744  |

12 1 0 1.804441 1.900669 -0.492709

## 2-Azidoethylammonium ion

*aa*, E = -298.5975656 a.u.

| Center Number | Atomic Number | Atomic Type | Coordinates (Angstroms) |           |           |
|---------------|---------------|-------------|-------------------------|-----------|-----------|
|               |               |             | X                       | Y         | Z         |
| 1             | 6             | 0           | 1.479848                | 0.533672  | -0.048601 |
| 2             | 1             | 0           | 1.544728                | 1.231815  | 0.784550  |
| 3             | 1             | 0           | 1.482745                | 1.079954  | -0.990256 |
| 4             | 6             | 0           | 0.247909                | -0.345555 | 0.069243  |
| 5             | 1             | 0           | 0.184702                | -1.032722 | -0.781449 |
| 6             | 1             | 0           | 0.270736                | -0.923294 | 0.999784  |
| 7             | 7             | 0           | -0.893123               | 0.588367  | 0.072141  |
| 8             | 7             | 0           | -2.004695               | 0.048445  | -0.001588 |
| 9             | 7             | 0           | -3.094369               | -0.321278 | -0.064691 |
| 10            | 7             | 0           | 2.715423                | -0.306920 | -0.019556 |
| 11            | 1             | 0           | 2.808903                | -0.817765 | 0.861501  |
| 12            | 1             | 0           | 2.724196                | -0.995014 | -0.776295 |
| 13            | 1             | 0           | 3.554788                | 0.268029  | -0.125834 |

*ag*, E = -298.5974339 a.u.

| Center Number | Atomic Number | Atomic Type | Coordinates (Angstroms) |           |           |
|---------------|---------------|-------------|-------------------------|-----------|-----------|
|               |               |             | X                       | Y         | Z         |
| 1             | 6             | 0           | 1.149794                | -0.311983 | -0.404076 |
| 2             | 1             | 0           | 1.232310                | -0.094664 | -1.467893 |
| 3             | 1             | 0           | 0.728216                | -1.307002 | -0.264482 |
| 4             | 6             | 0           | 0.320748                | 0.753817  | 0.303659  |
| 5             | 1             | 0           | 0.229744                | 0.535486  | 1.372957  |
| 6             | 1             | 0           | 0.775781                | 1.736942  | 0.181526  |
| 7             | 7             | 0           | -1.005702               | 0.847832  | -0.329882 |
| 8             | 7             | 0           | -1.804310               | -0.048914 | -0.018082 |
| 9             | 7             | 0           | -2.652876               | -0.801610 | 0.187402  |
| 10            | 7             | 0           | 2.539811                | -0.346655 | 0.149948  |
| 11            | 1             | 0           | 3.026102                | 0.542630  | 0.009061  |
| 12            | 1             | 0           | 2.547288                | -0.548129 | 1.153023  |
| 13            | 1             | 0           | 3.098839                | -1.070845 | -0.307391 |

*ga*, E = -298.6022925 a.u.

| Center Number | Atomic Number | Atomic Type | Coordinates (Angstroms) |           |           |
|---------------|---------------|-------------|-------------------------|-----------|-----------|
|               |               |             | X                       | Y         | Z         |
| 1             | 6             | 0           | -1.682447               | 0.582742  | -0.197037 |
| 2             | 1             | 0           | -1.780118               | 0.684960  | -1.276811 |
| 3             | 1             | 0           | -2.388976               | 1.242682  | 0.303676  |
| 4             | 6             | 0           | -0.265093               | 0.856834  | 0.253787  |
| 5             | 1             | 0           | 0.013732                | 1.867751  | -0.057187 |
| 6             | 1             | 0           | -0.178980               | 0.779533  | 1.343070  |
| 7             | 7             | 0           | 0.580610                | -0.158750 | -0.409441 |
| 8             | 7             | 0           | 1.772032                | -0.152655 | -0.073603 |

|    |   |   |           |           |           |
|----|---|---|-----------|-----------|-----------|
| 9  | 7 | 0 | 2.897711  | -0.245746 | 0.152062  |
| 10 | 7 | 0 | -2.048405 | -0.826146 | 0.141713  |
| 11 | 1 | 0 | -1.350456 | -1.469781 | -0.244273 |
| 12 | 1 | 0 | -2.080632 | -0.977323 | 1.152610  |
| 13 | 1 | 0 | -2.962959 | -1.082206 | -0.236699 |

-----  
**gg**, E = -298.6013585 a.u.  
 -----

| Center<br>Number | Atomic<br>Number | Atomic<br>Type | Coordinates (Angstroms) |           |           |
|------------------|------------------|----------------|-------------------------|-----------|-----------|
|                  |                  |                | X                       | Y         | Z         |
| 1                | 6                | 0              | 1.302012                | 0.156151  | 0.718296  |
| 2                | 1                | 0              | 0.779983                | -0.470499 | 1.441148  |
| 3                | 1                | 0              | 2.090218                | 0.714400  | 1.222530  |
| 4                | 6                | 0              | 0.347045                | 1.087752  | -0.008123 |
| 5                | 1                | 0              | -0.127701               | 1.750106  | 0.720935  |
| 6                | 1                | 0              | 0.877898                | 1.698112  | -0.739431 |
| 7                | 7                | 0              | -0.653529               | 0.316343  | -0.777649 |
| 8                | 7                | 0              | -1.598258               | -0.130981 | -0.108062 |
| 9                | 7                | 0              | -2.533896               | -0.589804 | 0.384233  |
| 10               | 7                | 0              | 1.951612                | -0.763722 | -0.265484 |
| 11               | 1                | 0              | 1.241986                | -1.241129 | -0.829633 |
| 12               | 1                | 0              | 2.566259                | -0.259188 | -0.908434 |
| 13               | 1                | 0              | 2.515512                | -1.478070 | 0.200584  |

## 2-Azidoethanol

-----  
**aaa**, E = -318.0015734 a.u.  
 -----

| Center<br>Number | Atomic<br>Number | Atomic<br>Type | Coordinates (Angstroms) |           |           |
|------------------|------------------|----------------|-------------------------|-----------|-----------|
|                  |                  |                | X                       | Y         | Z         |
| 1                | 6                | 0              | -1.583464               | 0.475397  | -0.081927 |
| 2                | 1                | 0              | -1.556130               | 0.977282  | -1.054349 |
| 3                | 1                | 0              | -1.629015               | 1.233343  | 0.707635  |
| 4                | 6                | 0              | -0.332902               | -0.360837 | 0.095709  |
| 5                | 1                | 0              | -0.389854               | -0.922959 | 1.033426  |
| 6                | 1                | 0              | -0.223901               | -1.060279 | -0.738974 |
| 7                | 7                | 0              | 0.811143                | 0.578585  | 0.138776  |
| 8                | 7                | 0              | 1.923573                | 0.061670  | -0.000101 |
| 9                | 7                | 0              | 3.015360                | -0.296284 | -0.112786 |
| 10               | 1                | 0              | -3.475586               | 0.067387  | -0.237789 |
| 11               | 8                | 0              | -2.684731               | -0.423741 | 0.003267  |

-----  
**aag**, E = -318.001886 a.u.  
 -----

| Center<br>Number | Atomic<br>Number | Atomic<br>Type | Coordinates (Angstroms) |           |           |
|------------------|------------------|----------------|-------------------------|-----------|-----------|
|                  |                  |                | X                       | Y         | Z         |
| 1                | 6                | 0              | -1.592887               | 0.492077  | -0.051282 |
| 2                | 1                | 0              | -1.567721               | 1.073514  | -0.973813 |
| 3                | 1                | 0              | -1.644685               | 1.182608  | 0.797229  |
| 4                | 6                | 0              | -0.335552               | -0.354958 | 0.055909  |
| 5                | 1                | 0              | -0.366419               | -0.972568 | 0.960611  |
| 6                | 1                | 0              | -0.248638               | -1.005837 | -0.819864 |

|    |   |   |           |           |           |
|----|---|---|-----------|-----------|-----------|
| 7  | 7 | 0 | 0.812204  | 0.579481  | 0.127270  |
| 8  | 7 | 0 | 1.924066  | 0.056722  | 0.005468  |
| 9  | 7 | 0 | 3.015404  | -0.307290 | -0.091916 |
| 10 | 1 | 0 | -2.844333 | -0.778329 | 0.720791  |
| 11 | 8 | 0 | -2.752411 | -0.328061 | -0.124808 |

-----  
***gaa***, E = -318.0019064 a.u.  
 -----

| Center<br>Number | Atomic<br>Number | Atomic<br>Type | Coordinates (Angstroms) |           |           |
|------------------|------------------|----------------|-------------------------|-----------|-----------|
|                  |                  |                | X                       | Y         | Z         |
| 1                | 6                | 0              | -1.221853               | -0.345576 | 0.360241  |
| 2                | 1                | 0              | -1.289850               | -0.176060 | 1.439805  |
| 3                | 1                | 0              | -0.722178               | -1.305804 | 0.184385  |
| 4                | 6                | 0              | -0.420663               | 0.779266  | -0.273661 |
| 5                | 1                | 0              | -0.349272               | 0.634281  | -1.356581 |
| 6                | 1                | 0              | -0.896296               | 1.738721  | -0.073862 |
| 7                | 7                | 0              | 0.929507                | 0.868341  | 0.325965  |
| 8                | 7                | 0              | 1.707310                | -0.043332 | 0.019725  |
| 9                | 7                | 0              | 2.538838                | -0.816993 | -0.189665 |
| 10               | 1                | 0              | -3.055114               | -0.967870 | 0.206172  |
| 11               | 8                | 0              | -2.507722               | -0.322690 | -0.251447 |

-----  
***gag***, E = -318.0021934 a.u.  
 -----

| Center<br>Number | Atomic<br>Number | Atomic<br>Type | Coordinates (Angstroms) |           |           |
|------------------|------------------|----------------|-------------------------|-----------|-----------|
|                  |                  |                | X                       | Y         | Z         |
| 1                | 6                | 0              | 1.224570                | -0.336433 | -0.390675 |
| 2                | 1                | 0              | 1.287214                | -0.129588 | -1.459974 |
| 3                | 1                | 0              | 0.724336                | -1.302147 | -0.251881 |
| 4                | 6                | 0              | 0.427428                | 0.769171  | 0.293139  |
| 5                | 1                | 0              | 0.362555                | 0.589485  | 1.372473  |
| 6                | 1                | 0              | 0.906292                | 1.733155  | 0.124990  |
| 7                | 7                | 0              | -0.929078               | 0.884914  | -0.288410 |
| 8                | 7                | 0              | -1.705952               | -0.038273 | -0.015937 |
| 9                | 7                | 0              | -2.537885               | -0.818406 | 0.167158  |
| 10               | 1                | 0              | 2.527186                | -0.652153 | 1.015366  |
| 11               | 8                | 0              | 2.561355                | -0.379103 | 0.093071  |

-----  
***gag<sup>-</sup>***, E = -318.0021896 a.u.  
 -----

| Center<br>Number | Atomic<br>Number | Atomic<br>Type | Coordinates (Angstroms) |           |           |
|------------------|------------------|----------------|-------------------------|-----------|-----------|
|                  |                  |                | X                       | Y         | Z         |
| 1                | 6                | 0              | -1.214565               | -0.369863 | 0.357938  |
| 2                | 1                | 0              | -1.259795               | -0.212061 | 1.440644  |
| 3                | 1                | 0              | -0.718620               | -1.324230 | 0.167442  |
| 4                | 6                | 0              | -0.428243               | 0.765037  | -0.289729 |
| 5                | 1                | 0              | -0.360316               | 0.609850  | -1.371382 |
| 6                | 1                | 0              | -0.913159               | 1.723511  | -0.101207 |
| 7                | 7                | 0              | 0.922620                | 0.883075  | 0.305414  |
| 8                | 7                | 0              | 1.708049                | -0.028953 | 0.020530  |
| 9                | 7                | 0              | 2.545650                | -0.800703 | -0.171968 |
| 10               | 1                | 0              | -3.007435               | 0.306570  | 0.043201  |

11 8 0 -2.514758 -0.481077 -0.208224

-----  
**aga**, E = -318.0032008 a.u.  
-----

| Center<br>Number | Atomic<br>Number | Atomic<br>Type | Coordinates (Angstroms) |           |           |
|------------------|------------------|----------------|-------------------------|-----------|-----------|
|                  |                  |                | X                       | Y         | Z         |
| 1                | 6                | 0              | 1.737259                | 0.464462  | 0.192121  |
| 2                | 1                | 0              | 1.779406                | 0.546568  | 1.283386  |
| 3                | 1                | 0              | 2.397744                | 1.221403  | -0.245713 |
| 4                | 6                | 0              | 0.330455                | 0.737249  | -0.277527 |
| 5                | 1                | 0              | 0.079830                | 1.787234  | -0.092572 |
| 6                | 1                | 0              | 0.251511                | 0.530592  | -1.350260 |
| 7                | 7                | 0              | -0.595570               | -0.138658 | 0.480622  |
| 8                | 7                | 0              | -1.764426               | -0.137503 | 0.084812  |
| 9                | 7                | 0              | -2.883807               | -0.224552 | -0.186433 |
| 10               | 1                | 0              | 2.953053                | -1.050127 | 0.165870  |
| 11               | 8                | 0              | 2.104849                | -0.842618 | -0.237660 |

-----  
**agg**, E = -318.003035 a.u.  
-----

| Center<br>Number | Atomic<br>Number | Atomic<br>Type | Coordinates (Angstroms) |           |           |
|------------------|------------------|----------------|-------------------------|-----------|-----------|
|                  |                  |                | X                       | Y         | Z         |
| 1                | 6                | 0              | -1.751667               | 0.456984  | -0.166871 |
| 2                | 1                | 0              | -1.821342               | 0.623548  | -1.243161 |
| 3                | 1                | 0              | -2.427756               | 1.155997  | 0.338520  |
| 4                | 6                | 0              | -0.339863               | 0.743089  | 0.300219  |
| 5                | 1                | 0              | -0.122557               | 1.809592  | 0.171760  |
| 6                | 1                | 0              | -0.229821               | 0.486140  | 1.360283  |
| 7                | 7                | 0              | 0.597086                | -0.062221 | -0.517528 |
| 8                | 7                | 0              | 1.753108                | -0.123990 | -0.089915 |
| 9                | 7                | 0              | 2.862495                | -0.258028 | 0.201893  |
| 10               | 1                | 0              | -2.145225               | -1.041417 | 1.001897  |
| 11               | 8                | 0              | -2.149118               | -0.890578 | 0.051182  |

-----  
**agg<sup>-</sup>**, E = -318.0050563 a.u.  
-----

| Center<br>Number | Atomic<br>Number | Atomic<br>Type | Coordinates (Angstroms) |           |           |
|------------------|------------------|----------------|-------------------------|-----------|-----------|
|                  |                  |                | X                       | Y         | Z         |
| 1                | 6                | 0              | 1.773073                | 0.426201  | 0.146323  |
| 2                | 1                | 0              | 1.898276                | 0.574407  | 1.224958  |
| 3                | 1                | 0              | 2.489876                | 1.057845  | -0.380867 |
| 4                | 6                | 0              | 0.369518                | 0.823198  | -0.257215 |
| 5                | 1                | 0              | 0.186211                | 1.876913  | -0.022484 |
| 6                | 1                | 0              | 0.226207                | 0.652085  | -1.328872 |
| 7                | 7                | 0              | -0.556810               | -0.037083 | 0.522661  |
| 8                | 7                | 0              | -1.709076               | -0.112569 | 0.085079  |
| 9                | 7                | 0              | -2.812750               | -0.258753 | -0.219437 |
| 10               | 1                | 0              | 1.385286                | -1.460999 | 0.198702  |
| 11               | 8                | 0              | 2.063631                | -0.917226 | -0.218025 |

-----  
**gga**, E = -318.0032189 a.u.  
-----

| Center<br>Number | Atomic<br>Number | Atomic<br>Type | Coordinates (Angstroms) |           |           |
|------------------|------------------|----------------|-------------------------|-----------|-----------|
|                  |                  |                | X                       | Y         | Z         |
| 1                | 6                | 0              | 1.309438                | -0.112546 | 0.630142  |
| 2                | 1                | 0              | 0.694149                | -0.838034 | 1.175976  |
| 3                | 1                | 0              | 2.081264                | 0.265158  | 1.311252  |
| 4                | 6                | 0              | 0.459289                | 1.058412  | 0.185967  |
| 5                | 1                | 0              | 0.093616                | 1.600683  | 1.064729  |
| 6                | 1                | 0              | 1.048478                | 1.738389  | -0.428870 |
| 7                | 7                | 0              | -0.682746               | 0.649408  | -0.667472 |
| 8                | 7                | 0              | -1.516271               | -0.076487 | -0.116235 |
| 9                | 7                | 0              | -2.365939               | -0.754912 | 0.275021  |
| 10               | 1                | 0              | 2.314470                | -1.522196 | -0.247930 |
| 11               | 8                | 0              | 1.888794                | -0.705658 | -0.526377 |

**ggg**, E = -318.003423 a.u.

| Center<br>Number | Atomic<br>Number | Atomic<br>Type | Coordinates (Angstroms) |           |           |
|------------------|------------------|----------------|-------------------------|-----------|-----------|
|                  |                  |                | X                       | Y         | Z         |
| 1                | 6                | 0              | 1.303787                | -0.125881 | 0.635960  |
| 2                | 1                | 0              | 0.687345                | -0.787039 | 1.249823  |
| 3                | 1                | 0              | 2.133264                | 0.236223  | 1.254917  |
| 4                | 6                | 0              | 0.493998                | 1.076636  | 0.180072  |
| 5                | 1                | 0              | 0.165431                | 1.647524  | 1.056377  |
| 6                | 1                | 0              | 1.095235                | 1.729041  | -0.454221 |
| 7                | 7                | 0              | -0.675128               | 0.703646  | -0.650986 |
| 8                | 7                | 0              | -1.486507               | -0.056171 | -0.112872 |
| 9                | 7                | 0              | -2.320247               | -0.759287 | 0.269156  |
| 10               | 1                | 0              | 2.342292                | -0.368674 | -0.985717 |
| 11               | 8                | 0              | 1.770363                | -0.922364 | -0.444307 |

**ggg<sup>-</sup>**, E = -318.004656 a.u.

| Center<br>Number | Atomic<br>Number | Atomic<br>Type | Coordinates (Angstroms) |           |           |
|------------------|------------------|----------------|-------------------------|-----------|-----------|
|                  |                  |                | X                       | Y         | Z         |
| 1                | 6                | 0              | 1.348429                | -0.054535 | 0.658535  |
| 2                | 1                | 0              | 0.755796                | -0.717189 | 1.301889  |
| 3                | 1                | 0              | 2.141525                | 0.391208  | 1.262296  |
| 4                | 6                | 0              | 0.467505                | 1.048761  | 0.101176  |
| 5                | 1                | 0              | 0.050289                | 1.655233  | 0.912471  |
| 6                | 1                | 0              | 1.043303                | 1.686473  | -0.568898 |
| 7                | 7                | 0              | -0.622828               | 0.486851  | -0.738376 |
| 8                | 7                | 0              | -1.525418               | -0.081822 | -0.111405 |
| 9                | 7                | 0              | -2.435223               | -0.624159 | 0.349095  |
| 10               | 1                | 0              | 1.292172                | -1.115663 | -0.957647 |
| 11               | 8                | 0              | 1.988200                | -0.791439 | -0.375447 |

**g<sup>-</sup>ga**, E = -318.0051413 a.u.

| Center<br>Number | Atomic<br>Number | Atomic<br>Type | Coordinates (Angstroms) |           |           |
|------------------|------------------|----------------|-------------------------|-----------|-----------|
|                  |                  |                | X                       | Y         | Z         |
| 1                | 6                | 0              | 1.609075                | -0.020125 | -0.201281 |

|    |   |   |           |           |           |
|----|---|---|-----------|-----------|-----------|
| 2  | 1 | 0 | 1.699090  | -0.141157 | -1.285814 |
| 3  | 1 | 0 | 2.592124  | -0.169347 | 0.260591  |
| 4  | 6 | 0 | 0.652912  | -1.056826 | 0.345402  |
| 5  | 1 | 0 | 1.048674  | -2.056343 | 0.165799  |
| 6  | 1 | 0 | 0.518679  | -0.916178 | 1.423537  |
| 7  | 7 | 0 | -0.657320 | -1.017930 | -0.340725 |
| 8  | 7 | 0 | -1.388390 | -0.059729 | -0.066330 |
| 9  | 7 | 0 | -2.189338 | 0.754797  | 0.104332  |
| 10 | 1 | 0 | 1.621974  | 1.923285  | -0.306104 |
| 11 | 8 | 0 | 1.074109  | 1.260186  | 0.124542  |

-----  
***g<sup>-</sup>gg***, E = -318.0049439 a.u.  
 -----

| Center<br>Number | Atomic<br>Number | Atomic<br>Type | Coordinates (Angstroms) |           |           |
|------------------|------------------|----------------|-------------------------|-----------|-----------|
|                  |                  |                | X                       | Y         | Z         |
| 1                | 6                | 0              | 1.602330                | -0.010066 | -0.231533 |
| 2                | 1                | 0              | 1.664918                | -0.149653 | -1.311870 |
| 3                | 1                | 0              | 2.600275                | -0.143304 | 0.201862  |
| 4                | 6                | 0              | 0.662613                | -1.045997 | 0.360046  |
| 5                | 1                | 0              | 1.064503                | -2.047405 | 0.200918  |
| 6                | 1                | 0              | 0.539562                | -0.884655 | 1.437536  |
| 7                | 7                | 0              | -0.657027               | -1.034980 | -0.306601 |
| 8                | 7                | 0              | -1.386596               | -0.067715 | -0.061656 |
| 9                | 7                | 0              | -2.188856               | 0.749975  | 0.088711  |
| 10               | 1                | 0              | 1.206946                | 1.514281  | 0.906632  |
| 11               | 8                | 0              | 1.120187                | 1.314518  | -0.031168 |

-----  
***g<sup>-</sup>gg<sup>-</sup>***, E = -318.0051412 a.u.  
 -----

| Center<br>Number | Atomic<br>Number | Atomic<br>Type | Coordinates (Angstroms) |           |           |
|------------------|------------------|----------------|-------------------------|-----------|-----------|
|                  |                  |                | X                       | Y         | Z         |
| 1                | 6                | 0              | 1.609083                | -0.020271 | -0.201602 |
| 2                | 1                | 0              | 1.698329                | -0.141214 | -1.286249 |
| 3                | 1                | 0              | 2.592423                | -0.169760 | 0.259517  |
| 4                | 6                | 0              | 0.652870                | -1.056719 | 0.345493  |
| 5                | 1                | 0              | 1.048361                | -2.056308 | 0.165793  |
| 6                | 1                | 0              | 0.518860                | -0.916019 | 1.423645  |
| 7                | 7                | 0              | -0.657422               | -1.017860 | -0.340504 |
| 8                | 7                | 0              | -1.388558               | -0.059594 | -0.066296 |
| 9                | 7                | 0              | -2.189665               | 0.754855  | 0.104116  |
| 10               | 1                | 0              | 1.621930                | 1.923071  | -0.306683 |
| 11               | 8                | 0              | 1.074737                | 1.260045  | 0.124927  |

### Protonated 2-azidoethanol

-----  
***aaa***, E = -318.3939478 a.u.  
 -----

| Center<br>Number | Atomic<br>Number | Atomic<br>Type | Coordinates (Angstroms) |          |           |
|------------------|------------------|----------------|-------------------------|----------|-----------|
|                  |                  |                | X                       | Y        | Z         |
| 1                | 6                | 0              | -1.461508               | 0.535300 | 0.101344  |
| 2                | 1                | 0              | -1.572454               | 1.285331 | -0.676855 |



|    |   |   |           |           |           |
|----|---|---|-----------|-----------|-----------|
| 3  | 1 | 0 | -1.476918 | 0.989578  | 1.088005  |
| 4  | 6 | 0 | -0.262334 | -0.363998 | -0.121930 |
| 5  | 1 | 0 | -0.167059 | -1.091747 | 0.689240  |
| 6  | 1 | 0 | -0.344251 | -0.886620 | -1.079930 |
| 7  | 7 | 0 | 0.873659  | 0.574217  | -0.138397 |
| 8  | 7 | 0 | 1.984965  | 0.045478  | 0.000259  |
| 9  | 7 | 0 | 3.073234  | -0.312889 | 0.115759  |
| 10 | 1 | 0 | -2.895095 | -0.680573 | -0.814334 |
| 11 | 1 | 0 | -2.847060 | -0.887504 | 0.758015  |
| 12 | 8 | 0 | -2.734640 | -0.237990 | 0.039504  |

-----  
**aag**, E = -318.3943164 a.u.  
 -----

| Center<br>Number | Atomic<br>Number | Atomic<br>Type | Coordinates (Angstroms) |           |           |
|------------------|------------------|----------------|-------------------------|-----------|-----------|
|                  |                  |                | X                       | Y         | Z         |
| 1                | 6                | 0              | -1.456132               | 0.530579  | 0.083295  |
| 2                | 1                | 0              | -1.572214               | 1.248670  | -0.724829 |
| 3                | 1                | 0              | -1.467507               | 1.012513  | 1.056365  |
| 4                | 6                | 0              | -0.259652               | -0.377451 | -0.098126 |
| 5                | 1                | 0              | -0.153702               | -1.037376 | 0.766872  |
| 6                | 1                | 0              | -0.359257               | -0.976342 | -1.008880 |
| 7                | 7                | 0              | 0.874883                | 0.555054  | -0.215949 |
| 8                | 7                | 0              | 1.985775                | 0.049824  | -0.005985 |
| 9                | 7                | 0              | 3.073660                | -0.288882 | 0.161051  |
| 10               | 1                | 0              | -3.448307               | 0.084072  | 0.483750  |
| 11               | 1                | 0              | -2.912566               | -0.681921 | -0.791179 |
| 12               | 8                | 0              | -2.666495               | -0.347544 | 0.091633  |

-----  
**gaa**, E = -318.394104 a.u.  
 -----

| Center<br>Number | Atomic<br>Number | Atomic<br>Type | Coordinates (Angstroms) |           |           |
|------------------|------------------|----------------|-------------------------|-----------|-----------|
|                  |                  |                | X                       | Y         | Z         |
| 1                | 6                | 0              | 1.171202                | -0.267550 | -0.453693 |
| 2                | 1                | 0              | 1.333510                | 0.073350  | -1.472341 |
| 3                | 1                | 0              | 0.788062                | -1.285092 | -0.439635 |
| 4                | 6                | 0              | 0.331467                | 0.703087  | 0.360906  |
| 5                | 1                | 0              | 0.217795                | 0.361112  | 1.393634  |
| 6                | 1                | 0              | 0.774555                | 1.698331  | 0.356457  |
| 7                | 7                | 0              | -0.970456               | 0.830220  | -0.316083 |
| 8                | 7                | 0              | -1.805689               | -0.040805 | -0.021324 |
| 9                | 7                | 0              | -2.684806               | -0.760430 | 0.167916  |
| 10               | 1                | 0              | 3.085635                | 0.405524  | 0.077703  |
| 11               | 1                | 0              | 2.587601                | -0.781722 | 1.004180  |
| 12               | 8                | 0              | 2.552935                | -0.410951 | 0.102895  |

-----  
**gag**, E = -318.3943798 a.u.  
 -----

| Center<br>Number | Atomic<br>Number | Atomic<br>Type | Coordinates (Angstroms) |           |          |
|------------------|------------------|----------------|-------------------------|-----------|----------|
|                  |                  |                | X                       | Y         | Z        |
| 1                | 6                | 0              | -1.153313               | -0.274315 | 0.432601 |
| 2                | 1                | 0              | -1.321081               | -0.002838 | 1.472031 |
| 3                | 1                | 0              | -0.752186               | -1.280510 | 0.340422 |

|    |   |   |           |           |           |
|----|---|---|-----------|-----------|-----------|
| 4  | 6 | 0 | -0.329773 | 0.750312  | -0.326012 |
| 5  | 1 | 0 | -0.240062 | 0.470435  | -1.378868 |
| 6  | 1 | 0 | -0.771694 | 1.743262  | -0.248960 |
| 7  | 7 | 0 | 0.984595  | 0.839082  | 0.333527  |
| 8  | 7 | 0 | 1.792006  | -0.051094 | 0.018779  |
| 9  | 7 | 0 | 2.647409  | -0.794586 | -0.187459 |
| 10 | 1 | 0 | -2.970045 | -1.188755 | -0.019883 |
| 11 | 1 | 0 | -3.080866 | 0.385858  | -0.046621 |
| 12 | 8 | 0 | -2.491704 | -0.367156 | -0.238947 |

-----  
*gag*<sup>-</sup>, E = -318.3945412 a.u.  
 -----

| Center<br>Number | Atomic<br>Number | Atomic<br>Type | Coordinates (Angstroms) |           |           |
|------------------|------------------|----------------|-------------------------|-----------|-----------|
|                  |                  |                | X                       | Y         | Z         |
| 1                | 6                | 0              | 1.175141                | -0.266742 | -0.441810 |
| 2                | 1                | 0              | 1.343334                | 0.076921  | -1.458719 |
| 3                | 1                | 0              | 0.807438                | -1.290578 | -0.420514 |
| 4                | 6                | 0              | 0.324809                | 0.708818  | 0.351049  |
| 5                | 1                | 0              | 0.209654                | 0.386262  | 1.389864  |
| 6                | 1                | 0              | 0.775700                | 1.699686  | 0.326796  |
| 7                | 7                | 0              | -0.976432               | 0.820830  | -0.328851 |
| 8                | 7                | 0              | -1.809149               | -0.049087 | -0.025052 |
| 9                | 7                | 0              | -2.686209               | -0.769713 | 0.170283  |
| 10               | 1                | 0              | 2.598360                | -0.792003 | 1.000168  |
| 11               | 1                | 0              | 3.235435                | -0.585476 | -0.430567 |
| 12               | 8                | 0              | 2.541614                | -0.270185 | 0.177860  |

-----  
*aga*, E = -318.4006663 a.u.  
 -----

| Center<br>Number | Atomic<br>Number | Atomic<br>Type | Coordinates (Angstroms) |           |           |
|------------------|------------------|----------------|-------------------------|-----------|-----------|
|                  |                  |                | X                       | Y         | Z         |
| 1                | 6                | 0              | -1.734892               | 0.533272  | -0.149016 |
| 2                | 1                | 0              | -1.924797               | 0.650460  | -1.212147 |
| 3                | 1                | 0              | -2.504048               | 1.011302  | 0.450436  |
| 4                | 6                | 0              | -0.326408               | 0.917620  | 0.238056  |
| 5                | 1                | 0              | -0.122129               | 1.927406  | -0.128335 |
| 6                | 1                | 0              | -0.188616               | 0.881517  | 1.322346  |
| 7                | 7                | 0              | 0.517666                | -0.093524 | -0.435932 |
| 8                | 7                | 0              | 1.703987                | -0.122789 | -0.072810 |
| 9                | 7                | 0              | 2.821613                | -0.234659 | 0.171269  |
| 10               | 1                | 0              | -1.006514               | -1.344685 | -0.142339 |
| 11               | 1                | 0              | -2.125190               | -1.177071 | 0.983064  |
| 12               | 8                | 0              | -1.882971               | -0.937185 | 0.069380  |

-----  
*agg*, E = -318.4015986 a.u.  
 -----

| Center<br>Number | Atomic<br>Number | Atomic<br>Type | Coordinates (Angstroms) |          |           |
|------------------|------------------|----------------|-------------------------|----------|-----------|
|                  |                  |                | X                       | Y        | Z         |
| 1                | 6                | 0              | -1.728374               | 0.541356 | -0.160621 |
| 2                | 1                | 0              | -1.905435               | 0.596355 | -1.232507 |
| 3                | 1                | 0              | -2.483731               | 1.068878 | 0.413880  |
| 4                | 6                | 0              | -0.318665               | 0.914969 | 0.220606  |

|    |   |   |           |           |           |
|----|---|---|-----------|-----------|-----------|
| 5  | 1 | 0 | -0.100929 | 1.914867  | -0.163823 |
| 6  | 1 | 0 | -0.194860 | 0.896874  | 1.306908  |
| 7  | 7 | 0 | 0.520300  | -0.119133 | -0.424969 |
| 8  | 7 | 0 | 1.710633  | -0.130899 | -0.074645 |
| 9  | 7 | 0 | 2.831156  | -0.232920 | 0.160908  |
| 10 | 1 | 0 | -2.635105 | -1.339409 | -0.132465 |
| 11 | 1 | 0 | -1.029553 | -1.349888 | -0.069132 |
| 12 | 8 | 0 | -1.850347 | -0.893121 | 0.236021  |

-----  
**agg<sup>-</sup>**, E = -318.397889 a.u.  
 -----

| Center<br>Number | Atomic<br>Number | Atomic<br>Type | Coordinates (Angstroms) |           |           |
|------------------|------------------|----------------|-------------------------|-----------|-----------|
|                  |                  |                | X                       | Y         | Z         |
| 1                | 6                | 0              | -1.658587               | 0.584551  | -0.197655 |
| 2                | 1                | 0              | -1.731911               | 0.646493  | -1.280009 |
| 3                | 1                | 0              | -2.364004               | 1.246834  | 0.298848  |
| 4                | 6                | 0              | -0.255054               | 0.771906  | 0.299541  |
| 5                | 1                | 0              | -0.002930               | 1.824562  | 0.126894  |
| 6                | 1                | 0              | -0.190504               | 0.575801  | 1.375563  |
| 7                | 7                | 0              | 0.623989                | -0.124006 | -0.468720 |
| 8                | 7                | 0              | 1.801357                | -0.146760 | -0.085349 |
| 9                | 7                | 0              | 2.919121                | -0.264037 | 0.167301  |
| 10               | 1                | 0              | -2.102119               | -1.026659 | 1.054395  |
| 11               | 1                | 0              | -2.943077               | -1.054399 | -0.281201 |
| 12               | 8                | 0              | -2.074359               | -0.825969 | 0.100196  |

-----  
**gga**, E = -318.399517 a.u.  
 -----

| Center<br>Number | Atomic<br>Number | Atomic<br>Type | Coordinates (Angstroms) |           |           |
|------------------|------------------|----------------|-------------------------|-----------|-----------|
|                  |                  |                | X                       | Y         | Z         |
| 1                | 6                | 0              | 1.432531                | 0.399611  | 0.620991  |
| 2                | 1                | 0              | 1.037865                | 0.095868  | 1.587222  |
| 3                | 1                | 0              | 2.336249                | 0.993842  | 0.728405  |
| 4                | 6                | 0              | 0.384053                | 1.013997  | -0.285963 |
| 5                | 1                | 0              | -0.122372               | 1.827827  | 0.238090  |
| 6                | 1                | 0              | 0.834192                | 1.397029  | -1.201466 |
| 7                | 7                | 0              | -0.537260               | -0.073091 | -0.694147 |
| 8                | 7                | 0              | -1.603604               | -0.143161 | -0.056895 |
| 9                | 7                | 0              | -2.630650               | -0.299995 | 0.434638  |
| 10               | 1                | 0              | 1.046476                | -1.264152 | -0.442305 |
| 11               | 1                | 0              | 2.551944                | -0.788953 | -0.675416 |
| 12               | 8                | 0              | 1.852092                | -0.891173 | -0.003734 |

-----  
**ggg**, E = -318.400367 a.u.  
 -----

| Center<br>Number | Atomic<br>Number | Atomic<br>Type | Coordinates (Angstroms) |          |           |
|------------------|------------------|----------------|-------------------------|----------|-----------|
|                  |                  |                | X                       | Y        | Z         |
| 1                | 6                | 0              | 1.437753                | 0.392579 | 0.615119  |
| 2                | 1                | 0              | 1.053011                | 0.031798 | 1.567371  |
| 3                | 1                | 0              | 2.323755                | 1.009848 | 0.735022  |
| 4                | 6                | 0              | 0.374029                | 1.022172 | -0.259290 |
| 5                | 1                | 0              | -0.130338               | 1.815638 | 0.296351  |

|    |   |   |           |           |           |
|----|---|---|-----------|-----------|-----------|
| 6  | 1 | 0 | 0.817899  | 1.436020  | -1.164346 |
| 7  | 7 | 0 | -0.546709 | -0.054808 | -0.693826 |
| 8  | 7 | 0 | -1.607222 | -0.148261 | -0.050746 |
| 9  | 7 | 0 | -2.629949 | -0.325029 | 0.443422  |
| 10 | 1 | 0 | 2.419323  | -1.431826 | 0.350382  |
| 11 | 1 | 0 | 1.068945  | -1.247078 | -0.502208 |
| 12 | 8 | 0 | 1.882985  | -0.800779 | -0.163686 |

-----  
**ggg<sup>-</sup>**, E = -318.39718 a.u.  
 -----

| Center<br>Number | Atomic<br>Number | Atomic<br>Type | Coordinates (Angstroms) |           |           |
|------------------|------------------|----------------|-------------------------|-----------|-----------|
|                  |                  |                | X                       | Y         | Z         |
| 1                | 6                | 0              | 1.264833                | 0.027951  | 0.727175  |
| 2                | 1                | 0              | 0.735731                | -0.748730 | 1.274621  |
| 3                | 1                | 0              | 2.051500                | 0.476286  | 1.331026  |
| 4                | 6                | 0              | 0.350240                | 1.061454  | 0.116969  |
| 5                | 1                | 0              | -0.076879               | 1.636210  | 0.946389  |
| 6                | 1                | 0              | 0.909040                | 1.750862  | -0.516100 |
| 7                | 7                | 0              | -0.691759               | 0.470681  | -0.736612 |
| 8                | 7                | 0              | -1.602024               | -0.111693 | -0.127477 |
| 9                | 7                | 0              | -2.512156               | -0.674355 | 0.300811  |
| 10               | 1                | 0              | 2.523638                | -0.169160 | -0.927718 |
| 11               | 1                | 0              | 2.421860                | -1.502744 | -0.087783 |
| 12               | 8                | 0              | 1.923280                | -0.721448 | -0.392795 |

-----  
**g<sup>-</sup>gg<sup>-</sup>**, E = -318.3975246 a.u.  
 -----

| Center<br>Number | Atomic<br>Number | Atomic<br>Type | Coordinates (Angstroms) |           |           |
|------------------|------------------|----------------|-------------------------|-----------|-----------|
|                  |                  |                | X                       | Y         | Z         |
| 1                | 6                | 0              | 1.621754                | -0.230707 | -0.180487 |
| 2                | 1                | 0              | 1.716306                | -0.328539 | -1.258325 |
| 3                | 1                | 0              | 2.573402                | -0.371260 | 0.328531  |
| 4                | 6                | 0              | 0.518842                | -1.093328 | 0.378719  |
| 5                | 1                | 0              | 0.848945                | -2.128265 | 0.275203  |
| 6                | 1                | 0              | 0.357635                | -0.893172 | 1.442815  |
| 7                | 7                | 0              | -0.725528               | -0.965686 | -0.394830 |
| 8                | 7                | 0              | -1.460625               | -0.019643 | -0.073059 |
| 9                | 7                | 0              | -2.248345               | 0.797957  | 0.125280  |
| 10               | 1                | 0              | 1.342501                | 1.527928  | 0.923122  |
| 11               | 1                | 0              | 1.662322                | 1.818134  | -0.597216 |
| 12               | 8                | 0              | 1.212100                | 1.203874  | 0.011843  |

### ***N*-(2-Azidoethyl)ethanamide**

**aag**, E = -450.5141786 a.u.  
 -----

| Center<br>Number | Atomic<br>Number | Atomic<br>Type | Coordinates (Angstroms) |          |           |
|------------------|------------------|----------------|-------------------------|----------|-----------|
|                  |                  |                | X                       | Y        | Z         |
| 1                | 6                | 0              | 0.124893                | 0.911049 | -0.574480 |
| 2                | 1                | 0              | -0.164693               | 1.958261 | -0.676899 |
| 3                | 1                | 0              | 0.199490                | 0.466069 | -1.569187 |
| 4                | 6                | 0              | -0.915061               | 0.156692 | 0.242375  |

|    |   |   |           |           |           |
|----|---|---|-----------|-----------|-----------|
| 5  | 1 | 0 | -0.603164 | -0.883904 | 0.372875  |
| 6  | 1 | 0 | -1.037248 | 0.627246  | 1.223665  |
| 7  | 7 | 0 | -2.187405 | 0.212614  | -0.517214 |
| 8  | 7 | 0 | -3.181984 | -0.187045 | 0.096162  |
| 9  | 7 | 0 | -4.182414 | -0.531995 | 0.558248  |
| 10 | 7 | 0 | 1.424600  | 0.853876  | 0.062822  |
| 11 | 1 | 0 | 1.711508  | 1.613713  | 0.661465  |
| 12 | 6 | 0 | 2.229973  | -0.233141 | -0.053447 |
| 13 | 6 | 0 | 3.539999  | -0.167647 | 0.694990  |
| 14 | 1 | 0 | 3.686922  | 0.779036  | 1.216647  |
| 15 | 1 | 0 | 3.567774  | -0.985183 | 1.418618  |
| 16 | 1 | 0 | 4.354407  | -0.318208 | -0.016447 |
| 17 | 8 | 0 | 1.912076  | -1.211361 | -0.735936 |

-----  
*gag*<sup>-</sup>, E = -450.51487 a.u.  
 -----

| Center<br>Number | Atomic<br>Number | Atomic<br>Type | Coordinates (Angstroms) |           |           |
|------------------|------------------|----------------|-------------------------|-----------|-----------|
|                  |                  |                | X                       | Y         | Z         |
| 1                | 6                | 0              | 0.102376                | -0.747779 | -0.684563 |
| 2                | 1                | 0              | 0.361589                | -1.574513 | -1.348260 |
| 3                | 1                | 0              | 0.352377                | 0.192857  | -1.182799 |
| 4                | 6                | 0              | 0.879627                | -0.864718 | 0.626652  |
| 5                | 1                | 0              | 0.577164                | -0.070014 | 1.315661  |
| 6                | 1                | 0              | 0.694301                | -1.832225 | 1.092664  |
| 7                | 7                | 0              | 2.340473                | -0.809518 | 0.387411  |
| 8                | 7                | 0              | 2.770276                | 0.296246  | 0.036580  |
| 9                | 7                | 0              | 3.304647                | 1.268943  | -0.284000 |
| 10               | 7                | 0              | -1.326243               | -0.772512 | -0.446272 |
| 11               | 1                | 0              | -1.821596               | -1.648955 | -0.516376 |
| 12               | 6                | 0              | -1.992834               | 0.333716  | -0.025997 |
| 13               | 6                | 0              | -3.470666               | 0.159505  | 0.229212  |
| 14               | 1                | 0              | -3.821193               | -0.854626 | 0.033168  |
| 15               | 1                | 0              | -3.676008               | 0.416614  | 1.270503  |
| 16               | 1                | 0              | -4.017566               | 0.859462  | -0.405837 |
| 17               | 8                | 0              | -1.423019               | 1.418118  | 0.126677  |

-----  
*gag*<sup>-</sup>, E = -450.5145153 a.u.  
 -----

| Center<br>Number | Atomic<br>Number | Atomic<br>Type | Coordinates (Angstroms) |           |           |
|------------------|------------------|----------------|-------------------------|-----------|-----------|
|                  |                  |                | X                       | Y         | Z         |
| 1                | 6                | 0              | -0.160975               | -0.350492 | -0.513613 |
| 2                | 1                | 0              | -0.079972               | 0.331770  | -1.362502 |
| 3                | 1                | 0              | -0.732493               | -1.228570 | -0.823597 |
| 4                | 6                | 0              | -0.859832               | 0.362648  | 0.643815  |
| 5                | 1                | 0              | -0.963957               | -0.310718 | 1.501438  |
| 6                | 1                | 0              | -0.283006               | 1.236577  | 0.942795  |
| 7                | 7                | 0              | -2.184855               | 0.880285  | 0.232275  |
| 8                | 7                | 0              | -3.047064               | 0.018270  | 0.023856  |
| 9                | 7                | 0              | -3.946146               | -0.674261 | -0.192195 |
| 10               | 7                | 0              | 1.166675                | -0.785903 | -0.131255 |
| 11               | 1                | 0              | 1.294717                | -1.724974 | 0.215175  |
| 12               | 6                | 0              | 2.218155                | 0.073656  | -0.108386 |
| 13               | 6                | 0              | 3.533882                | -0.504572 | 0.355232  |

|    |   |   |          |           |           |
|----|---|---|----------|-----------|-----------|
| 14 | 1 | 0 | 3.466835 | -1.560686 | 0.619978  |
| 15 | 1 | 0 | 4.268412 | -0.379231 | -0.443025 |
| 16 | 1 | 0 | 3.876922 | 0.063486  | 1.222466  |
| 17 | 8 | 0 | 2.105612 | 1.252022  | -0.457973 |

-----  
*agg*, E = -450.5160516 a.u.  
 -----

| Center<br>Number | Atomic<br>Number | Atomic<br>Type | Coordinates (Angstroms) |           |           |
|------------------|------------------|----------------|-------------------------|-----------|-----------|
|                  |                  |                | X                       | Y         | Z         |
| 1                | 6                | 0              | 0.228551                | -1.448376 | -0.446474 |
| 2                | 1                | 0              | -0.084690               | -1.928868 | -1.375426 |
| 3                | 1                | 0              | 0.773459                | -2.176724 | 0.157844  |
| 4                | 6                | 0              | -0.986586               | -0.978965 | 0.334606  |
| 5                | 1                | 0              | -1.635717               | -1.830327 | 0.566731  |
| 6                | 1                | 0              | -0.670688               | -0.496699 | 1.264906  |
| 7                | 7                | 0              | -1.709218               | -0.005359 | -0.520192 |
| 8                | 7                | 0              | -2.697555               | 0.520023  | 0.001059  |
| 9                | 7                | 0              | -3.636589               | 1.079833  | 0.373569  |
| 10               | 7                | 0              | 1.121953                | -0.356450 | -0.776937 |
| 11               | 1                | 0              | 0.964449                | 0.149666  | -1.635641 |
| 12               | 6                | 0              | 1.961714                | 0.179481  | 0.145553  |
| 13               | 6                | 0              | 2.726275                | 1.405639  | -0.293561 |
| 14               | 1                | 0              | 2.605020                | 1.624855  | -1.355365 |
| 15               | 1                | 0              | 2.374364                | 2.259770  | 0.290245  |
| 16               | 1                | 0              | 3.784518                | 1.257183  | -0.071530 |
| 17               | 8                | 0              | 2.094927                | -0.308982 | 1.271875  |

-----  
*agg*<sup>-</sup>, E = -450.5151933 a.u.  
 -----

| Center<br>Number | Atomic<br>Number | Atomic<br>Type | Coordinates (Angstroms) |           |           |
|------------------|------------------|----------------|-------------------------|-----------|-----------|
|                  |                  |                | X                       | Y         | Z         |
| 1                | 6                | 0              | 0.223859                | 1.560293  | 0.175146  |
| 2                | 1                | 0              | 0.355142                | 1.439018  | 1.250852  |
| 3                | 1                | 0              | 0.397929                | 2.608747  | -0.083283 |
| 4                | 6                | 0              | -1.194807               | 1.191135  | -0.221098 |
| 5                | 1                | 0              | -1.903174               | 1.842860  | 0.302252  |
| 6                | 1                | 0              | -1.334166               | 1.306187  | -1.302022 |
| 7                | 7                | 0              | -1.418506               | -0.223331 | 0.161031  |
| 8                | 7                | 0              | -2.571627               | -0.631872 | -0.004177 |
| 9                | 7                | 0              | -3.607226               | -1.131048 | -0.116934 |
| 10               | 7                | 0              | 1.205932                | 0.724913  | -0.482973 |
| 11               | 1                | 0              | 1.326097                | 0.821655  | -1.481069 |
| 12               | 6                | 0              | 1.897456                | -0.256287 | 0.153420  |
| 13               | 6                | 0              | 2.806804                | -1.081586 | -0.727725 |
| 14               | 1                | 0              | 2.883708                | -0.695535 | -1.745173 |
| 15               | 1                | 0              | 3.799492                | -1.112528 | -0.275053 |
| 16               | 1                | 0              | 2.418651                | -2.102484 | -0.761696 |
| 17               | 8                | 0              | 1.799555                | -0.469986 | 1.364763  |

-----  
*ggg*, E = -450.5159593 a.u.  
 -----

| Center<br>Number | Atomic<br>Number | Atomic<br>Type | Coordinates (Angstroms) |   |   |
|------------------|------------------|----------------|-------------------------|---|---|
|                  |                  |                | X                       | Y | Z |

|    |   |   |           |           |           |
|----|---|---|-----------|-----------|-----------|
| 1  | 6 | 0 | -0.145763 | 0.730201  | 0.922592  |
| 2  | 1 | 0 | -0.834130 | 0.377515  | 1.694781  |
| 3  | 1 | 0 | 0.384841  | 1.603302  | 1.311528  |
| 4  | 6 | 0 | -0.911708 | 1.148747  | -0.327911 |
| 5  | 1 | 0 | -1.593283 | 1.973457  | -0.091618 |
| 6  | 1 | 0 | -0.218646 | 1.469364  | -1.103733 |
| 7  | 7 | 0 | -1.665805 | 0.016689  | -0.918715 |
| 8  | 7 | 0 | -2.608023 | -0.403930 | -0.238225 |
| 9  | 7 | 0 | -3.514316 | -0.888005 | 0.290797  |
| 10 | 7 | 0 | 0.812314  | -0.324464 | 0.658847  |
| 11 | 1 | 0 | 0.543324  | -1.283076 | 0.821828  |
| 12 | 6 | 0 | 1.987436  | -0.073470 | 0.028146  |
| 13 | 6 | 0 | 2.848208  | -1.277955 | -0.269860 |
| 14 | 1 | 0 | 2.451311  | -2.200661 | 0.155627  |
| 15 | 1 | 0 | 2.926227  | -1.388154 | -1.354070 |
| 16 | 1 | 0 | 3.849935  | -1.097869 | 0.124674  |
| 17 | 8 | 0 | 2.331524  | 1.072369  | -0.278219 |

**ggg<sup>-</sup>**, E = -450.5170655 a.u.

| Center Number | Atomic Number | Atomic Type | Coordinates (Angstroms) |           |           |
|---------------|---------------|-------------|-------------------------|-----------|-----------|
|               |               |             | X                       | Y         | Z         |
| 1             | 6             | 0           | 0.138523                | 1.371789  | -0.773783 |
| 2             | 1             | 0           | 0.382432                | 0.637548  | -1.544495 |
| 3             | 1             | 0           | 0.017399                | 2.346724  | -1.254085 |
| 4             | 6             | 0           | 1.269096                | 1.464419  | 0.246539  |
| 5             | 1             | 0           | 2.191508                | 1.787880  | -0.249347 |
| 6             | 1             | 0           | 1.018975                | 2.181468  | 1.028693  |
| 7             | 7             | 0           | 1.487872                | 0.181187  | 0.952651  |
| 8             | 7             | 0           | 1.937491                | -0.733324 | 0.253508  |
| 9             | 7             | 0           | 2.361920                | -1.666470 | -0.278369 |
| 10            | 7             | 0           | -1.116519               | 0.977371  | -0.169988 |
| 11            | 1             | 0           | -1.645918               | 1.669979  | 0.339307  |
| 12            | 6             | 0           | -1.544975               | -0.311709 | -0.147124 |
| 13            | 6             | 0           | -2.827286               | -0.558773 | 0.612622  |
| 14            | 1             | 0           | -3.326582               | 0.361426  | 0.919437  |
| 15            | 1             | 0           | -3.499416               | -1.145392 | -0.016033 |
| 16            | 1             | 0           | -2.592731               | -1.150059 | 1.501249  |
| 17            | 8             | 0           | -0.931644               | -1.224409 | -0.707358 |

**g<sup>-</sup>gg**, E = -450.5176513 a.u.

| Center Number | Atomic Number | Atomic Type | Coordinates (Angstroms) |           |           |
|---------------|---------------|-------------|-------------------------|-----------|-----------|
|               |               |             | X                       | Y         | Z         |
| 1             | 6             | 0           | 0.298124                | -1.565057 | 0.588672  |
| 2             | 1             | 0           | 0.753905                | -1.833553 | 1.543030  |
| 3             | 1             | 0           | -0.250085               | -2.429948 | 0.203042  |
| 4             | 6             | 0           | 1.385359                | -1.188448 | -0.413119 |
| 5             | 1             | 0           | 2.087282                | -2.015119 | -0.525896 |
| 6             | 1             | 0           | 0.945405                | -0.956216 | -1.386953 |
| 7             | 7             | 0           | 2.188101                | -0.039968 | 0.068688  |
| 8             | 7             | 0           | 1.670241                | 1.073070  | -0.079339 |

|    |   |   |           |           |           |
|----|---|---|-----------|-----------|-----------|
| 9  | 7 | 0 | 1.327867  | 2.172310  | -0.184170 |
| 10 | 7 | 0 | -0.623482 | -0.471364 | 0.829740  |
| 11 | 1 | 0 | -0.570427 | 0.032367  | 1.702560  |
| 12 | 6 | 0 | -1.558968 | -0.104381 | -0.084026 |
| 13 | 6 | 0 | -2.392096 | 1.100693  | 0.280147  |
| 14 | 1 | 0 | -2.368678 | 1.323000  | 1.348091  |
| 15 | 1 | 0 | -2.003776 | 1.964642  | -0.266882 |
| 16 | 1 | 0 | -3.421373 | 0.929612  | -0.037133 |
| 17 | 8 | 0 | -1.688232 | -0.701245 | -1.156792 |

-----  
***g<sup>-</sup>gg<sup>-</sup>***, E = -450.5175991 a.u.  
 -----

| Center<br>Number | Atomic<br>Number | Atomic<br>Type | Coordinates (Angstroms) |           |           |
|------------------|------------------|----------------|-------------------------|-----------|-----------|
|                  |                  |                | X                       | Y         | Z         |
| 1                | 6                | 0              | 0.640040                | -1.629472 | -0.050887 |
| 2                | 1                | 0              | 0.483085                | -1.763071 | 1.020145  |
| 3                | 1                | 0              | 0.734939                | -2.612897 | -0.520794 |
| 4                | 6                | 0              | 1.923317                | -0.840830 | -0.288399 |
| 5                | 1                | 0              | 2.777138                | -1.401801 | 0.092808  |
| 6                | 1                | 0              | 2.071251                | -0.655404 | -1.358266 |
| 7                | 7                | 0              | 1.930517                | 0.440196  | 0.451077  |
| 8                | 7                | 0              | 1.176951                | 1.324171  | 0.028311  |
| 9                | 7                | 0              | 0.557709                | 2.257613  | -0.259943 |
| 10               | 7                | 0              | -0.522280               | -0.948112 | -0.583995 |
| 11               | 1                | 0              | -0.677769               | -0.971726 | -1.581797 |
| 12               | 6                | 0              | -1.425797               | -0.289629 | 0.191997  |
| 13               | 6                | 0              | -2.531133               | 0.408943  | -0.562475 |
| 14               | 1                | 0              | -2.649957               | 0.038564  | -1.581983 |
| 15               | 1                | 0              | -3.466611               | 0.287198  | -0.015220 |
| 16               | 1                | 0              | -2.291955               | 1.475673  | -0.600982 |
| 17               | 8                | 0              | -1.327371               | -0.225959 | 1.419565  |

**Water**  
**1,2-Diazidoethane**

***aaa***, E = -406.1999089 a.u.  
 -----

| Center<br>Number | Atomic<br>Number | Atomic<br>Type | Coordinates (Angstroms) |           |           |
|------------------|------------------|----------------|-------------------------|-----------|-----------|
|                  |                  |                | X                       | Y         | Z         |
| 1                | 6                | 0              | -0.397121               | 0.645393  | 0.118890  |
| 2                | 1                | 0              | -1.059017               | 0.678602  | 0.990282  |
| 3                | 1                | 0              | -0.995640               | 0.722063  | -0.794091 |
| 4                | 6                | 0              | 0.397121                | -0.645393 | 0.118890  |
| 5                | 1                | 0              | 0.995640                | -0.722063 | -0.794091 |
| 6                | 1                | 0              | 1.059017                | -0.678602 | 0.990282  |
| 7                | 7                | 0              | 0.591307                | 1.743853  | 0.189287  |
| 8                | 7                | 0              | 0.144880                | 2.869280  | -0.056955 |
| 9                | 7                | 0              | -0.144880               | 3.967264  | -0.262265 |
| 10               | 7                | 0              | -0.591307               | -1.743853 | 0.189287  |
| 11               | 7                | 0              | -0.144880               | -2.869280 | -0.056955 |
| 12               | 7                | 0              | 0.144880                | -3.967264 | -0.262265 |

-----  
***aag***, E = -406.2002744 a.u.  
 -----



| Center<br>Number | Atomic<br>Number | Atomic<br>Type | Coordinates (Angstroms) |           |           |
|------------------|------------------|----------------|-------------------------|-----------|-----------|
|                  |                  |                | X                       | Y         | Z         |
| 1                | 6                | 0              | -0.398848               | 0.003382  | 0.227167  |
| 2                | 1                | 0              | -0.536271               | 0.041933  | 1.312529  |
| 3                | 1                | 0              | -0.103757               | -1.011073 | -0.064001 |
| 4                | 6                | 0              | 0.657679                | 1.011987  | -0.195947 |
| 5                | 1                | 0              | 0.776142                | 1.006315  | -1.284415 |
| 6                | 1                | 0              | 0.373799                | 2.012861  | 0.126716  |
| 7                | 7                | 0              | -1.647164               | 0.382107  | -0.473157 |
| 8                | 7                | 0              | -2.666885               | -0.185118 | -0.065951 |
| 9                | 7                | 0              | -3.686900               | -0.644196 | 0.217824  |
| 10               | 7                | 0              | 1.944917                | 0.724562  | 0.470702  |
| 11               | 7                | 0              | 2.545181                | -0.274554 | 0.053532  |
| 12               | 7                | 0              | 3.216152                | -1.165980 | -0.242685 |

*gag*, E = -406.2007694 a.u.

| Center<br>Number | Atomic<br>Number | Atomic<br>Type | Coordinates (Angstroms) |           |           |
|------------------|------------------|----------------|-------------------------|-----------|-----------|
|                  |                  |                | X                       | Y         | Z         |
| 1                | 6                | 0              | -0.750604               | 0.139557  | -0.702255 |
| 2                | 1                | 0              | -1.028430               | 0.685986  | -1.602842 |
| 3                | 1                | 0              | -1.037450               | 0.730050  | 0.175198  |
| 4                | 6                | 0              | 0.750604                | -0.139557 | -0.702255 |
| 5                | 1                | 0              | 1.037450                | -0.730050 | 0.175198  |
| 6                | 1                | 0              | 1.028430                | -0.685986 | -1.602842 |
| 7                | 7                | 0              | -1.517061               | -1.124397 | -0.740989 |
| 8                | 7                | 0              | -1.517061               | -1.771052 | 0.314991  |
| 9                | 7                | 0              | -1.613391               | -2.465860 | 1.231880  |
| 10               | 7                | 0              | 1.517061                | 1.124397  | -0.740989 |
| 11               | 7                | 0              | 1.517061                | 1.771052  | 0.314991  |
| 12               | 7                | 0              | 1.613391                | 2.465860  | 1.231880  |

*gag*<sup>-</sup>, E = -406.2006375 a.u.

| Center<br>Number | Atomic<br>Number | Atomic<br>Type | Coordinates (Angstroms) |           |           |
|------------------|------------------|----------------|-------------------------|-----------|-----------|
|                  |                  |                | X                       | Y         | Z         |
| 1                | 6                | 0              | 0.365910                | -0.615090 | 0.265236  |
| 2                | 1                | 0              | 0.365964                | -0.621745 | 1.355736  |
| 3                | 1                | 0              | 1.401231                | -0.622643 | -0.090519 |
| 4                | 6                | 0              | -0.365910               | 0.615090  | -0.265236 |
| 5                | 1                | 0              | -0.365964               | 0.621745  | -1.355736 |
| 6                | 1                | 0              | -1.401231               | 0.622643  | 0.090519  |
| 7                | 7                | 0              | -0.336012               | -1.853402 | -0.135298 |
| 8                | 7                | 0              | -0.247845               | -2.144097 | -1.335520 |
| 9                | 7                | 0              | -0.238252               | -2.540409 | -2.419742 |
| 10               | 7                | 0              | 0.336012                | 1.853402  | 0.135298  |
| 11               | 7                | 0              | 0.247845                | 2.144097  | 1.335520  |
| 12               | 7                | 0              | 0.238252                | 2.540409  | 2.419742  |

*aga*, E = -406.2021528 a.u.

| Center<br>Number | Atomic<br>Number | Atomic<br>Type | Coordinates (Angstroms) |           |           |
|------------------|------------------|----------------|-------------------------|-----------|-----------|
|                  |                  |                | X                       | Y         | Z         |
| 1                | 6                | 0              | -0.320853               | -0.682679 | 0.977608  |
| 2                | 1                | 0              | -0.041140               | -1.209944 | 1.895714  |
| 3                | 1                | 0              | -1.410752               | -0.586608 | 0.932539  |
| 4                | 6                | 0              | 0.320853                | 0.682679  | 0.977608  |
| 5                | 1                | 0              | 0.041140                | 1.209944  | 1.895714  |
| 6                | 1                | 0              | 1.410752                | 0.586608  | 0.932539  |
| 7                | 7                | 0              | -0.179402               | 1.419396  | -0.204725 |
| 8                | 7                | 0              | 0.320853                | 2.535148  | -0.379874 |
| 9                | 7                | 0              | 0.179402                | -1.419396 | -0.204725 |
| 10               | 7                | 0              | -0.320853               | -2.535148 | -0.379874 |
| 11               | 7                | 0              | 0.710098                | 3.586128  | -0.657387 |
| 12               | 7                | 0              | -0.710098               | -3.586128 | -0.657387 |

*agg*, E = -406.2022324 a.u.

| Center<br>Number | Atomic<br>Number | Atomic<br>Type | Coordinates (Angstroms) |           |           |
|------------------|------------------|----------------|-------------------------|-----------|-----------|
|                  |                  |                | X                       | Y         | Z         |
| 1                | 6                | 0              | -0.886237               | 1.388619  | 0.083333  |
| 2                | 1                | 0              | -1.529370               | 1.757980  | 0.889295  |
| 3                | 1                | 0              | -0.666340               | 2.209258  | -0.598850 |
| 4                | 6                | 0              | 0.395724                | 0.841775  | 0.678764  |
| 5                | 1                | 0              | 0.869567                | 1.619599  | 1.287393  |
| 6                | 1                | 0              | 0.186228                | -0.023542 | 1.318455  |
| 7                | 7                | 0              | 1.287421                | 0.455587  | -0.436546 |
| 8                | 7                | 0              | 2.205847                | -0.314037 | -0.135649 |
| 9                | 7                | 0              | -1.608403               | 0.385306  | -0.730395 |
| 10               | 7                | 0              | -1.994806               | -0.614289 | -0.113449 |
| 11               | 7                | 0              | 3.103055                | -1.024490 | 0.013911  |
| 12               | 7                | 0              | -2.409830               | -1.594599 | 0.335146  |

*agg*<sup>-</sup>, E = -406.2035915 a.u.

| Center<br>Number | Atomic<br>Number | Atomic<br>Type | Coordinates (Angstroms) |           |           |
|------------------|------------------|----------------|-------------------------|-----------|-----------|
|                  |                  |                | X                       | Y         | Z         |
| 1                | 6                | 0              | 1.000897                | 1.396086  | 0.263774  |
| 2                | 1                | 0              | 1.362552                | 2.385424  | -0.016514 |
| 3                | 1                | 0              | 1.145573                | 1.255860  | 1.340076  |
| 4                | 6                | 0              | -0.467602               | 1.282928  | -0.089631 |
| 5                | 1                | 0              | -1.029145               | 2.068402  | 0.428504  |
| 6                | 1                | 0              | -0.603711               | 1.386426  | -1.170932 |
| 7                | 7                | 0              | -0.923592               | -0.053369 | 0.356794  |
| 8                | 7                | 0              | -2.076737               | -0.355565 | 0.034435  |
| 9                | 7                | 0              | 1.827522                | 0.436632  | -0.497907 |
| 10               | 7                | 0              | 1.808337                | -0.733683 | -0.096178 |
| 11               | 7                | 0              | -3.134164               | -0.752774 | -0.202945 |
| 12               | 7                | 0              | 1.916485                | -1.851269 | 0.173515  |

*ggg*, E = -406.2023662 a.u.

| Center | Atomic | Atomic | Coordinates (Angstroms) |  |  |
|--------|--------|--------|-------------------------|--|--|
|--------|--------|--------|-------------------------|--|--|

| Number | Number | Type | X         | Y         | Z         |
|--------|--------|------|-----------|-----------|-----------|
| 1      | 6      | 0    | -0.709889 | -0.275252 | 1.032187  |
| 2      | 1      | 0    | -0.852036 | -0.897155 | 1.923097  |
| 3      | 1      | 0    | -1.442547 | 0.532352  | 1.054227  |
| 4      | 6      | 0    | 0.709889  | 0.275252  | 1.032187  |
| 5      | 1      | 0    | 0.852036  | 0.897155  | 1.923097  |
| 6      | 1      | 0    | 1.442547  | -0.532352 | 1.054227  |
| 7      | 7      | 0    | 1.020449  | 1.043799  | -0.192430 |
| 8      | 7      | 0    | 0.297620  | 2.025200  | -0.400881 |
| 9      | 7      | 0    | -1.020449 | -1.043799 | -0.192430 |
| 10     | 7      | 0    | -0.297620 | -2.025200 | -0.400881 |
| 11     | 7      | 0    | -0.297620 | 2.963331  | -0.716752 |
| 12     | 7      | 0    | 0.297620  | -2.963331 | -0.716752 |

$g^-gg^-$ , E = -406.2037031 a.u.

| Center Number | Atomic Number | Atomic Type | Coordinates (Angstroms) |           |           |
|---------------|---------------|-------------|-------------------------|-----------|-----------|
|               |               |             | X                       | Y         | Z         |
| 1             | 6             | 0           | -0.260727               | -0.715625 | 1.557914  |
| 2             | 1             | 0           | 0.102096                | -1.226331 | 2.451121  |
| 3             | 1             | 0           | -1.354910               | -0.721764 | 1.560374  |
| 4             | 6             | 0           | 0.260727                | 0.715625  | 1.557914  |
| 5             | 1             | 0           | -0.102096               | 1.226331  | 2.451121  |
| 6             | 1             | 0           | 1.354910                | 0.721764  | 1.560374  |
| 7             | 7             | 0           | -0.260727               | 1.483727  | 0.407237  |
| 8             | 7             | 0           | 0.391858                | 1.396695  | -0.640741 |
| 9             | 7             | 0           | 0.260727                | -1.483727 | 0.407237  |
| 10            | 7             | 0           | -0.391858               | -1.396695 | -0.640741 |
| 11            | 7             | 0           | 0.905786                | 1.427204  | -1.674921 |
| 12            | 7             | 0           | -0.905786               | -1.427204 | -1.674921 |

$ggg^-$ , E = -406.2038339 a.u.

| Center Number | Atomic Number | Atomic Type | Coordinates (Angstroms) |           |           |
|---------------|---------------|-------------|-------------------------|-----------|-----------|
|               |               |             | X                       | Y         | Z         |
| 1             | 6             | 0           | -0.445882               | 1.490467  | -0.381798 |
| 2             | 1             | 0           | -1.230335               | 2.133003  | 0.033523  |
| 3             | 1             | 0           | -0.019811               | 1.966741  | -1.263978 |
| 4             | 6             | 0           | 0.637579                | 1.262908  | 0.662840  |
| 5             | 1             | 0           | 1.048760                | 2.224922  | 0.970555  |
| 6             | 1             | 0           | 0.230377                | 0.760246  | 1.548096  |
| 7             | 7             | 0           | 1.773879                | 0.493827  | 0.115726  |
| 8             | 7             | 0           | 1.577878                | -0.718047 | -0.041311 |
| 9             | 7             | 0           | -1.019179               | 0.213889  | -0.865114 |
| 10            | 7             | 0           | -1.699266               | -0.409764 | -0.040721 |
| 11            | 7             | 0           | 1.555628                | -1.860183 | -0.213371 |
| 12            | 7             | 0           | -2.357393               | -1.091888 | 0.619871  |

## 2-Azidoethanamine

$aaa$ , E = -298.1506449 a.u.

| Center<br>Number | Atomic<br>Number | Atomic<br>Type | Coordinates (Angstroms) |           |           |
|------------------|------------------|----------------|-------------------------|-----------|-----------|
|                  |                  |                | X                       | Y         | Z         |
| 1                | 6                | 0              | -1.497066               | 0.746759  | 0.000000  |
| 2                | 1                | 0              | -1.945580               | 0.283183  | 0.882839  |
| 3                | 1                | 0              | -1.945580               | 0.283183  | -0.882839 |
| 4                | 6                | 0              | 0.000000                | 0.463305  | 0.000000  |
| 5                | 1                | 0              | 0.468091                | 0.894907  | -0.892218 |
| 6                | 1                | 0              | 0.468091                | 0.894907  | 0.892218  |
| 7                | 7                | 0              | 0.181981                | -1.011123 | 0.000000  |
| 8                | 7                | 0              | 1.354086                | -1.397745 | 0.000000  |
| 9                | 7                | 0              | 2.402280                | -1.883610 | 0.000000  |
| 10               | 7                | 0              | -1.826527               | 2.169437  | 0.000000  |
| 11               | 1                | 0              | -1.422686               | 2.622362  | 0.814525  |
| 12               | 1                | 0              | -1.422686               | 2.622362  | -0.814525 |

*aag*, E = -298.1500906 a.u.

| Center<br>Number | Atomic<br>Number | Atomic<br>Type | Coordinates (Angstroms) |           |           |
|------------------|------------------|----------------|-------------------------|-----------|-----------|
|                  |                  |                | X                       | Y         | Z         |
| 1                | 6                | 0              | 1.579592                | 0.494308  | -0.043961 |
| 2                | 1                | 0              | 1.585686                | 1.181991  | 0.811933  |
| 3                | 1                | 0              | 1.563795                | 1.094285  | -0.957155 |
| 4                | 6                | 0              | 0.317375                | -0.346689 | 0.018001  |
| 5                | 1                | 0              | 0.223726                | -0.952769 | -0.888735 |
| 6                | 1                | 0              | 0.345052                | -1.010901 | 0.889659  |
| 7                | 7                | 0              | -0.836014               | 0.579449  | 0.139411  |
| 8                | 7                | 0              | -1.946343               | 0.056179  | 0.010187  |
| 9                | 7                | 0              | -3.037013               | -0.311044 | -0.089230 |
| 10               | 7                | 0              | 2.739727                | -0.397717 | -0.093625 |
| 11               | 1                | 0              | 3.578040                | 0.142479  | -0.282722 |
| 12               | 1                | 0              | 2.879401                | -0.828864 | 0.815579  |

*gaa*, E = -298.1511552 a.u.

| Center<br>Number | Atomic<br>Number | Atomic<br>Type | Coordinates (Angstroms) |           |           |
|------------------|------------------|----------------|-------------------------|-----------|-----------|
|                  |                  |                | X                       | Y         | Z         |
| 1                | 6                | 0              | 1.196874                | -0.352054 | -0.384701 |
| 2                | 1                | 0              | 1.212760                | -0.176285 | -1.463738 |
| 3                | 1                | 0              | 0.678328                | -1.300797 | -0.213518 |
| 4                | 6                | 0              | 0.414441                | 0.778375  | 0.285091  |
| 5                | 1                | 0              | 0.365455                | 0.621520  | 1.369052  |
| 6                | 1                | 0              | 0.892085                | 1.739756  | 0.092172  |
| 7                | 7                | 0              | -0.956374               | 0.903086  | -0.270192 |
| 8                | 7                | 0              | -1.718621               | -0.034952 | -0.012748 |
| 9                | 7                | 0              | -2.535333               | -0.834287 | 0.160340  |
| 10               | 7                | 0              | 2.570954                | -0.486577 | 0.091762  |
| 11               | 1                | 0              | 3.079885                | 0.378538  | -0.064493 |
| 12               | 1                | 0              | 2.579215                | -0.651546 | 1.094045  |

*gag*, E = -298.1504917 a.u.

| Center | Atomic | Atomic | Coordinates (Angstroms) |  |  |
|--------|--------|--------|-------------------------|--|--|
|--------|--------|--------|-------------------------|--|--|

| Number | Number | Type | X         | Y         | Z         |
|--------|--------|------|-----------|-----------|-----------|
| 1      | 6      | 0    | -1.185963 | -0.369726 | 0.326472  |
| 2      | 1      | 0    | -1.158865 | -0.280149 | 1.420389  |
| 3      | 1      | 0    | -0.698679 | -1.311576 | 0.056420  |
| 4      | 6      | 0    | -0.403916 | 0.790727  | -0.275506 |
| 5      | 1      | 0    | -0.345257 | 0.686651  | -1.363934 |
| 6      | 1      | 0    | -0.884943 | 1.740751  | -0.039170 |
| 7      | 7      | 0    | 0.958343  | 0.891689  | 0.302743  |
| 8      | 7      | 0    | 1.719782  | -0.039904 | 0.020287  |
| 9      | 7      | 0    | 2.534308  | -0.837172 | -0.170045 |
| 10     | 7      | 0    | -2.538175 | -0.376268 | -0.235791 |
| 11     | 1      | 0    | -3.020483 | -1.224507 | 0.044784  |
| 12     | 1      | 0    | -3.072303 | 0.394414  | 0.155358  |

*gag*<sup>-</sup>, E = -298.1504552 a.u.

| Center Number | Atomic Number | Atomic Type | Coordinates (Angstroms) |           |           |
|---------------|---------------|-------------|-------------------------|-----------|-----------|
|               |               |             | X                       | Y         | Z         |
| 1             | 6             | 0           | 1.205606                | -0.305402 | -0.393353 |
| 2             | 1             | 0           | 1.269432                | -0.095637 | -1.464032 |
| 3             | 1             | 0           | 0.674741                | -1.260020 | -0.270188 |
| 4             | 6             | 0           | 0.402121                | 0.803183  | 0.274246  |
| 5             | 1             | 0           | 0.354503                | 0.646173  | 1.358312  |
| 6             | 1             | 0           | 0.862225                | 1.771406  | 0.080693  |
| 7             | 7             | 0           | -0.970214               | 0.894499  | -0.279901 |
| 8             | 7             | 0           | -1.714138               | -0.055705 | -0.013058 |
| 9             | 7             | 0           | -2.516438               | -0.867432 | 0.168081  |
| 10            | 7             | 0           | 2.559317                | -0.316113 | 0.164606  |
| 11            | 1             | 0           | 2.537329                | -0.691642 | 1.108403  |
| 12            | 1             | 0           | 3.145717                | -0.943714 | -0.376649 |

*aga*, E = -298.1522033 a.u.

| Center Number | Atomic Number | Atomic Type | Coordinates (Angstroms) |           |           |
|---------------|---------------|-------------|-------------------------|-----------|-----------|
|               |               |             | X                       | Y         | Z         |
| 1             | 6             | 0           | -1.759115               | 0.475903  | -0.154406 |
| 2             | 1             | 0           | -1.854264               | 0.681022  | -1.224773 |
| 3             | 1             | 0           | -2.441901               | 1.149128  | 0.371755  |
| 4             | 6             | 0           | -0.340884               | 0.810896  | 0.282051  |
| 5             | 1             | 0           | -0.120627               | 1.869723  | 0.105596  |
| 6             | 1             | 0           | -0.209247               | 0.587596  | 1.347040  |
| 7             | 7             | 0           | 0.583711                | -0.027633 | -0.524597 |
| 8             | 7             | 0           | 1.733443                | -0.123520 | -0.087131 |
| 9             | 7             | 0           | 2.835991                | -0.285627 | 0.216742  |
| 10            | 7             | 0           | -2.172667               | -0.902872 | 0.093804  |
| 11            | 1             | 0           | -1.508524               | -1.532981 | -0.347668 |
| 12            | 1             | 0           | -2.128785               | -1.097725 | 1.090448  |

*agg*, E = -298.15207 a.u.

| Center Number | Atomic Number | Atomic Type | Coordinates (Angstroms) |   |   |
|---------------|---------------|-------------|-------------------------|---|---|
|               |               |             | X                       | Y | Z |

|    |   |   |           |           |           |
|----|---|---|-----------|-----------|-----------|
| 1  | 6 | 0 | 1.744107  | 0.490163  | 0.174751  |
| 2  | 1 | 0 | 1.827025  | 0.630687  | 1.261232  |
| 3  | 1 | 0 | 2.410355  | 1.210573  | -0.307824 |
| 4  | 6 | 0 | 0.327360  | 0.812114  | -0.248014 |
| 5  | 1 | 0 | 0.069166  | 1.841817  | 0.019984  |
| 6  | 1 | 0 | 0.218651  | 0.673692  | -1.328934 |
| 7  | 7 | 0 | -0.575527 | -0.127096 | 0.469992  |
| 8  | 7 | 0 | -1.745697 | -0.140799 | 0.078781  |
| 9  | 7 | 0 | -2.863100 | -0.244603 | -0.195061 |
| 10 | 7 | 0 | 2.106533  | -0.856195 | -0.271166 |
| 11 | 1 | 0 | 3.064685  | -1.057746 | -0.000617 |
| 12 | 1 | 0 | 1.525852  | -1.531827 | 0.217918  |

*agg*<sup>-</sup>, E = -298.1502115 a.u.

| Center Number | Atomic Number | Atomic Type | Coordinates (Angstroms) |           |           |
|---------------|---------------|-------------|-------------------------|-----------|-----------|
|               |               |             | X                       | Y         | Z         |
| 1             | 6             | 0           | -1.728030               | 0.497168  | -0.164737 |
| 2             | 1             | 0           | -1.770153               | 0.683120  | -1.241318 |
| 3             | 1             | 0           | -2.369387               | 1.241425  | 0.327148  |
| 4             | 6             | 0           | -0.312267               | 0.738970  | 0.317757  |
| 5             | 1             | 0           | -0.067609               | 1.803822  | 0.242546  |
| 6             | 1             | 0           | -0.211499               | 0.427806  | 1.364389  |
| 7             | 7             | 0           | 0.624283                | -0.039208 | -0.531495 |
| 8             | 7             | 0           | 1.774400                | -0.135602 | -0.096372 |
| 9             | 7             | 0           | 2.879121                | -0.297743 | 0.201378  |
| 10            | 7             | 0           | -2.139516               | -0.884690 | 0.087611  |
| 11            | 1             | 0           | -2.255331               | -1.024225 | 1.087779  |
| 12            | 1             | 0           | -3.052261               | -1.048079 | -0.326520 |

*gga*, E = -298.1522917 a.u.

| Center Number | Atomic Number | Atomic Type | Coordinates (Angstroms) |           |           |
|---------------|---------------|-------------|-------------------------|-----------|-----------|
|               |               |             | X                       | Y         | Z         |
| 1             | 6             | 0           | 1.318232                | -0.042718 | 0.679188  |
| 2             | 1             | 0           | 0.708133                | -0.686033 | 1.322261  |
| 3             | 1             | 0           | 2.080690                | 0.416410  | 1.316040  |
| 4             | 6             | 0           | 0.445871                | 1.073974  | 0.112677  |
| 5             | 1             | 0           | 0.027837                | 1.686994  | 0.919718  |
| 6             | 1             | 0           | 1.026530                | 1.713538  | -0.553328 |
| 7             | 7             | 0           | -0.653415               | 0.537253  | -0.732457 |
| 8             | 7             | 0           | -1.528667               | -0.085030 | -0.121218 |
| 9             | 7             | 0           | -2.414144               | -0.678031 | 0.326286  |
| 10            | 7             | 0           | 1.981243                | -0.879891 | -0.317571 |
| 11            | 1             | 0           | 1.287352                | -1.273494 | -0.947023 |
| 12            | 1             | 0           | 2.589722                | -0.305060 | -0.894135 |

*ggg*, E = -298.1521449 a.u.

| Center Number | Atomic Number | Atomic Type | Coordinates (Angstroms) |   |   |
|---------------|---------------|-------------|-------------------------|---|---|
|               |               |             | X                       | Y | Z |

|    |   |   |           |           |           |
|----|---|---|-----------|-----------|-----------|
| 1  | 6 | 0 | 1.324666  | -0.005728 | 0.660475  |
| 2  | 1 | 0 | 0.725735  | -0.646394 | 1.324663  |
| 3  | 1 | 0 | 2.097399  | 0.468217  | 1.272910  |
| 4  | 6 | 0 | 0.436670  | 1.090258  | 0.099037  |
| 5  | 1 | 0 | 0.014766  | 1.698379  | 0.906124  |
| 6  | 1 | 0 | 1.005077  | 1.729829  | -0.575781 |
| 7  | 7 | 0 | -0.662220 | 0.530617  | -0.734307 |
| 8  | 7 | 0 | -1.522238 | -0.100269 | -0.109973 |
| 9  | 7 | 0 | -2.393797 | -0.703584 | 0.350552  |
| 10 | 7 | 0 | 1.972747  | -0.737902 | -0.428722 |
| 11 | 1 | 0 | 2.562352  | -1.469636 | -0.042932 |
| 12 | 1 | 0 | 1.265215  | -1.209603 | -0.984907 |

-----  
***ggg***, E = -298.1510493 a.u.  
 -----

| Center<br>Number | Atomic<br>Number | Atomic<br>Type | Coordinates (Angstroms) |           |           |
|------------------|------------------|----------------|-------------------------|-----------|-----------|
|                  |                  |                | X                       | Y         | Z         |
| 1                | 6                | 0              | 1.279349                | -0.061932 | 0.638882  |
| 2                | 1                | 0              | 0.664587                | -0.662200 | 1.317379  |
| 3                | 1                | 0              | 2.119626                | 0.332686  | 1.227410  |
| 4                | 6                | 0              | 0.479182                | 1.136904  | 0.155359  |
| 5                | 1                | 0              | 0.180076                | 1.751091  | 1.011659  |
| 6                | 1                | 0              | 1.073538                | 1.752917  | -0.520961 |
| 7                | 7                | 0              | -0.725777               | 0.764697  | -0.628776 |
| 8                | 7                | 0              | -1.461931               | -0.073994 | -0.103797 |
| 9                | 7                | 0              | -2.229044               | -0.853325 | 0.271618  |
| 10               | 7                | 0              | 1.685203                | -0.910903 | -0.481105 |
| 11               | 1                | 0              | 2.329353                | -0.398767 | -1.077717 |
| 12               | 1                | 0              | 2.202480                | -1.710885 | -0.128803 |

-----  
***gga***, E = -298.1516445 a.u.  
 -----

| Center<br>Number | Atomic<br>Number | Atomic<br>Type | Coordinates (Angstroms) |           |           |
|------------------|------------------|----------------|-------------------------|-----------|-----------|
|                  |                  |                | X                       | Y         | Z         |
| 1                | 6                | 0              | 1.686522                | -0.129976 | -0.120177 |
| 2                | 1                | 0              | 1.914255                | -0.376784 | -1.160704 |
| 3                | 1                | 0              | 2.577464                | -0.355450 | 0.475314  |
| 4                | 6                | 0              | 0.568179                | -1.047326 | 0.370011  |
| 5                | 1                | 0              | 0.868780                | -2.091613 | 0.267360  |
| 6                | 1                | 0              | 0.338718                | -0.848476 | 1.423197  |
| 7                | 7                | 0              | -0.661697               | -0.900749 | -0.448646 |
| 8                | 7                | 0              | -1.457251               | -0.031509 | -0.078151 |
| 9                | 7                | 0              | -2.299544               | 0.718296  | 0.175197  |
| 10               | 7                | 0              | 1.415746                | 1.301562  | -0.038950 |
| 11               | 1                | 0              | 0.665144                | 1.562062  | -0.670004 |
| 12               | 1                | 0              | 1.126656                | 1.560864  | 0.899685  |

-----  
***ggg***, E = -298.151703 a.u.  
 -----

| Center<br>Number | Atomic<br>Number | Atomic<br>Type | Coordinates (Angstroms) |           |           |
|------------------|------------------|----------------|-------------------------|-----------|-----------|
|                  |                  |                | X                       | Y         | Z         |
| 1                | 6                | 0              | 1.671630                | -0.124268 | -0.098625 |

|    |   |   |           |           |           |
|----|---|---|-----------|-----------|-----------|
| 2  | 1 | 0 | 1.957446  | -0.364588 | -1.130639 |
| 3  | 1 | 0 | 2.541713  | -0.301598 | 0.540500  |
| 4  | 6 | 0 | 0.575054  | -1.077921 | 0.345730  |
| 5  | 1 | 0 | 0.881377  | -2.112555 | 0.185875  |
| 6  | 1 | 0 | 0.346670  | -0.928915 | 1.406119  |
| 7  | 7 | 0 | -0.657015 | -0.897153 | -0.464229 |
| 8  | 7 | 0 | -1.439798 | -0.026601 | -0.070192 |
| 9  | 7 | 0 | -2.271643 | 0.729167  | 0.198761  |
| 10 | 7 | 0 | 1.235288  | 1.264503  | 0.073071  |
| 11 | 1 | 0 | 2.043904  | 1.878013  | 0.081302  |
| 12 | 1 | 0 | 0.680959  | 1.553364  | -0.727665 |

-----  
*g<sup>-</sup>gg<sup>-</sup>*, E = -298.1524594 a.u.

| Center<br>Number | Atomic<br>Number | Atomic<br>Type | Coordinates (Angstroms) |           |           |
|------------------|------------------|----------------|-------------------------|-----------|-----------|
|                  |                  |                | X                       | Y         | Z         |
| 1                | 6                | 0              | 1.620390                | -0.116887 | -0.209676 |
| 2                | 1                | 0              | 1.690604                | -0.281616 | -1.287959 |
| 3                | 1                | 0              | 2.594130                | -0.367819 | 0.234926  |
| 4                | 6                | 0              | 0.590140                | -1.076638 | 0.362854  |
| 5                | 1                | 0              | 0.921929                | -2.106812 | 0.230541  |
| 6                | 1                | 0              | 0.445899                | -0.893543 | 1.434571  |
| 7                | 7                | 0              | -0.709230               | -0.989886 | -0.341099 |
| 8                | 7                | 0              | -1.423882               | -0.019751 | -0.071289 |
| 9                | 7                | 0              | -2.217872               | 0.802352  | 0.099438  |
| 10               | 7                | 0              | 1.202399                | 1.266382  | 0.020927  |
| 11               | 1                | 0              | 1.315955                | 1.497601  | 1.004249  |
| 12               | 1                | 0              | 1.808402                | 1.899658  | -0.491237 |

## 2-Azidoethylammonium ion

*aa*, E = -298.5986324 a.u.

| Center<br>Number | Atomic<br>Number | Atomic<br>Type | Coordinates (Angstroms) |           |           |
|------------------|------------------|----------------|-------------------------|-----------|-----------|
|                  |                  |                | X                       | Y         | Z         |
| 1                | 6                | 0              | 1.480112                | 0.533831  | -0.049335 |
| 2                | 1                | 0              | 1.545212                | 1.232773  | 0.783113  |
| 3                | 1                | 0              | 1.483256                | 1.079035  | -0.991606 |
| 4                | 6                | 0              | 0.248090                | -0.345068 | 0.069320  |
| 5                | 1                | 0              | 0.184218                | -1.032172 | -0.781300 |
| 6                | 1                | 0              | 0.271333                | -0.922668 | 0.999861  |
| 7                | 7                | 0              | -0.893379               | 0.588627  | 0.072938  |
| 8                | 7                | 0              | -2.004668               | 0.048493  | -0.001470 |
| 9                | 7                | 0              | -3.094188               | -0.321729 | -0.065098 |
| 10               | 7                | 0              | 2.715112                | -0.307281 | -0.019333 |
| 11               | 1                | 0              | 2.808355                | -0.817130 | 0.862303  |
| 12               | 1                | 0              | 2.723545                | -0.996289 | -0.775221 |
| 13               | 1                | 0              | 3.554732                | 0.267100  | -0.126316 |

-----  
*ag*, E = -298.5985211 a.u.

| Center<br>Number | Atomic<br>Number | Atomic<br>Type | Coordinates (Angstroms) |   |   |
|------------------|------------------|----------------|-------------------------|---|---|
|                  |                  |                | X                       | Y | Z |



|    |   |   |           |           |           |
|----|---|---|-----------|-----------|-----------|
| 1  | 6 | 0 | 1.149971  | -0.312178 | -0.403880 |
| 2  | 1 | 0 | 1.232269  | -0.095149 | -1.467777 |
| 3  | 1 | 0 | 0.728377  | -1.307105 | -0.263863 |
| 4  | 6 | 0 | 0.321094  | 0.753784  | 0.303673  |
| 5  | 1 | 0 | 0.229804  | 0.535649  | 1.372916  |
| 6  | 1 | 0 | 0.776038  | 1.736864  | 0.181198  |
| 7  | 7 | 0 | -1.005590 | 0.847408  | -0.330038 |
| 8  | 7 | 0 | -1.804543 | -0.048801 | -0.018157 |
| 9  | 7 | 0 | -2.653373 | -0.801215 | 0.187496  |
| 10 | 7 | 0 | 2.539865  | -0.346555 | 0.149893  |
| 11 | 1 | 0 | 3.026289  | 0.542473  | 0.007904  |
| 12 | 1 | 0 | 2.547557  | -0.546917 | 1.153195  |
| 13 | 1 | 0 | 3.098760  | -1.071308 | -0.306682 |

**ga**, E = -298.6032676 a.u.

| Center<br>Number | Atomic<br>Number | Atomic<br>Type | Coordinates (Angstroms) |           |           |
|------------------|------------------|----------------|-------------------------|-----------|-----------|
|                  |                  |                | X                       | Y         | Z         |
| 1                | 6                | 0              | -1.684750               | 0.580787  | -0.190551 |
| 2                | 1                | 0              | -1.788964               | 0.689460  | -1.269086 |
| 3                | 1                | 0              | -2.391584               | 1.234143  | 0.318265  |
| 4                | 6                | 0              | -0.266337               | 0.859414  | 0.253963  |
| 5                | 1                | 0              | 0.004961                | 1.874372  | -0.050335 |
| 6                | 1                | 0              | -0.173169               | 0.773735  | 1.341982  |
| 7                | 7                | 0              | 0.582168                | -0.145018 | -0.422967 |
| 8                | 7                | 0              | 1.770120                | -0.150686 | -0.075308 |
| 9                | 7                | 0              | 2.893224                | -0.252963 | 0.159268  |
| 10               | 7                | 0              | -2.042031               | -0.831847 | 0.141084  |
| 11               | 1                | 0              | -1.342930               | -1.469659 | -0.252273 |
| 12               | 1                | 0              | -2.069085               | -0.989606 | 1.151117  |
| 13               | 1                | 0              | -2.957073               | -1.090045 | -0.234679 |

**gg**, E = -298.6023669 a.u.

| Center<br>Number | Atomic<br>Number | Atomic<br>Type | Coordinates (Angstroms) |           |           |
|------------------|------------------|----------------|-------------------------|-----------|-----------|
|                  |                  |                | X                       | Y         | Z         |
| 1                | 6                | 0              | 1.301280                | 0.153715  | 0.718438  |
| 2                | 1                | 0              | 0.778428                | -0.474627 | 1.439174  |
| 3                | 1                | 0              | 2.089363                | 0.710159  | 1.224841  |
| 4                | 6                | 0              | 0.347541                | 1.088340  | -0.005588 |
| 5                | 1                | 0              | -0.126202               | 1.749500  | 0.725210  |
| 6                | 1                | 0              | 0.879199                | 1.699587  | -0.735529 |
| 7                | 7                | 0              | -0.654728               | 0.320830  | -0.777035 |
| 8                | 7                | 0              | -1.597969               | -0.130456 | -0.108273 |
| 9                | 7                | 0              | -2.532568               | -0.592562 | 0.383043  |
| 10               | 7                | 0              | 1.951318                | -0.763585 | -0.267264 |
| 11               | 1                | 0              | 1.242453                | -1.240281 | -0.832857 |
| 12               | 1                | 0              | 2.566221                | -0.257515 | -0.908733 |
| 13               | 1                | 0              | 2.515237                | -1.478745 | 0.197491  |

## 2-Azidoethanol

*aaa*, E = -318.0016906 a.u.

| Center<br>Number | Atomic<br>Number | Atomic<br>Type | Coordinates (Angstroms) |           |           |
|------------------|------------------|----------------|-------------------------|-----------|-----------|
|                  |                  |                | X                       | Y         | Z         |
| 1                | 6                | 0              | -1.583430               | 0.475376  | -0.082047 |
| 2                | 1                | 0              | -1.556153               | 0.976955  | -1.054604 |
| 3                | 1                | 0              | -1.629156               | 1.233516  | 0.707305  |
| 4                | 6                | 0              | -0.332892               | -0.360823 | 0.095884  |
| 5                | 1                | 0              | -0.389809               | -0.922769 | 1.033699  |
| 6                | 1                | 0              | -0.223634               | -1.060332 | -0.738687 |
| 7                | 7                | 0              | 0.811207                | 0.578650  | 0.139013  |
| 8                | 7                | 0              | 1.923576                | 0.061722  | -0.000138 |
| 9                | 7                | 0              | 3.015288                | -0.296378 | -0.112976 |
| 10               | 1                | 0              | -3.475475               | 0.067230  | -0.238726 |
| 11               | 8                | 0              | -2.684792               | -0.423734 | 0.003337  |

*aag*, E = -318.0020193 a.u.

| Center<br>Number | Atomic<br>Number | Atomic<br>Type | Coordinates (Angstroms) |           |           |
|------------------|------------------|----------------|-------------------------|-----------|-----------|
|                  |                  |                | X                       | Y         | Z         |
| 1                | 6                | 0              | -1.592951               | 0.492112  | -0.050541 |
| 2                | 1                | 0              | -1.568082               | 1.074614  | -0.972424 |
| 3                | 1                | 0              | -1.644519               | 1.181569  | 0.798841  |
| 4                | 6                | 0              | -0.335567               | -0.355029 | 0.055191  |
| 5                | 1                | 0              | -0.365702               | -0.973226 | 0.959467  |
| 6                | 1                | 0              | -0.249056               | -1.005188 | -0.821140 |
| 7                | 7                | 0              | 0.812207                | 0.579508  | 0.126349  |
| 8                | 7                | 0              | 1.924116                | 0.056750  | 0.005472  |
| 9                | 7                | 0              | 3.015497                | -0.307298 | -0.091209 |
| 10               | 1                | 0              | -2.843783               | -0.779775 | 0.720216  |
| 11               | 8                | 0              | -2.752562               | -0.327902 | -0.124642 |

*gaa*, E = -318.0020257 a.u.

| Center<br>Number | Atomic<br>Number | Atomic<br>Type | Coordinates (Angstroms) |           |           |
|------------------|------------------|----------------|-------------------------|-----------|-----------|
|                  |                  |                | X                       | Y         | Z         |
| 1                | 6                | 0              | -1.222013               | -0.345788 | 0.360054  |
| 2                | 1                | 0              | -1.289741               | -0.176626 | 1.439676  |
| 3                | 1                | 0              | -0.722865               | -1.306168 | 0.183714  |
| 4                | 6                | 0              | -0.420637               | 0.778988  | -0.273730 |
| 5                | 1                | 0              | -0.348889               | 0.634037  | -1.356619 |
| 6                | 1                | 0              | -0.896233               | 1.738478  | -0.073984 |
| 7                | 7                | 0              | 0.929442                | 0.868059  | 0.326201  |
| 8                | 7                | 0              | 1.707532                | -0.043278 | 0.019786  |
| 9                | 7                | 0              | 2.539286                | -0.816638 | -0.189755 |
| 10               | 1                | 0              | -3.055102               | -0.968418 | 0.205471  |
| 11               | 8                | 0              | -2.508137               | -0.322188 | -0.251228 |

*gag*, E = -318.0023316 a.u.

| Center<br>Number | Atomic<br>Number | Atomic<br>Type | Coordinates (Angstroms) |   |   |
|------------------|------------------|----------------|-------------------------|---|---|
|                  |                  |                | X                       | Y | Z |

|    |   |   |           |           |           |
|----|---|---|-----------|-----------|-----------|
| 1  | 6 | 0 | 1.224686  | -0.336646 | -0.390570 |
| 2  | 1 | 0 | 1.287083  | -0.130013 | -1.459931 |
| 3  | 1 | 0 | 0.724834  | -1.302460 | -0.251344 |
| 4  | 6 | 0 | 0.427473  | 0.768914  | 0.293202  |
| 5  | 1 | 0 | 0.362423  | 0.589175  | 1.372473  |
| 6  | 1 | 0 | 0.906293  | 1.732928  | 0.125082  |
| 7  | 7 | 0 | -0.928982 | 0.884649  | -0.288625 |
| 8  | 7 | 0 | -1.706151 | -0.038201 | -0.015976 |
| 9  | 7 | 0 | -2.538312 | -0.818048 | 0.167246  |
| 10 | 1 | 0 | 2.527560  | -0.651505 | 1.015428  |
| 11 | 8 | 0 | 2.561621  | -0.378817 | 0.092998  |

*gag*<sup>-</sup>, E = -318.0023218 a.u.

| Center Number | Atomic Number | Atomic Type | Coordinates (Angstroms) |           |           |
|---------------|---------------|-------------|-------------------------|-----------|-----------|
|               |               |             | X                       | Y         | Z         |
| 1             | 6             | 0           | -1.214669               | -0.369888 | 0.357948  |
| 2             | 1             | 0           | -1.260022               | -0.211940 | 1.440610  |
| 3             | 1             | 0           | -0.718816               | -1.324316 | 0.167534  |
| 4             | 6             | 0           | -0.428278               | 0.764906  | -0.289809 |
| 5             | 1             | 0           | -0.360083               | 0.609594  | -1.371413 |
| 6             | 1             | 0           | -0.913142               | 1.723411  | -0.101404 |
| 7             | 7             | 0           | 0.922580                | 0.882884  | 0.305523  |
| 8             | 7             | 0           | 1.708181                | -0.028921 | 0.020569  |
| 9             | 7             | 0           | 2.545907                | -0.800511 | -0.172014 |
| 10            | 1             | 0           | -3.007495               | 0.306767  | 0.043201  |
| 11            | 8             | 0           | -2.514930               | -0.480974 | -0.208238 |

*aga*, E = -318.0033601 a.u.

| Center Number | Atomic Number | Atomic Type | Coordinates (Angstroms) |           |           |
|---------------|---------------|-------------|-------------------------|-----------|-----------|
|               |               |             | X                       | Y         | Z         |
| 1             | 6             | 0           | 1.736587                | 0.465346  | 0.194600  |
| 2             | 1             | 0           | 1.777256                | 0.544331  | 1.286145  |
| 3             | 1             | 0           | 2.395765                | 1.225115  | -0.240195 |
| 4             | 6             | 0           | 0.329865                | 0.736264  | -0.276307 |
| 5             | 1             | 0           | 0.075864                | 1.784482  | -0.086117 |
| 6             | 1             | 0           | 0.253232                | 0.535130  | -1.350245 |
| 7             | 7             | 0           | -0.595033               | -0.146660 | 0.475308  |
| 8             | 7             | 0           | -1.765387               | -0.138465 | 0.084014  |
| 9             | 7             | 0           | -2.885923               | -0.220205 | -0.184092 |
| 10            | 1             | 0           | 2.959188                | -1.043640 | 0.160899  |
| 11            | 8             | 0           | 2.108049                | -0.839721 | -0.238357 |

*agg*, E = -318.0032141 a.u.

| Center Number | Atomic Number | Atomic Type | Coordinates (Angstroms) |          |           |
|---------------|---------------|-------------|-------------------------|----------|-----------|
|               |               |             | X                       | Y        | Z         |
| 1             | 6             | 0           | -1.751429               | 0.457467 | -0.167869 |
| 2             | 1             | 0           | -1.820435               | 0.622614 | -1.244426 |
| 3             | 1             | 0           | -2.427059               | 1.157773 | 0.336257  |

|    |   |   |           |           |           |
|----|---|---|-----------|-----------|-----------|
| 4  | 6 | 0 | -0.339636 | 0.742684  | 0.299640  |
| 5  | 1 | 0 | -0.120901 | 1.808643  | 0.169326  |
| 6  | 1 | 0 | -0.230523 | 0.487396  | 1.360158  |
| 7  | 7 | 0 | 0.596914  | -0.065404 | -0.516077 |
| 8  | 7 | 0 | 1.753502  | -0.124457 | -0.089666 |
| 9  | 7 | 0 | 2.863352  | -0.256269 | 0.201384  |
| 10 | 1 | 0 | -2.148091 | -1.038534 | 1.002976  |
| 11 | 8 | 0 | -2.150371 | -0.889486 | 0.051949  |

-----  
**agg<sup>-</sup>**, E = -318.0051665 a.u.  
 -----

| Center<br>Number | Atomic<br>Number | Atomic<br>Type | Coordinates (Angstroms) |           |           |
|------------------|------------------|----------------|-------------------------|-----------|-----------|
|                  |                  |                | X                       | Y         | Z         |
| 1                | 6                | 0              | 1.773161                | 0.425975  | 0.145928  |
| 2                | 1                | 0              | 1.898783                | 0.574648  | 1.224434  |
| 3                | 1                | 0              | 2.490138                | 1.056925  | -0.381834 |
| 4                | 6                | 0              | 0.369737                | 0.823479  | -0.257449 |
| 5                | 1                | 0              | 0.187091                | 1.877414  | -0.023313 |
| 6                | 1                | 0              | 0.225918                | 0.651790  | -1.328928 |
| 7                | 7                | 0              | -0.556916               | -0.035754 | 0.523301  |
| 8                | 7                | 0              | -1.708864               | -0.112355 | 0.085198  |
| 9                | 7                | 0              | -2.812301               | -0.259448 | -0.219732 |
| 10               | 1                | 0              | 1.384068                | -1.461051 | 0.199127  |
| 11               | 8                | 0              | 2.062897                | -0.917943 | -0.217716 |

-----  
**gga**, E = -318.0033804 a.u.  
 -----

| Center<br>Number | Atomic<br>Number | Atomic<br>Type | Coordinates (Angstroms) |           |           |
|------------------|------------------|----------------|-------------------------|-----------|-----------|
|                  |                  |                | X                       | Y         | Z         |
| 1                | 6                | 0              | 1.309960                | -0.112218 | 0.630325  |
| 2                | 1                | 0              | 0.695330                | -0.838340 | 1.175987  |
| 3                | 1                | 0              | 2.081304                | 0.266236  | 1.311510  |
| 4                | 6                | 0              | 0.458832                | 1.057897  | 0.185896  |
| 5                | 1                | 0              | 0.092168                | 1.599698  | 1.064488  |
| 6                | 1                | 0              | 1.047519                | 1.738567  | -0.428661 |
| 7                | 7                | 0              | -0.682441               | 0.647609  | -0.668146 |
| 8                | 7                | 0              | -1.516983               | -0.076742 | -0.116422 |
| 9                | 7                | 0              | -2.367522               | -0.753782 | 0.275297  |
| 10               | 1                | 0              | 2.317651                | -1.520406 | -0.247102 |
| 11               | 8                | 0              | 1.890238                | -0.704927 | -0.526082 |

-----  
**ggg**, E = -318.0035865 a.u.  
 -----

| Center<br>Number | Atomic<br>Number | Atomic<br>Type | Coordinates (Angstroms) |           |           |
|------------------|------------------|----------------|-------------------------|-----------|-----------|
|                  |                  |                | X                       | Y         | Z         |
| 1                | 6                | 0              | 1.303872                | -0.126116 | 0.636230  |
| 2                | 1                | 0              | 0.687364                | -0.788732 | 1.248438  |
| 3                | 1                | 0              | 2.132042                | 0.236292  | 1.256686  |
| 4                | 6                | 0              | 0.493345                | 1.075901  | 0.180465  |
| 5                | 1                | 0              | 0.163598                | 1.646040  | 1.056768  |
| 6                | 1                | 0              | 1.094407                | 1.729026  | -0.453212 |
| 7                | 7                | 0              | -0.675017               | 0.702046  | -0.651513 |

|    |   |   |           |           |           |
|----|---|---|-----------|-----------|-----------|
| 8  | 7 | 0 | -1.487479 | -0.056430 | -0.113214 |
| 9  | 7 | 0 | -2.322115 | -0.758406 | 0.268968  |
| 10 | 1 | 0 | 2.346421  | -0.365932 | -0.983281 |
| 11 | 8 | 0 | 1.773142  | -0.920734 | -0.444407 |

-----  
***ggg***, E = -318.0047786 a.u.  
 -----

| Center<br>Number | Atomic<br>Number | Atomic<br>Type | Coordinates (Angstroms) |           |           |
|------------------|------------------|----------------|-------------------------|-----------|-----------|
|                  |                  |                | X                       | Y         | Z         |
| 1                | 6                | 0              | 1.348709                | -0.054034 | 0.658528  |
| 2                | 1                | 0              | 0.756472                | -0.716523 | 1.302351  |
| 3                | 1                | 0              | 2.141807                | 0.392360  | 1.261787  |
| 4                | 6                | 0              | 0.467440                | 1.048742  | 0.100721  |
| 5                | 1                | 0              | 0.050208                | 1.655445  | 0.911805  |
| 6                | 1                | 0              | 1.043013                | 1.686309  | -0.569686 |
| 7                | 7                | 0              | -0.622910               | 0.486281  | -0.738492 |
| 8                | 7                | 0              | -1.525646               | -0.081891 | -0.111357 |
| 9                | 7                | 0              | -2.435565               | -0.623883 | 0.349305  |
| 10               | 1                | 0              | 1.292331                | -1.117676 | -0.956138 |
| 11               | 8                | 0              | 1.988515                | -0.791464 | -0.375226 |

-----  
***g-ga***, E = -318.0052708 a.u.  
 -----

| Center<br>Number | Atomic<br>Number | Atomic<br>Type | Coordinates (Angstroms) |           |           |
|------------------|------------------|----------------|-------------------------|-----------|-----------|
|                  |                  |                | X                       | Y         | Z         |
| 1                | 6                | 0              | 1.609351                | -0.020478 | -0.200778 |
| 2                | 1                | 0              | 1.700485                | -0.141963 | -1.285151 |
| 3                | 1                | 0              | 2.591882                | -0.169590 | 0.262151  |
| 4                | 6                | 0              | 0.652651                | -1.056842 | 0.345530  |
| 5                | 1                | 0              | 1.048188                | -2.056454 | 0.166071  |
| 6                | 1                | 0              | 0.517768                | -0.916234 | 1.423569  |
| 7                | 7                | 0              | -0.657356               | -1.017470 | -0.341277 |
| 8                | 7                | 0              | -1.388615               | -0.059639 | -0.066450 |
| 9                | 7                | 0              | -2.189599               | 0.754772  | 0.104724  |
| 10               | 1                | 0              | 1.624435                | 1.922920  | -0.304556 |
| 11               | 8                | 0              | 1.074277                | 1.260200  | 0.123803  |

-----  
***g-gg***, E = -318.0051014 a.u.  
 -----

| Center<br>Number | Atomic<br>Number | Atomic<br>Type | Coordinates (Angstroms) |           |           |
|------------------|------------------|----------------|-------------------------|-----------|-----------|
|                  |                  |                | X                       | Y         | Z         |
| 1                | 6                | 0              | 1.602424                | -0.009868 | -0.231407 |
| 2                | 1                | 0              | 1.665420                | -0.149533 | -1.311713 |
| 3                | 1                | 0              | 2.600214                | -0.142727 | 0.202386  |
| 4                | 6                | 0              | 0.662888                | -1.045986 | 0.360058  |
| 5                | 1                | 0              | 1.064893                | -2.047301 | 0.200742  |
| 6                | 1                | 0              | 0.539693                | -0.884776 | 1.437514  |
| 7                | 7                | 0              | -0.656804               | -1.034922 | -0.306745 |
| 8                | 7                | 0              | -1.386554               | -0.067899 | -0.061680 |
| 9                | 7                | 0              | -2.188931               | 0.749678  | 0.088792  |
| 10               | 1                | 0              | 1.205643                | 1.514195  | 0.906694  |
| 11               | 8                | 0              | 1.119787                | 1.314659  | -0.031262 |

-----  
**Protonated 2-azidoethanol**

*aaa*, E = -318.3950331 a.u.

-----

| Center<br>Number | Atomic<br>Number | Atomic<br>Type | Coordinates (Angstroms) |           |           |
|------------------|------------------|----------------|-------------------------|-----------|-----------|
|                  |                  |                | X                       | Y         | Z         |
| 1                | 6                | 0              | -1.460695               | 0.534068  | 0.103773  |
| 2                | 1                | 0              | -1.573957               | 1.288510  | -0.669790 |
| 3                | 1                | 0              | -1.471382               | 0.983010  | 1.092884  |
| 4                | 6                | 0              | -0.262542               | -0.364435 | -0.128796 |
| 5                | 1                | 0              | -0.165313               | -1.097588 | 0.677169  |
| 6                | 1                | 0              | -0.345926               | -0.880476 | -1.090201 |
| 7                | 7                | 0              | 0.873837                | 0.573861  | -0.141429 |
| 8                | 7                | 0              | 1.984741                | 0.045574  | 0.000766  |
| 9                | 7                | 0              | 3.072790                | -0.312437 | 0.119796  |
| 10               | 1                | 0              | -2.902899               | -0.669372 | -0.814391 |
| 11               | 1                | 0              | -2.842641               | -0.894599 | 0.755014  |
| 12               | 8                | 0              | -2.734754               | -0.237034 | 0.043190  |

-----

*aag*, E = -318.3953944 a.u.

-----

| Center<br>Number | Atomic<br>Number | Atomic<br>Type | Coordinates (Angstroms) |           |           |
|------------------|------------------|----------------|-------------------------|-----------|-----------|
|                  |                  |                | X                       | Y         | Z         |
| 1                | 6                | 0              | -1.457020               | 0.530934  | 0.080711  |
| 2                | 1                | 0              | -1.575770               | 1.247412  | -0.728444 |
| 3                | 1                | 0              | -1.466699               | 1.014663  | 1.052913  |
| 4                | 6                | 0              | -0.259749               | -0.376045 | -0.100886 |
| 5                | 1                | 0              | -0.155997               | -1.038478 | 0.762461  |
| 6                | 1                | 0              | -0.356613               | -0.971918 | -1.013865 |
| 7                | 7                | 0              | 0.875324                | 0.556699  | -0.212657 |
| 8                | 7                | 0              | 1.985759                | 0.049733  | -0.005222 |
| 9                | 7                | 0              | 3.073383                | -0.290498 | 0.160708  |
| 10               | 1                | 0              | -3.447455               | 0.083195  | 0.485586  |
| 11               | 1                | 0              | -2.912888               | -0.686278 | -0.787503 |
| 12               | 8                | 0              | -2.665653               | -0.348684 | 0.093763  |

-----

*gaa*, E = -318.3952158 a.u.

-----

| Center<br>Number | Atomic<br>Number | Atomic<br>Type | Coordinates (Angstroms) |           |           |
|------------------|------------------|----------------|-------------------------|-----------|-----------|
|                  |                  |                | X                       | Y         | Z         |
| 1                | 6                | 0              | 1.169850                | -0.266679 | -0.453387 |
| 2                | 1                | 0              | 1.332420                | 0.072804  | -1.472441 |
| 3                | 1                | 0              | 0.784194                | -1.283267 | -0.438031 |
| 4                | 6                | 0              | 0.331890                | 0.706427  | 0.360262  |
| 5                | 1                | 0              | 0.219305                | 0.367174  | 1.393973  |
| 6                | 1                | 0              | 0.774668                | 1.701779  | 0.352531  |
| 7                | 7                | 0              | -0.971356               | 0.832002  | -0.314980 |
| 8                | 7                | 0              | -1.804302               | -0.041352 | -0.021109 |
| 9                | 7                | 0              | -2.681604               | -0.763410 | 0.167589  |
| 10               | 1                | 0              | 3.085450                | 0.402295  | 0.078357  |
| 11               | 1                | 0              | 2.585447                | -0.785149 | 1.003338  |

-----

12 8 0 2.551114 -0.413101 0.102566

*gag*, E = -318.3954753 a.u.

| Center<br>Number | Atomic<br>Number | Atomic<br>Type | Coordinates (Angstroms) |           |           |
|------------------|------------------|----------------|-------------------------|-----------|-----------|
|                  |                  |                | X                       | Y         | Z         |
| 1                | 6                | 0              | -1.154490               | -0.275619 | 0.431747  |
| 2                | 1                | 0              | -1.320747               | -0.004673 | 1.471507  |
| 3                | 1                | 0              | -0.755413               | -1.282514 | 0.338522  |
| 4                | 6                | 0              | -0.329669               | 0.748015  | -0.326836 |
| 5                | 1                | 0              | -0.238327               | 0.466932  | -1.379181 |
| 6                | 1                | 0              | -0.771675               | 1.741045  | -0.251797 |
| 7                | 7                | 0              | 0.984047                | 0.837641  | 0.334274  |
| 8                | 7                | 0              | 1.793280                | -0.050570 | 0.019222  |
| 9                | 7                | 0              | 2.650229                | -0.792236 | -0.187309 |
| 10               | 1                | 0              | -2.969880               | -1.188959 | -0.026393 |
| 11               | 1                | 0              | -3.083799               | 0.385400  | -0.037406 |
| 12               | 8                | 0              | -2.493512               | -0.364432 | -0.238503 |

*gag*<sup>-</sup>, E = -318.3956429 a.u.

| Center<br>Number | Atomic<br>Number | Atomic<br>Type | Coordinates (Angstroms) |           |           |
|------------------|------------------|----------------|-------------------------|-----------|-----------|
|                  |                  |                | X                       | Y         | Z         |
| 1                | 6                | 0              | 1.174159                | -0.267475 | -0.440487 |
| 2                | 1                | 0              | 1.341257                | 0.073389  | -1.458499 |
| 3                | 1                | 0              | 0.805476                | -1.290882 | -0.416129 |
| 4                | 6                | 0              | 0.325050                | 0.710787  | 0.350438  |
| 5                | 1                | 0              | 0.210003                | 0.391405  | 1.390204  |
| 6                | 1                | 0              | 0.776146                | 1.701452  | 0.322932  |
| 7                | 7                | 0              | -0.976884               | 0.821573  | -0.328792 |
| 8                | 7                | 0              | -1.808486               | -0.049275 | -0.025021 |
| 9                | 7                | 0              | -2.684670               | -0.771009 | 0.170366  |
| 10               | 1                | 0              | 2.599357                | -0.793272 | 0.999113  |
| 11               | 1                | 0              | 3.233907                | -0.585767 | -0.432287 |
| 12               | 8                | 0              | 2.541111                | -0.270652 | 0.177385  |

*aga*, E = -318.4016294 a.u.

| Center<br>Number | Atomic<br>Number | Atomic<br>Type | Coordinates (Angstroms) |           |           |
|------------------|------------------|----------------|-------------------------|-----------|-----------|
|                  |                  |                | X                       | Y         | Z         |
| 1                | 6                | 0              | -1.734825               | 0.532579  | -0.147776 |
| 2                | 1                | 0              | -1.925248               | 0.650867  | -1.210690 |
| 3                | 1                | 0              | -2.503776               | 1.009871  | 0.452477  |
| 4                | 6                | 0              | -0.326588               | 0.917319  | 0.239067  |
| 5                | 1                | 0              | -0.124515               | 1.929067  | -0.123108 |
| 6                | 1                | 0              | -0.187499               | 0.876729  | 1.322994  |
| 7                | 7                | 0              | 0.519055                | -0.088893 | -0.440469 |
| 8                | 7                | 0              | 1.703922                | -0.122077 | -0.073402 |
| 9                | 7                | 0              | 2.820659                | -0.237193 | 0.173555  |
| 10               | 1                | 0              | -1.008318               | -1.346872 | -0.145208 |
| 11               | 1                | 0              | -2.123178               | -1.178576 | 0.983391  |
| 12               | 8                | 0              | -1.883055               | -0.937917 | 0.069326  |

-----  
**agg**, E = -318.402537 a.u.  
-----

| Center<br>Number | Atomic<br>Number | Atomic<br>Type | Coordinates (Angstroms) |           |           |
|------------------|------------------|----------------|-------------------------|-----------|-----------|
|                  |                  |                | X                       | Y         | Z         |
| 1                | 6                | 0              | -1.727943               | 0.541171  | -0.160187 |
| 2                | 1                | 0              | -1.904902               | 0.596801  | -1.232036 |
| 3                | 1                | 0              | -2.483157               | 1.068788  | 0.414403  |
| 4                | 6                | 0              | -0.318455               | 0.914313  | 0.221552  |
| 5                | 1                | 0              | -0.101767               | 1.915824  | -0.159274 |
| 6                | 1                | 0              | -0.194195               | 0.892358  | 1.307715  |
| 7                | 7                | 0              | 0.521735                | -0.116237 | -0.428170 |
| 8                | 7                | 0              | 1.711024                | -0.130551 | -0.075036 |
| 9                | 7                | 0              | 2.830984                | -0.234750 | 0.162606  |
| 10               | 1                | 0              | -2.639086               | -1.336999 | -0.129292 |
| 11               | 1                | 0              | -1.033978               | -1.353025 | -0.072720 |
| 12               | 8                | 0              | -1.851341               | -0.893235 | 0.235901  |

-----  
**agg**<sup>-</sup>, E = -318.3989511 a.u.  
-----

| Center<br>Number | Atomic<br>Number | Atomic<br>Type | Coordinates (Angstroms) |           |           |
|------------------|------------------|----------------|-------------------------|-----------|-----------|
|                  |                  |                | X                       | Y         | Z         |
| 1                | 6                | 0              | -1.659204               | 0.583900  | -0.195853 |
| 2                | 1                | 0              | -1.733749               | 0.648305  | -1.277966 |
| 3                | 1                | 0              | -2.364824               | 1.244313  | 0.302797  |
| 4                | 6                | 0              | -0.255508               | 0.772164  | 0.300431  |
| 5                | 1                | 0              | -0.005554               | 1.825969  | 0.131957  |
| 6                | 1                | 0              | -0.189160               | 0.571462  | 1.375418  |
| 7                | 7                | 0              | 0.625052                | -0.118338 | -0.472726 |
| 8                | 7                | 0              | 1.801039                | -0.146119 | -0.085919 |
| 9                | 7                | 0              | 2.917907                | -0.266982 | 0.169185  |
| 10               | 1                | 0              | -2.101468               | -1.029241 | 1.053466  |
| 11               | 1                | 0              | -2.941329               | -1.056384 | -0.282598 |
| 12               | 8                | 0              | -2.072954               | -0.827592 | 0.099460  |

-----  
**gga**, E = -318.4004896 a.u.  
-----

| Center<br>Number | Atomic<br>Number | Atomic<br>Type | Coordinates (Angstroms) |           |           |
|------------------|------------------|----------------|-------------------------|-----------|-----------|
|                  |                  |                | X                       | Y         | Z         |
| 1                | 6                | 0              | 1.431130                | 0.395495  | 0.623288  |
| 2                | 1                | 0              | 1.034545                | 0.087784  | 1.587472  |
| 3                | 1                | 0              | 2.335732                | 0.987596  | 0.734940  |
| 4                | 6                | 0              | 0.384988                | 1.017022  | -0.281619 |
| 5                | 1                | 0              | -0.120903               | 1.828269  | 0.246956  |
| 6                | 1                | 0              | 0.836913                | 1.405113  | -1.194116 |
| 7                | 7                | 0              | -0.538150               | -0.065430 | -0.698305 |
| 8                | 7                | 0              | -1.601989               | -0.142333 | -0.057817 |
| 9                | 7                | 0              | -2.627297               | -0.304751 | 0.435670  |
| 10               | 1                | 0              | 1.044433                | -1.261558 | -0.450900 |
| 11               | 1                | 0              | 2.552462                | -0.790440 | -0.674882 |
| 12               | 8                | 0              | 1.849020                | -0.893033 | -0.007040 |

-----



**ggg**, E = -318.4013404 a.u.

| Center<br>Number | Atomic<br>Number | Atomic<br>Type | Coordinates (Angstroms) |           |           |
|------------------|------------------|----------------|-------------------------|-----------|-----------|
|                  |                  |                | X                       | Y         | Z         |
| 1                | 6                | 0              | 1.433391                | 0.386638  | 0.619621  |
| 2                | 1                | 0              | 1.043967                | 0.017288  | 1.566697  |
| 3                | 1                | 0              | 2.318894                | 1.002631  | 0.749664  |
| 4                | 6                | 0              | 0.374588                | 1.024769  | -0.254212 |
| 5                | 1                | 0              | -0.129056               | 1.816318  | 0.304875  |
| 6                | 1                | 0              | 0.822946                | 1.442982  | -1.155002 |
| 7                | 7                | 0              | -0.548970               | -0.045191 | -0.700053 |
| 8                | 7                | 0              | -1.605641               | -0.147651 | -0.052219 |
| 9                | 7                | 0              | -2.625747               | -0.331561 | 0.444976  |
| 10               | 1                | 0              | 2.420551                | -1.432788 | 0.343032  |
| 11               | 1                | 0              | 1.072521                | -1.246971 | -0.511470 |
| 12               | 8                | 0              | 1.883102                | -0.799635 | -0.167397 |

**ggg<sup>-</sup>**, E = -318.3982644 a.u.

| Center<br>Number | Atomic<br>Number | Atomic<br>Type | Coordinates (Angstroms) |           |           |
|------------------|------------------|----------------|-------------------------|-----------|-----------|
|                  |                  |                | X                       | Y         | Z         |
| 1                | 6                | 0              | 1.263306                | 0.024150  | 0.727397  |
| 2                | 1                | 0              | 0.733260                | -0.756506 | 1.268190  |
| 3                | 1                | 0              | 2.046516                | 0.470203  | 1.337375  |
| 4                | 6                | 0              | 0.349857                | 1.059673  | 0.119082  |
| 5                | 1                | 0              | -0.077699               | 1.633279  | 0.949013  |
| 6                | 1                | 0              | 0.909818                | 1.749587  | -0.512474 |
| 7                | 7                | 0              | -0.692421               | 0.471119  | -0.736140 |
| 8                | 7                | 0              | -1.603407               | -0.111286 | -0.128290 |
| 9                | 7                | 0              | -2.514111               | -0.673754 | 0.299127  |
| 10               | 1                | 0              | 2.541845                | -0.162987 | -0.912582 |
| 11               | 1                | 0              | 2.413265                | -1.508092 | -0.095073 |
| 12               | 8                | 0              | 1.927948                | -0.716372 | -0.394525 |

**g<sup>-</sup>gg<sup>-</sup>**, E = -318.3986268 a.u.

| Center<br>Number | Atomic<br>Number | Atomic<br>Type | Coordinates (Angstroms) |           |           |
|------------------|------------------|----------------|-------------------------|-----------|-----------|
|                  |                  |                | X                       | Y         | Z         |
| 1                | 6                | 0              | 1.621842                | -0.230298 | -0.180272 |
| 2                | 1                | 0              | 1.717019                | -0.328260 | -1.258012 |
| 3                | 1                | 0              | 2.573183                | -0.370793 | 0.329326  |
| 4                | 6                | 0              | 0.519153                | -1.093430 | 0.378559  |
| 5                | 1                | 0              | 0.849400                | -2.128220 | 0.274299  |
| 6                | 1                | 0              | 0.357851                | -0.893927 | 1.442745  |
| 7                | 7                | 0              | -0.725579               | -0.965755 | -0.394758 |
| 8                | 7                | 0              | -1.460621               | -0.019724 | -0.073127 |
| 9                | 7                | 0              | -2.248323               | 0.797901  | 0.125284  |
| 10               | 1                | 0              | 1.339632                | 1.527316  | 0.923388  |
| 11               | 1                | 0              | 1.664630                | 1.818220  | -0.595524 |
| 12               | 8                | 0              | 1.211747                | 1.203884  | 0.011533  |

## *N*-(2-Azidoethyl)ethanamide

*aag*, E = -450.5143881 a.u.

---

| Center Number | Atomic Number | Atomic Type | Coordinates (Angstroms) |           |           |
|---------------|---------------|-------------|-------------------------|-----------|-----------|
|               |               |             | X                       | Y         | Z         |
| 1             | 6             | 0           | 0.124481                | 0.908233  | -0.577796 |
| 2             | 1             | 0           | -0.165560               | 1.954897  | -0.684342 |
| 3             | 1             | 0           | 0.199320                | 0.459378  | -1.570743 |
| 4             | 6             | 0           | -0.915027               | 0.156529  | 0.242079  |
| 5             | 1             | 0           | -0.601263               | -0.882644 | 0.379225  |
| 6             | 1             | 0           | -1.039690               | 0.632586  | 1.220350  |
| 7             | 7             | 0           | -2.186392               | 0.204952  | -0.519799 |
| 8             | 7             | 0           | -3.182190               | -0.186741 | 0.096675  |
| 9             | 7             | 0           | -4.183545               | -0.525551 | 0.561266  |
| 10            | 7             | 0           | 1.424211                | 0.854132  | 0.059699  |
| 11            | 1             | 0           | 1.709895                | 1.615645  | 0.656849  |
| 12            | 6             | 0           | 2.230351                | -0.232458 | -0.052752 |
| 13            | 6             | 0           | 3.539498                | -0.164173 | 0.696859  |
| 14            | 1             | 0           | 3.686890                | 0.785434  | 1.212992  |
| 15            | 1             | 0           | 3.565169                | -0.977285 | 1.425566  |
| 16            | 1             | 0           | 4.354647                | -0.320116 | -0.012551 |
| 17            | 8             | 0           | 1.913773                | -1.213029 | -0.732821 |

---

*gag*, E = -450.5150715 a.u.

---

| Center Number | Atomic Number | Atomic Type | Coordinates (Angstroms) |           |           |
|---------------|---------------|-------------|-------------------------|-----------|-----------|
|               |               |             | X                       | Y         | Z         |
| 1             | 6             | 0           | 0.102552                | -0.747450 | -0.685175 |
| 2             | 1             | 0           | 0.361430                | -1.573423 | -1.349917 |
| 3             | 1             | 0           | 0.352604                | 0.193728  | -1.182320 |
| 4             | 6             | 0           | 0.879845                | -0.866223 | 0.625850  |
| 5             | 1             | 0           | 0.577163                | -0.072812 | 1.316259  |
| 6             | 1             | 0           | 0.694974                | -1.834574 | 1.090247  |
| 7             | 7             | 0           | 2.340749                | -0.809856 | 0.386682  |
| 8             | 7             | 0           | 2.769817                | 0.296523  | 0.037085  |
| 9             | 7             | 0           | 3.303368                | 1.270037  | -0.282413 |
| 10            | 7             | 0           | -1.326019               | -0.772137 | -0.446635 |
| 11            | 1             | 0           | -1.820890               | -1.649042 | -0.514871 |
| 12            | 6             | 0           | -1.992640               | 0.333760  | -0.026189 |
| 13            | 6             | 0           | -3.470078               | 0.159027  | 0.230636  |
| 14            | 1             | 0           | -3.820403               | -0.855199 | 0.034845  |
| 15            | 1             | 0           | -3.674290               | 0.415821  | 1.272240  |
| 16            | 1             | 0           | -4.017976               | 0.858874  | -0.403684 |
| 17            | 8             | 0           | -1.423262               | 1.418747  | 0.125428  |

---

*gag*<sup>-</sup>, E = -450.5147341 a.u.

---

| Center Number | Atomic Number | Atomic Type | Coordinates (Angstroms) |           |           |
|---------------|---------------|-------------|-------------------------|-----------|-----------|
|               |               |             | X                       | Y         | Z         |
| 1             | 6             | 0           | -0.160779               | -0.350143 | -0.513802 |
| 2             | 1             | 0           | -0.079878               | 0.333635  | -1.361464 |
| 3             | 1             | 0           | -0.731853               | -1.227904 | -0.825409 |

---

|    |   |   |           |           |           |
|----|---|---|-----------|-----------|-----------|
| 4  | 6 | 0 | -0.860046 | 0.360518  | 0.644904  |
| 5  | 1 | 0 | -0.964904 | -0.314802 | 1.500851  |
| 6  | 1 | 0 | -0.283159 | 1.233580  | 0.946343  |
| 7  | 7 | 0 | -2.184654 | 0.879635  | 0.233711  |
| 8  | 7 | 0 | -3.047470 | 0.018620  | 0.023753  |
| 9  | 7 | 0 | -3.947036 | -0.672848 | -0.193576 |
| 10 | 7 | 0 | 1.167009  | -0.785554 | -0.131961 |
| 11 | 1 | 0 | 1.294817  | -1.724429 | 0.215189  |
| 12 | 6 | 0 | 2.218362  | 0.073802  | -0.108588 |
| 13 | 6 | 0 | 3.533904  | -0.504469 | 0.355350  |
| 14 | 1 | 0 | 3.466326  | -1.560229 | 0.621284  |
| 15 | 1 | 0 | 4.268317  | -0.380460 | -0.443241 |
| 16 | 1 | 0 | 3.877383  | 0.064366  | 1.221900  |
| 17 | 8 | 0 | 2.106170  | 1.252378  | -0.458265 |

-----  
*agg*, E = -450.5162202 a.u.  
 -----

| Center<br>Number | Atomic<br>Number | Atomic<br>Type | Coordinates (Angstroms) |           |           |
|------------------|------------------|----------------|-------------------------|-----------|-----------|
|                  |                  |                | X                       | Y         | Z         |
| 1                | 6                | 0              | 0.228328                | -1.447832 | -0.446824 |
| 2                | 1                | 0              | -0.084613               | -1.927831 | -1.376116 |
| 3                | 1                | 0              | 0.773084                | -2.176545 | 0.157194  |
| 4                | 6                | 0              | -0.987026               | -0.978976 | 0.334233  |
| 5                | 1                | 0              | -1.636022               | -1.830556 | 0.565849  |
| 6                | 1                | 0              | -0.671510               | -0.496984 | 1.264800  |
| 7                | 7                | 0              | -1.709766               | -0.005110 | -0.520166 |
| 8                | 7                | 0              | -2.698135               | 0.520014  | 0.001167  |
| 9                | 7                | 0              | -3.637210               | 1.079672  | 0.373817  |
| 10               | 7                | 0              | 1.121683                | -0.355612 | -0.776498 |
| 11               | 1                | 0              | 0.965891                | 0.149619  | -1.636048 |
| 12               | 6                | 0              | 1.962162                | 0.179347  | 0.145567  |
| 13               | 6                | 0              | 2.727497                | 1.404985  | -0.293483 |
| 14               | 1                | 0              | 2.606108                | 1.624423  | -1.355211 |
| 15               | 1                | 0              | 2.376266                | 2.259296  | 0.290478  |
| 16               | 1                | 0              | 3.785706                | 1.255771  | -0.071778 |
| 17               | 8                | 0              | 2.095415                | -0.309386 | 1.271956  |

-----  
*agg*<sup>-</sup>, E = -450.515454 a.u.  
 -----

| Center<br>Number | Atomic<br>Number | Atomic<br>Type | Coordinates (Angstroms) |           |           |
|------------------|------------------|----------------|-------------------------|-----------|-----------|
|                  |                  |                | X                       | Y         | Z         |
| 1                | 6                | 0              | 0.223329                | 1.558799  | 0.177825  |
| 2                | 1                | 0              | 0.353996                | 1.435911  | 1.253421  |
| 3                | 1                | 0              | 0.397720                | 2.607579  | -0.078947 |
| 4                | 6                | 0              | -1.195176               | 1.190714  | -0.219778 |
| 5                | 1                | 0              | -1.903546               | 1.842478  | 0.303457  |
| 6                | 1                | 0              | -1.333581               | 1.306414  | -1.300701 |
| 7                | 7                | 0              | -1.420276               | -0.223932 | 0.161372  |
| 8                | 7                | 0              | -2.573462               | -0.631530 | -0.005494 |
| 9                | 7                | 0              | -3.609325               | -1.129776 | -0.119860 |
| 10               | 7                | 0              | 1.205695                | 0.724572  | -0.481454 |
| 11               | 1                | 0              | 1.329992                | 0.826929  | -1.478499 |
| 12               | 6                | 0              | 1.898196                | -0.256767 | 0.152993  |

|    |   |   |          |           |           |
|----|---|---|----------|-----------|-----------|
| 13 | 6 | 0 | 2.811998 | -1.076625 | -0.728544 |
| 14 | 1 | 0 | 2.884116 | -0.691685 | -1.746735 |
| 15 | 1 | 0 | 3.805802 | -1.099065 | -0.277705 |
| 16 | 1 | 0 | 2.431768 | -2.100551 | -0.759969 |
| 17 | 8 | 0 | 1.798152 | -0.475009 | 1.363594  |

-----  
**ggg**, E = -450.5161536 a.u.  
 -----

| Center<br>Number | Atomic<br>Number | Atomic<br>Type | Coordinates (Angstroms) |           |           |
|------------------|------------------|----------------|-------------------------|-----------|-----------|
|                  |                  |                | X                       | Y         | Z         |
| 1                | 6                | 0              | -0.145934               | 0.728827  | 0.923931  |
| 2                | 1                | 0              | -0.834053               | 0.374250  | 1.695427  |
| 3                | 1                | 0              | 0.384520                | 1.601211  | 1.314724  |
| 4                | 6                | 0              | -0.912262               | 1.150120  | -0.325394 |
| 5                | 1                | 0              | -1.593929               | 1.974087  | -0.086864 |
| 6                | 1                | 0              | -0.219539               | 1.472753  | -1.100675 |
| 7                | 7                | 0              | -1.666292               | 0.019410  | -0.918882 |
| 8                | 7                | 0              | -2.607586               | -0.404018 | -0.238893 |
| 9                | 7                | 0              | -3.513071               | -0.890386 | 0.289366  |
| 10               | 7                | 0              | 0.812073                | -0.325300 | 0.657582  |
| 11               | 1                | 0              | 0.544948                | -1.284005 | 0.823161  |
| 12               | 6                | 0              | 1.987030                | -0.073626 | 0.027436  |
| 13               | 6                | 0              | 2.848909                | -1.277392 | -0.270122 |
| 14               | 1                | 0              | 2.449820                | -2.201251 | 0.150737  |
| 15               | 1                | 0              | 2.932190                | -1.384352 | -1.354243 |
| 16               | 1                | 0              | 3.848760                | -1.098731 | 0.129869  |
| 17               | 8                | 0              | 2.330620                | 1.072566  | -0.278933 |

-----  
**ggg<sup>-</sup>**, E = -450.5173091 a.u.  
 -----

| Center<br>Number | Atomic<br>Number | Atomic<br>Type | Coordinates (Angstroms) |           |           |
|------------------|------------------|----------------|-------------------------|-----------|-----------|
|                  |                  |                | X                       | Y         | Z         |
| 1                | 6                | 0              | 0.138400                | 1.371474  | -0.773791 |
| 2                | 1                | 0              | 0.382335                | 0.637296  | -1.544549 |
| 3                | 1                | 0              | 0.016708                | 2.346333  | -1.254043 |
| 4                | 6                | 0              | 1.269266                | 1.464734  | 0.246085  |
| 5                | 1                | 0              | 2.191395                | 1.788306  | -0.250164 |
| 6                | 1                | 0              | 1.019148                | 2.181706  | 1.028272  |
| 7                | 7                | 0              | 1.488805                | 0.181509  | 0.952259  |
| 8                | 7                | 0              | 1.938220                | -0.733166 | 0.253365  |
| 9                | 7                | 0              | 2.362470                | -1.666560 | -0.278282 |
| 10               | 7                | 0              | -1.116330               | 0.976913  | -0.169343 |
| 11               | 1                | 0              | -1.646741               | 1.670175  | 0.338050  |
| 12               | 6                | 0              | -1.545327               | -0.311680 | -0.146609 |
| 13               | 6                | 0              | -2.828476               | -0.558252 | 0.611793  |
| 14               | 1                | 0              | -3.325467               | 0.362046  | 0.921949  |
| 15               | 1                | 0              | -3.501970               | -1.140612 | -0.019406 |
| 16               | 1                | 0              | -2.595830               | -1.153637 | 1.498168  |
| 17               | 8                | 0              | -0.931863               | -1.225019 | -0.706143 |

-----  
**g<sup>-</sup>gg**, E = -450.5178264 a.u.  
 -----

| Center | Atomic | Atomic | Coordinates (Angstroms) |  |  |
|--------|--------|--------|-------------------------|--|--|
|--------|--------|--------|-------------------------|--|--|

| Number | Number | Type | X         | Y         | Z         |
|--------|--------|------|-----------|-----------|-----------|
| 1      | 6      | 0    | 0.296952  | -1.564350 | 0.589073  |
| 2      | 1      | 0    | 0.752330  | -1.832506 | 1.543695  |
| 3      | 1      | 0    | -0.251881 | -2.429095 | 0.204017  |
| 4      | 6      | 0    | 1.384635  | -1.189404 | -0.412793 |
| 5      | 1      | 0    | 2.085477  | -2.017019 | -0.525279 |
| 6      | 1      | 0    | 0.945084  | -0.956837 | -1.386729 |
| 7      | 7      | 0    | 2.188900  | -0.041784 | 0.068626  |
| 8      | 7      | 0    | 1.672529  | 1.071898  | -0.079481 |
| 9      | 7      | 0    | 1.331629  | 2.171574  | -0.184473 |
| 10     | 7      | 0    | -0.623750 | -0.469666 | 0.829227  |
| 11     | 1      | 0    | -0.571241 | 0.033592  | 1.702375  |
| 12     | 6      | 0    | -1.559789 | -0.103424 | -0.083954 |
| 13     | 6      | 0    | -2.393353 | 1.101388  | 0.279983  |
| 14     | 1      | 0    | -2.366107 | 1.327017  | 1.347112  |
| 15     | 1      | 0    | -2.008757 | 1.964266  | -0.271320 |
| 16     | 1      | 0    | -3.423642 | 0.927636  | -0.032615 |
| 17     | 8      | 0    | -1.689636 | -0.700809 | -1.156550 |

$g^-gg^-$ , E = -450.5178436 a.u.

| Center Number | Atomic Number | Atomic Type | Coordinates (Angstroms) |           |           |
|---------------|---------------|-------------|-------------------------|-----------|-----------|
|               |               |             | X                       | Y         | Z         |
| 1             | 6             | 0           | 0.639804                | -1.629832 | -0.049988 |
| 2             | 1             | 0           | 0.483335                | -1.763112 | 1.021153  |
| 3             | 1             | 0           | 0.734476                | -2.613370 | -0.519632 |
| 4             | 6             | 0           | 1.922960                | -0.841355 | -0.288564 |
| 5             | 1             | 0           | 2.776963                | -1.402212 | 0.092359  |
| 6             | 1             | 0           | 2.070164                | -0.656216 | -1.358530 |
| 7             | 7             | 0           | 1.930576                | 0.440016  | 0.450597  |
| 8             | 7             | 0           | 1.177282                | 1.324151  | 0.027723  |
| 9             | 7             | 0           | 0.558279                | 2.257731  | -0.260607 |
| 10            | 7             | 0           | -0.522713               | -0.948770 | -0.583130 |
| 11            | 1             | 0           | -0.678387               | -0.973275 | -1.580909 |
| 12            | 6             | 0           | -1.425647               | -0.289200 | 0.192073  |
| 13            | 6             | 0           | -2.531438               | 0.408221  | -0.562724 |
| 14            | 1             | 0           | -2.649427               | 0.037870  | -1.582310 |
| 15            | 1             | 0           | -3.467028               | 0.285307  | -0.015886 |
| 16            | 1             | 0           | -2.293496               | 1.475235  | -0.601008 |
| 17            | 8             | 0           | -1.326830               | -0.223641 | 1.419737  |
